# Supplementary material for: Protocol for a pragmatic cluster randomised controlled trial assessing the clinical effectiveness and cost-effectiveness of Electronic RIsk-assessment for CAncer for patients in general practice (ERICA)
Source: PubMed Central journal article supplement (PMC10030284; doi:10.1136/bmjopen-2022-065232), 2023-03-20
Supplement: bmjopen-2022-065232.draft_revisions.pdf [file bmjopen-2022-065232.draft_revisions.pdf]

# BMJ Open

BMJ Open is committed to open peer review. As part of this commitment we make the peer review history of every article we publish publicly available.

When an article is published we post the peer reviewers' comments and the authors' responses online. We also post the versions of the paper that were used during peer review. These are the versions that the peer review comments apply to.

The versions of the paper that follow are the versions that were submitted during the peer review process. They are not the versions of record or the final published versions. They should not be cited or distributed as the published version of this manuscript.

BMJ Open is an open access journal and the full, final, typeset and author-corrected version of record of the manuscript is available on our site with no access controls, subscription charges or pay-per-view fees (<http://bmjopen.bmj.com>).

If you have any questions on BMJ Open's open peer review process please email [info.bmjopen@bmj.com](mailto:info.bmjopen@bmj.com)

# BMJ Open

**Protocol for a pragmatic cluster randomised controlled trial  
assessing the clinical effectiveness and cost-effectiveness  
of electronic risk-assessment for cancer for patients in  
general practice (ERICA)**

|                               |                                                                                                                                                                                                                                                                                                                                                                                                                                                                                                                                                                                                                                                                                                                                                                                                                                                                                                                                                                                                                                         |
|-------------------------------|-----------------------------------------------------------------------------------------------------------------------------------------------------------------------------------------------------------------------------------------------------------------------------------------------------------------------------------------------------------------------------------------------------------------------------------------------------------------------------------------------------------------------------------------------------------------------------------------------------------------------------------------------------------------------------------------------------------------------------------------------------------------------------------------------------------------------------------------------------------------------------------------------------------------------------------------------------------------------------------------------------------------------------------------|
| Journal:                      | <i>BMJ Open</i>                                                                                                                                                                                                                                                                                                                                                                                                                                                                                                                                                                                                                                                                                                                                                                                                                                                                                                                                                                                                                         |
| Manuscript ID                 | bmjopen-2022-065232                                                                                                                                                                                                                                                                                                                                                                                                                                                                                                                                                                                                                                                                                                                                                                                                                                                                                                                                                                                                                     |
| Article Type:                 | Protocol                                                                                                                                                                                                                                                                                                                                                                                                                                                                                                                                                                                                                                                                                                                                                                                                                                                                                                                                                                                                                                |
| Date Submitted by the Author: | 06-Jun-2022                                                                                                                                                                                                                                                                                                                                                                                                                                                                                                                                                                                                                                                                                                                                                                                                                                                                                                                                                                                                                             |
| Complete List of Authors:     | Hamilton, Willie; University of Exeter, Primary Care Diagnostics<br>Mounce, Luke; University of Exeter, Institute of Health Research<br>Abel, Gary; University of Exeter, University of Exeter Medical School (Primary Care)<br>Dean, Sarah; PenCLAHRC University of Exeter Medical School,<br>Campbell, John; University of Exeter, Primary Care<br>Warren, Fiona; University of Exeter Medical School, Institute of Health Research<br>Spencer, Anne; University of Exeter Medical School, Health Economics<br>Medina-Lara, Antonieta; University of Exeter Medical School, Health Economics Group<br>Pitt, Martin; University of Exeter, University of Exeter: Medical School<br>Shephard, Elizabeth; University of Exeter,<br>Shakespeare, Marijke; University of Exeter Medical School, Primary Care<br>Fletcher, Emily; University of Exeter Medical School, Primary Care Research Group<br>Mercer, Adrian; University of Exeter Medical School, Primary Care<br>Calitri, Raff; University of Exeter Medical School, Primary Care |
| Keywords:                     | HEALTH SERVICES ADMINISTRATION & MANAGEMENT, Risk management < HEALTH SERVICES ADMINISTRATION & MANAGEMENT, PRIMARY CARE, Clinical trials < THERAPEUTICS                                                                                                                                                                                                                                                                                                                                                                                                                                                                                                                                                                                                                                                                                                                                                                                                                                                                                |
|                               |                                                                                                                                                                                                                                                                                                                                                                                                                                                                                                                                                                                                                                                                                                                                                                                                                                                                                                                                                                                                                                         |

SCHOLARONE™  
Manuscripts

1  
2  
3  
4  
5  
6  
7  
8  
9  
10  
11  
12  
13  
14  
15  
16  
17  
18  
19  
20  
21  
22  
23  
24  
25  
26  
27  
28  
29  
30  
31  
32  
33  
34  
35  
36  
37  
38  
39  
40  
41  
42  
43  
44  
45  
46  
47  
48  
49  
50  
51  
52  
53  
54  
55  
56  
57  
58  
59  
60

## Protocol for a pragmatic cluster randomised controlled trial assessing the clinical effectiveness and cost-effectiveness of electronic risk-assessment for cancer for patients in general practice (ERICA)

Willie Hamilton,<sup>1</sup> Luke Mounce,<sup>1</sup> Gary Abel,<sup>1</sup> Sarah Dean,<sup>1</sup> John Campbell,<sup>1</sup> Fiona Warren,<sup>1</sup> Anne Spencer,<sup>1</sup> Antonieta Medina-Lara,<sup>1</sup> Martin Pitt,<sup>1</sup> Elizabeth Shephard,<sup>1</sup> Marijke Shakespeare,<sup>1</sup> Emily Fletcher,<sup>1</sup> Adrian Mercer,<sup>1</sup> Raff Calitri.<sup>1</sup>

<sup>1</sup>University of Exeter, St Luke's campus, Exeter, EX1 2LU

Willie Hamilton, Professor of Primary Care Diagnostics: [w.hamilton@exeter.ac.uk](mailto:w.hamilton@exeter.ac.uk), ORCID ID 0000-0003-1611-1373 (Corresponding author)

Luke Mounce, Research Fellow: [l.t.a.mounce@exeter.ac.uk](mailto:l.t.a.mounce@exeter.ac.uk), ORCID ID 0000-0002-6089-0661

Gary Abel, Associate Professor: [g.a.abel@exeter.ac.uk](mailto:g.a.abel@exeter.ac.uk), ORCID ID 0000-0003-2231-5161

Sarah G Dean, Professor in Psychology Applied to Rehabilitation and Health: [s.dean@exeter.ac.uk](mailto:s.dean@exeter.ac.uk), ORCID ID 0000-0002-3682-5149

John Campbell, Professor of General Practice and Primary Care: [john.compbell@exeter.ac.uk](mailto:john.compbell@exeter.ac.uk), ORCID ID 0000-0002-6752-3493

Fiona Warren, Senior Lecturer in Medical Statistics: [f.c.warren@exeter.ac.uk](mailto:f.c.warren@exeter.ac.uk), ORCID ID 0000-0002-3833-0182

Anne Spencer, Associate Professor: [a.e.spencer@exeter.ac.uk](mailto:a.e.spencer@exeter.ac.uk), ORCID ID 0000-0002-8163-3103

Antonieta Medina-Lara, Associate Professor in Health Economics: [a.medina-lara@exeter.ac.uk](mailto:a.medina-lara@exeter.ac.uk), ORCID ID 0000-0001-7325-8246

Martin Pitt, Professor of Applied Healthcare Modelling and Data Science: [m.pitt@exeter.ac.uk](mailto:m.pitt@exeter.ac.uk)

Elizabeth Shephard, Research Fellow: [e.a.shephard@exeter.ac.uk](mailto:e.a.shephard@exeter.ac.uk), ORCID ID 0000-0002-3610-3680

Marijke Shakespeare, Trial coordinator: [m.shakespeare@exeter.ac.uk](mailto:m.shakespeare@exeter.ac.uk)

Emily Fletcher, Research Fellow: [e.fletcher@exeter.ac.uk](mailto:e.fletcher@exeter.ac.uk), ORCID ID 0000-0003-1319-3051

Adrian Mercer, PPIE Representative, [zante256@gmail.com](mailto:zante256@gmail.com)

Raff Calitri, Research Fellow and Trial Manager, [r.calitri@exeter.ac.uk](mailto:r.calitri@exeter.ac.uk), ORCID ID 0000-0003-0889-4670

## Abstract

**Introduction.** The UK has worse cancer outcomes than most comparable countries, with a large contribution attributed to diagnostic delay. Electronic risk assessment tools (eRATs) have been developed to identify primary care patients with a  $\geq 2\%$  risk of cancer using features recorded in the electronic record.

**Methods and analysis.** This is a pragmatic cluster randomised controlled trial in English primary care. Individual general practices will be randomised in a 1:1 ratio to intervention (provision of eRATs for six common cancer sites) or to usual care. The primary outcome is cancer stage at diagnosis, dichotomised to stage 1 or 2 (early) or stage 3 or 4 (advanced) for these six cancers, assessed from national cancer registry data. Secondary outcomes include stage at diagnosis for a further six cancers without eRATs, use of urgent referral cancer pathways, total practice cancer diagnoses, routes to cancer diagnosis, and 30-day and 1-year cancer survival. Economic and process evaluations will be performed along with service delivery modelling. The primary analysis explores the proportion of cancer patients with early stage at diagnosis. The sample size calculation used an odds ratio of 0.8 for a cancer being diagnosed at advanced stage in the intervention arm compared with the control arm, equating to an absolute reduction of 4.8% as an incidence-weighted figure across the six cancers. This requires 530 practices overall, with the intervention active from April 2022 for 2 years.

**Ethics and dissemination.** The trial has approval from London City & East Research Ethics committee, reference number 19/LO/0615; protocol version 5.0, 9<sup>th</sup> May 2022. It is sponsored by the University of Exeter. Dissemination will be by journal publication, conferences, use of appropriate social media and direct sharing with cancer policymakers.

**Registration.** The trial is registered with ISRCTN: (trial no: ISRCTN22560297).

*Word Count: 5665*

Key words: Early cancer diagnosis, randomised controlled trial, clinical risk-assessment tools, General Practice

---

## Article summary

### Strengths and limitations of this study

- Improvements in primary care are seen as a key for improving early cancer diagnosis in the UK, and this trial is targeting that part of the diagnostic pathway.
  - This is a large, definitive trial, powered to identify a clinically important difference in cancer stage at diagnosis.
  - The trial is designed to minimise impact on participating practices with outcome data being obtained from routinely collected National Health Service data.
  - One limitation is that the UK's national imperative to improve cancer diagnosis after the COVID pandemic may mean use of other interventions (or eRATs themselves) are encouraged by policymakers, reducing the validity and reliability of the trial.
- 

### Introduction

An estimated 10,000 UK cancer deaths each year would not occur if the UK matched the outcomes of other European countries.(1) Much of the difference is attributed to diagnostic delay.(2) The NHS Long Term plan, published in January 2019, specifically targets an increase in the percentage of cancer patients whose cancer is stage 1 or 2 (thus potentially curable) at diagnosis to rise from the current 54% to 75% by 2028.(3) Diagnosis of cancer may occur by several routes, but the main ones are population screening, and diagnosis after symptoms have occurred. Although screening for cancer is effective for colorectal, breast, lung and cervical cancers,(4-6) less than 10% of the total new UK cancers are identified by this route. Most of the remainder are diagnosed after presenting with symptoms, usually to primary care. Of patients with cancer, just under 20% present with an emergency complication of their cancer; however, many of these patients have previously reported symptoms attributable to their cancer to primary care, but this presentation did not lead to a diagnosis of cancer.(7) Within general practice, many studies have aimed at identifying the symptoms of possible cancer and quantifying their predictive value.(8) One main output has been Risk Assessment Tools (generally abbreviated to RATs); these give precise estimates of the chance of an underlying cancer as a percentage figure. RATs provide precise estimates for single symptoms (e.g. the risk of cancer of the lung for a person aged 40 years or more with haemoptysis is 2.4%), as pairs of symptoms (haemoptysis accompanied by loss of weight is 9.2%) or as repeated symptoms (a re-attendance with haemoptysis is 17%).(9) RATs are published for the 18 most common adult cancers, accounting for nearly 90% of the total cancer burden. These publications have been highly influential: in particular, they strongly contributed to the National Institute of Healthcare Excellence (NICE) guideline, Suspected cancer: recognition and referral [NG12], which guides symptomatic diagnosis of cancer in the UK.(10)

1 The initial RATs, of paper, mouse mat, calendar, or web-based forms, increased cancer diagnostic  
2 activity,(11) though impacts on hard outcomes such as stage at diagnosis or cancer survival were  
3 unknown. Electronic RATs (eRATs) for seven major cancers (lung, colorectal, pancreas, oesophago-  
4 gastric, bladder, kidney and ovary) have been developed for the two largest UK primary care electronic  
5 healthcare record systems, SystmOne and EMIS, used in around 80% of English practices. The software  
6 performs daily calculations of individual cancer risk in patients aged 40 and over, using coded  
7 symptoms and laboratory results in the patient's record over the past year, and prompts the general  
8 practitioner (GP) when the risk of one or more of these cancers is equal to or above 2%. Some form of  
9 electronic clinical decision support for cancer diagnosis has been downloaded by practices and used  
10 by at least one practice member in approximately 12% of English practices.(12). Two systematic  
11 reviews recently concluded that more research evidence was needed for impact on time to diagnosis  
12 and treatment, stage at diagnosis, and health outcomes, as well as research to understand how tools  
13 are used in GP consultations.(13) A feasibility trial of the oesophago-gastric eRAT published after these  
14 systematic reviews reported installation and regulatory problems that severely restricted usage,(14)  
15 and a vignette study of the colorectal RAT suggested it changed the GP's inclination to refer in 26% of  
16 usages.(15)

17  
18  
19  
20  
21  
22  
23  
24  
25  
26  
27  
28  
29 One crucial aspect of eRAT research relates to cost-effectiveness: annual NHS spending on cancer  
30 diagnosis is approximately £1bn.(16) Observational data showed increased use of the urgent cancer  
31 referral system to improve survival,(17) but there is insufficient data to inform a cost-effectiveness  
32 analysis of the subject.(13)

### 33 34 35 36 37 38 **Objectives**

39  
40 The overarching aim of the trial is to assess the clinical and cost-effectiveness of using eRATs for six  
41 cancer sites – colorectal, lung, bladder, kidney, oesophago-gastric and ovarian cancers - compared  
42 with usual care for patients in general practice.  
43  
44

45  
46  
47 The primary objective is to compare the effects of using eRATs (vs usual care) on the percentage of  
48 patients with a newly diagnosed cancer at one of the six sites whose cancer is staged as being stage 1  
49 or 2 (versus stage 3 or 4).  
50  
51

52  
53 A secondary objective is to investigate differences in the stage at diagnosis of a further six cancers  
54 without eRATs (combined): breast, melanoma, prostate, Non-Hodgkin lymphoma, larynx and uterus.  
55 This is to investigate the possibility of an effect whereby eRATs are associated with increased  
56 diagnostic activity beyond the eRAT cancers. We will also investigate differences in: the number of  
57  
58  
59  
60

1 patients diagnosed with the six eRAT cancers combined, and the total number of cancers (excluding  
2 non-melanoma skin cancer) diagnosed, use of the 2-week wait referral system (the main pathway for  
3 urgent investigation of possible cancer in England) or equivalent for the six eRAT cancers combined,  
4 and across all cancers; the routes to diagnosis for each of the six eRAT cancers,(18) and for the six  
5 comparator non-eRAT cancers; the proportion of patients on a 2-week wait pathway receiving a  
6 diagnosis of cancer; whether a patient on a 2-week wait pathway has a diagnosis of cancer established  
7 (or refuted) within 28 days; 30-day and 1-year survival for those with cancer; the rate of cancer  
8 investigations, namely colonoscopies, sigmoidoscopies, upper gastro-intestinal endoscopies, chest x-  
9 rays, abdominal ultrasounds, and abdominal CT scans. We will also conduct parallel cost-effectiveness  
10 analyses, service delivery modelling and a process evaluation.  
11  
12  
13  
14  
15  
16  
17  
18

## 19 **Methods and analysis**

### 20 ***Design and setting***

21  
22 The study is a pragmatic cluster randomised-controlled trial in England, in primary care medical  
23 practices using one of the two (SystemOne or EMIS) electronic record keeping systems. The clusters  
24 are practices, a term which includes single practices, and small groups of practices agglomerated  
25 administratively to single entities. These will be randomised 1:1 to receive either the intervention  
26 (access to the suite of eRATs) or usual care. It is unrealistic to offer eRATs to individual GPs, as there  
27 would be considerable contamination within any practice. Nevertheless, for a practice to be eligible  
28 to take part, we ask at least 50% of GPs in that practice to agree to use the eRATs. Although the  
29 intervention is at the practice level, some process and resource use measures and all main trial primary  
30 and secondary outcomes relate to individual patients.  
31  
32  
33  
34  
35  
36  
37  
38  
39

### 40 ***Intervention***

#### 41 **The eRATs**

42 The eRATs have been developed by a specialist IT team, Informatica systems Ltd, in partnership with  
43 the cancer charity, Macmillan. The risk estimates in the eRATs are from the original research papers  
44 for each cancer site. (9, 19-24) Practices will access the software via a new cloud-based system called  
45 Skyline, specifically designed to facilitate efficient integration into GP clinical systems. CA marking of  
46 the Skyline version of eRATs was obtained in September 2021.  
47  
48  
49  
50  
51  
52

53 The eRATs have multiple functions. The first is the '*prompt*'. This collates relevant coded symptoms  
54 and blood tests in the patient's medical record from the previous 12 months, which are then assessed  
55 for the possibility of cancer, generating a risk score equivalent to the positive predictive value of the  
56 cancer features for each cancer. A prompt (pop-up), displaying the risk score(s), appears on screen  
57 when a registered user opens a patient's medical records and indicates that patient has a risk of 2%  
58  
59  
60

1  
2  
3  
4  
5  
6  
7  
8  
9  
10  
11  
12  
13  
14  
15  
16  
17  
18  
19  
20  
21  
22  
23  
24  
25  
26  
27  
28  
29  
30  
31  
32  
33  
34  
35  
36  
37  
38  
39  
40  
41  
42  
43  
44  
45  
46  
47  
48  
49  
50  
51  
52  
53  
54  
55  
56  
57  
58  
59  
60

or higher for at least one of the studied cancers. A second function is the *'symptom checker'*, allowing the clinician to add the patient's symptoms to the eRAT checklist, which automatically recalculates the risk of any of the six cancers. On reviewing the risk score from the prompt and/or symptom checker, the clinician then decides the best course of management, which may be: (i) clinical review in primary care; (ii) ordering of test/investigations; or (iii) referral into secondary care. Embedded within all eRATS are links to authoritative guidance regarding the early diagnosis of cancer, NICE NG12,(25), Macmillan's abbreviated NICE guidance,(26) and Cancer Research UK guidance. (27) These sources of information are added to assist management of the patient, but the decision whether – or not – to investigate is for the clinician and patient. Some EMIS practices also have access to the Qcancer risk tool, (28) albeit embedded in a dormant state within the practice IT and record system, and requiring manual activation prior to operation. All practices will be asked not to use it during the trial.

### Justification of cancer sites

RATs are available for 18 adult cancers, each varying in their incidence, ease of diagnosis, amenability to treatment and proportion presenting as an emergency. We elected to study cancer sites a) which were in the top 15 cancers by incidence; b) for which curative treatment is reasonably possible in symptomatic patients;(29) and c) with a significant percentage of patients presenting as an emergency.(30). Using these criteria, six cancer sites were selected, amounting to approximately half of all incident cancers. The remaining nine cancers were considered as comparators to examine for any practice level effect of increased cancer diagnostic activity. Three cancers, brain, pancreas and leukaemia, were removed for clinical and practical reasons: no eRAT is available for brain or leukaemia; in both brain and pancreas, symptomatic diagnosis is considered to have a very small likelihood of improving survival,(29) and in leukaemia, a full blood count (easily available in primary care) will usually establish the diagnosis, making an eRAT unlikely to expedite the diagnosis.(31)

### Training practices in using eRATs

Training in the use of the eRATs uses short, pre-recorded videos available online co-ordinated by a practice 'research champion'. These show GPs how to use the prompt and symptom checker functions.

### Duration of intervention

Practice recruitment started in August 2019 and is expected to finish at the end of March 2022, including the installation of the eRATs software. The trial was paused for 6 months in March 2020 due



1 to Covid-19. The formal start of the intervention window will be 01/04/2022 (although some practices  
2 may have delayed installation) and will close for all intervention practices on 31/3/2024.  
3  
4  
5

### 6 **Usual care**

7  
8 Patients presenting to the control practices will experience the GP's usual diagnostic approach. GPs in  
9 control practices will have no specific on-screen prompt, though they may have access to hard-copy  
10 (e.g. paper or mouse mat) versions of the RATs, or to other cancer tools such as those supporting  
11 structured follow-up of symptomatic patients not selected for initial investigation. For EMIS practices  
12 with Qcancer dormant in the system, control practices are expected to leave it dormant. We will  
13 document control practice use of RATs, other decision support tools, and access to and use of eRATs  
14 via interim and exit questionnaires completed within the first 12 months of a practice commencing  
15 the intervention and at the end of the trial. In line with intervention practices, trial time will formally  
16 begin for control practices on 01/04/2022 and end on 31/03/2024.  
17  
18  
19  
20  
21  
22  
23

### 24 **Data collection window**

25  
26 Outcome data for all practices will be obtained for the 2-year period from 01/06/2022 to 29/05/2024.  
27 This data collection window is lagged behind the trial time window (01/04/2022 to 31/03/2024) in  
28 order to: a) provide some time for practices to become accustomed to how the intervention functions  
29 prior to data collection, and b) to have a 2-month window following the end of the intervention  
30 window in order to allow cancers to be diagnosed in patients seen towards the end of that window.  
31  
32  
33  
34

### 35 **Sample size**

36  
37 There are around 130,000 new diagnoses of the six included cancers in the UK annually.<sup>(32)</sup> As each  
38 of our six cancer sites has different proportions diagnosed at an early stage, the sample size calculation  
39 is based on a relative improvement in staging, using an odds ratio of 0.8 for a cancer being diagnosed  
40 at Stage 3/4 in the intervention arm compared with the control arm. This difference is quite large and  
41 equates to an absolute reduction of 4.8% in the intervention arm as an incidence-weighted figure  
42 across the six cancers. A much smaller improvement would still be clinically valuable but would  
43 necessitate an impossibly large trial.  
44  
45  
46  
47  
48  
49  
50

51 For the inflation factor we have used an intra-cluster correlation coefficient based on our previous  
52 work, of 0.05.<sup>(33)</sup> An average cluster size of 23 patients with a diagnosed cancer with recorded stage  
53 during 2-year follow-up is expected, with a coefficient of variation for cluster size of 0.7, giving a design  
54 effect of 2.66. For an individually randomised trial with 90% power and an alpha threshold of 0.05, the  
55 sample size would be 2,049 patients per arm. Adding in the design effect, this becomes 5,497 patients,  
56 requiring 239 practices per arm, and 478 practices in total. Due to changes in practice structure (such  
57  
58  
59  
60

1  
2  
3  
4  
5  
6  
7  
8  
9  
10  
11  
12  
13  
14  
15  
16  
17  
18  
19  
20  
21  
22  
23  
24  
25  
26  
27  
28  
29  
30  
31  
32  
33  
34  
35  
36  
37  
38  
39  
40  
41  
42  
43  
44  
45  
46  
47  
48  
49  
50  
51  
52  
53  
54  
55  
56  
57  
58  
59  
60

as practice mergers, closures or divisions), we anticipate the loss of up to 10% of recruited practices over the course of the trial; to account for this we will recruit a target of 530 practices overall, expecting 12,190 patients to be diagnosed with cancer in total.

### **Practice recruitment**

A total of 530 primary care practices across England will be recruited, supported by the NIHR Clinical Research Network (CRN) and strategic media releases to raise awareness of the trial. Practices that are proposing a split or a merger are not eligible for the trial, as the practices before or after the change may have been allocated to different arms in the trial. A method for identifying and managing unanticipated splits or mergers during the active phase of the trial is shown in Appendix A.

Patients are not being recruited into this trial - patient consent is not being sought for the use of the eRATs during the consultation. This is because ERATs are essentially an extension and enhancement of existing diagnostic tools already available to the GP to support their clinical decision making. Other randomised controlled trials of interventions in primary care have taken this approach,(34) including the feasibility trial of the oesophago-gastric eRAT.(14, 35, 36) To promote patient awareness of the practice's participation in the ERICA trial, including requesting practices to add it to their websites and any social media feed. A selection of patients will be recruited to the nested process evaluation and health economics studies (see below and Appendices B and D).

### **Randomisation**

Practices will be randomised using a 1:1 ratio into one of two trial arms: usual diagnostic care (control) and usual diagnostic practice plus access to the suite of eRATs, as the intervention. Randomisation will be computer-generated and web-based, conducted by an independent member of staff at the Exeter Clinical Trials Unit (ExeCTU), overseen by the CTU statistician (not the trial statistician). To promote balance between the trial arms in practices' use of the 2-week wait system, and therefore propensity to refer to secondary care, we will minimise randomisation by age-sex standardised 2-week wait referral ratio (the best available proxy) in national tertiles. We will use simple randomisation to allocate the first 50 practices (~10% of the total target), and then apply minimisation by 2-week wait referral ratio tertile, taking into account the previous allocations to inform the minimisation algorithm. To promote allocation concealment, all allocations using the minimisation algorithm will retain a stochastic element.

The data analysis will be carried out by the trial statistician and health-economist, blinded to treatment allocation and all primary outcome data are objective assessments of clinical outcome. Staging (the primary outcome) will be performed by pathologists unaware of trial participation or

1 allocation. However, given the nature of the intervention, it is not possible to blind GPs or the GP  
2 practice to treatment allocation.  
3  
4  
5

## 6 Outcome measures 7

### 8 Primary outcome 9

10 Outcome measures will be captured at patient-level, using data routinely collected by the National  
11 Cancer Registration and Analysis Service (NCRAS). The primary outcome is whether a patient is  
12 diagnosed at stage 1 or 2 (early) or stage 3 or 4 (advanced). This division of staging is commonly used  
13 and is a targeted metric in the 2019 NHS Long Term Plan - for stage 1 and 2 cancers (for all staged  
14 cancers other than non-melanoma skin cancer) at diagnosis to comprise 75% of the total by 2028. The  
15 current UK overall incidence-weighted percentage of early stage at diagnosis was 55% in 2018, though  
16 for the six eRAT cancers, it is 35%.<sup>(37)</sup>  
17  
18  
19  
20  
21  
22  
23  
24

### 25 Secondary outcomes

26 A range of secondary outcomes will be examined:  
27

- 28 1. 1. The binary stage at diagnosis of a further six cancers without eRATs will be identified from  
29 NCRAS, and compared between intervention and control practices. This is to investigate the  
30 possibility of a 'spill-over' effect whereby eRATs are associated with increased diagnostic  
31 activity beyond the eRAT cancers.  
32
- 33 2. The practice's number of patients diagnosed with the six eRAT cancers combined, and the  
34 total number of cancer cases, from NCRAS.  
35
- 36 3. The number of patients investigated or referred under the 2-week wait system for the six eRAT  
37 cancers combined, and in total, from Cancer Waiting Times data.  
38
- 39 4. Route to diagnosis from the Routes to Diagnosis Dataset,<sup>(18)</sup> which uses Hospital Episode  
40 Statistics data. This will be categorised into four possible routes: emergency attendance, 2-  
41 week wait referral, GP referral, and "other". We will collect this information for each of the  
42 six eRAT cancers, and for the six comparator non-eRAT cancers.  
43
- 44 5. 2-week wait performance measures, from Cancer Waiting Times data, for the six eRAT cancers  
45 combined, and for all cancer referrals:  
46  
47 5.1 Whether a patient on a 2-week wait pathway received a diagnosis of cancer, expressed as-  
48 the proportion of patients who received a cancer diagnosis, also known as the conversion rate.  
49  
50 5.2 The duration between 2-week wait referral and diagnosis of cancer, in particular diagnosis  
51 within 28 days, the Faster Diagnosis Standard (introduced in 2022).  
52  
53  
54  
55  
56  
57  
58  
59  
60

1  
2  
3  
4  
5  
6  
7  
8  
9  
10  
11  
12  
13  
14  
15  
16  
17  
18  
19  
20  
21  
22  
23  
24  
25  
26  
27  
28  
29  
30  
31  
32  
33  
34  
35  
36  
37  
38  
39  
40  
41  
42  
43  
44  
45  
46  
47  
48  
49  
50  
51  
52  
53  
54  
55  
56  
57  
58  
59  
60

5.3 Detection rate – the proportion of a practice’s cancers which are identified via the 2-week wait pathway.

6. Survival measures: 30-day; 1-year (identified from NCRAS). 5-year survival will also be reported, but the main trial will report on 30 day and 1-year, with 5-year data being a subsidiary report.

7. Adverse events (using data from the Diagnostic Imaging Dataset): these are expected to be few, and largely related to complications from hospital investigation such as colonoscopy. There is no mechanism for adverse events to be collected using routine data. We will, however, estimate any change in the expected number of adverse events from imaging investigations (colonoscopies, sigmoidoscopies, upper gastro-intestinal endoscopies, chest x-rays, abdominal ultrasounds, and abdominal CT scans) through investigating any change in the rate of these investigations in intervention practices relative to control practices (see data analysis section). Potential adverse psychological consequences of being labelled with ‘possible cancer’ will be further explored in the process evaluation.

## Data collection

All primary and secondary outcome measures are available from NCRAS, DID and publicly available practice level data, including Cancer Waiting Times data. We will be using depersonalised (pseudo-anonymised) data. The Public Health England Office for Data Release (ODR) guidelines indicated that no legal gateway (e.g., section 251 approval) will be necessary to obtain these data.

## Data analysis

All analyses will follow CONSORT guidelines for cluster-randomised and pragmatic trials. The primary analysis, exploring the proportion of cancer patients with early stage at diagnosis, will use mixed-effects logistic regression with a random intercept for practice to accommodate the hierarchical nature of the data (i.e. random allocation by practice, with participants nested within practice). This regression will include trial-arm at practice-level, and will adjust for patient-level covariates known to be associated with stage (age, sex, quintile of the income domain from the Index of Multiple Deprivation (IMD), and cancer site),(38) and the practice-level minimisation variable (national tertile of age-sex standardised two-week wait referral ratio). We will further adjust the model at the practice-level for list size, clinical IT system used, and Care Quality Commission (CQC) overall rating, should these variables be associated with stage in preliminary analyses (even if not unbalanced with respect to trial allocation). Trial arm and covariates will all be entered as fixed effects. The degree of change

1 in the percentage of patients diagnosed at a late stage in intervention practices will be investigated  
2 by exploring the marginal distributions of trial arm on the probabilities predicted by these models.  
3  
4

5 For the secondary outcome of the stage at diagnosis of six cancers without eRATs, we will repeat the  
6 above model including data on the six non-eRAT cancers as well as the six eRAT cancers. This model  
7 will use all the variables described above, plus an indicator variable for whether the cancer site has an  
8 eRAT and an interaction term between this variable and trial arm. From this model, we will obtain  
9 odds ratios (with 95% CIs) for: (i) the “spill over” effect of having the intervention on cancer sites not  
10 included in the intervention, and (ii) for the relative effect of the intervention on stage for included  
11 cancer sites compared with those not included in the intervention.  
12  
13  
14  
15  
16

17  
18  
19 Mixed-effects logistic regression models with a random intercept for practice will also be fitted for the  
20 other secondary binary outcomes; route to diagnosis, conversion rate, and timeliness. These models  
21 will include trial arm as a practice-level effect, and will adjust at the patient-level for age, sex, and  
22 quintile of the Index of Multiple Deprivation (IMD) income domain, and at the practice-level for the  
23 minimisation variable (national tertile of age-sex standardised two-week wait referral ratio). These  
24 analyses will also adjust at the patient-level for cancer site (routes to diagnosis analyses) or for referral  
25 type (2-week wait analyses) as appropriate. The models will be further adjusted as in the main  
26 outcome variable analysis.  
27  
28  
29  
30  
31  
32

33  
34 Time-to-event secondary outcomes (length of waiting time, survival) will be analysed using mixed-  
35 effects parametric survival models with a random intercept for practice, and all other variables added  
36 as fixed effects. These models will include trial-arm as a practice-level effect, and will adjust for the  
37 same patient-level factors as described above (waiting times adjusted for referral pathway rather than  
38 cancer site as above), and the practice-level minimisation variable (national tertile of age-sex  
39 standardised 2-week wait referral ratio). The models will also use the same adjustment as the primary  
40 outcome measure. An appropriate distribution to model the baseline hazard will be utilised, as  
41 determined by a comparison of the Akaike Information Criteria under different distributions.(39)  
42  
43  
44  
45  
46  
47  
48

49 For rate outcomes (number of 2-week wait referrals, cancers, and imaging investigations), we will  
50 analyse the rates per 100,000 registered patients per year by age-sex strata using mixed-effects  
51 Poisson regression models including a random intercept for practice. These models will include trial-  
52 arm as a predictor and will adjust for the age and sex of the strata, and at the practice-level for the  
53 minimisation variable (2-week wait referral ratio) and deprivation (quintile of IMD overall score). The  
54 models will be further adjusted at the practice-level for list size, clinical IT system used, CQC overall  
55 rating, and for the age and sex case-mix of practices should these covariates be found to be associated  
56  
57  
58  
59  
60

1 with the outcome (even if not unbalanced with respect to allocation). Case-mix will be incorporated  
2 by including variables for counts of practice populations in different age-sex strata (5-year age groups  
3 by sex, excluding one age group-sex stratum that can be determined once all others are known).  
4  
5

6  
7 All the above analyses will combine data for the six eRAT cancers for each model. For outcomes  
8 related to two-week wait referrals, data will be combined for all referral pathways relevant to the six  
9 eRAT cancers. To investigate whether the eRATs produce a “spill-over” effect, whereby diagnostic  
10 activity is increased for other cancers, we will repeat all analyses using data for the six non-eRAT  
11 cancers combined for each model. Investigation of a spill-over effect for 2-week wait referral  
12 outcomes will use data for all referral pathways combined.  
13  
14  
15  
16

17  
18 Additional sensitivity analyses will be conducted for the primary outcome in order to explore  
19 moderation arising from practice-level characteristics, using interaction terms. Although the trial has  
20 not been powered to detect low to moderate subgroup differences, large interaction effects that differ  
21 with respect to the direction of effect across subgroups are of interest. The potential impact of missing  
22 staging data on the primary outcome will also be explored through use of multiple imputation  
23 methods making use of auxiliary variables such as survival time, morphology and grade to improve the  
24 Missing At Random (MAR) assumption in line with previous work).(40)  
25  
26  
27  
28  
29  
30

### 31 **Data management**

32  
33 Cancer registry data (NCRAS) will be managed and prepared by the registry themselves and  
34 securely, electronically transferred to the study team. There will be no patient identifiable data within  
35 these datasets. Data from NCRAS will be stored on the Secure Data Resource Hub at the University of  
36 Exeter (which meets requirements for secure storage of sensitive data) and linked to existing practice  
37 data held within ExeCTU’s REDCap database. The data will be stored and retained in accordance with  
38 registry policies.  
39  
40  
41  
42  
43  
44

45 The nested studies rely on identifying patients from in-practice usage reports. These reports contain  
46 depersonalised (pseudo-anonymised) data. The practice will send a copy to the trial team with the  
47 original practice ID number removed. The local at practice reports will be securely and electronically  
48 transferred to a secure Exeter CTU computer.  
49  
50  
51

52  
53 In the recruitment of patients (and NHS staff) for interviews, questionnaires, or permission for access  
54 to medical notes, participant details will be passed securely between NHS services and the research  
55 team. All participants agreeing to interview, to complete a questionnaire, and/or medical notes  
56 review, and all GPs agreeing to interview will be allocated a unique study ID, and the information  
57 linking their ID to their personal details will be kept securely at the University of Exeter. All other  
58  
59  
60

1 participant-related paper records will be anonymised and stored separately from the personal  
2 information. The electronic database for the trial will be stored on the secure servers of the University  
3 of Exeter with password-controlled access provided for the research team by ExeCTU. Single data  
4 entry with extensive in-built validity checks will be used to reduce the risk of transcription errors.  
5  
6  
7

8 Audio recordings will be digitised, encrypted and stored on the University's secure server. Audio  
9 recordings will be retained until after anonymised transcripts have been finalised and analysed. At this  
10 stage they will be securely and permanently deleted. Access to personal data will be restricted to the  
11 research team. Names and participant details will not be passed to any third parties and no named  
12 individuals will be included in the outputs. All participants (patients, NHS staff) will be asked for their  
13 consent for the study team to retain interview transcripts for the purposes of future research by those  
14 involved directly in the study team or to be used for educational purposes.  
15  
16  
17  
18  
19

20 Informatica Systems Ltd has developed a separate agreement ('Data processing deed') for  
21 intervention practices which will be used between the GP practices and Informatica Systems Ltd. The  
22 deed was necessary because the development of Skyline has impacted on the processing  
23 arrangements for the eRATs software that is used. The ERICA research study will still use  
24 the Organisation Information Document which outlines the research team's data processing  
25 requirements, to be signed between the practice and Sponsor.  
26  
27  
28  
29  
30  
31  
32  
33

34 All study data will be kept for 10 years (unless data registry policy requires otherwise) under secure  
35 conditions on University of Exeter secure servers. Data will also be subject to standard secure storage  
36 and usage policies.  
37  
38  
39  
40  
41

## 42 **Trial monitoring and management**

### 43 *Trial Sponsor and Funders*

44 The University of Exeter is the trial sponsor. The trial funders are providing finance to run the  
45 trial. None of the funders or sponsor will be involved in the design or day-to-day conduct of the trial,  
46 analysis of data, or interpretation of findings.  
47  
48  
49  
50  
51  
52  
53

### 54 *Trial Steering Committee (with Data Monitoring Committee responsibilities)*

55 The responsibilities of the Trial Steering Committee (TSC) will be to review the main study protocol  
56 and any amendments, monitor and supervise the trial towards its interim and overall objectives,  
57 review relevant information from other sources, and to help resolve problems brought by the Trial  
58  
59  
60

1 Management group (TMG). The TSC will therefore provide overall independent supervision for ERICA  
2 on behalf of the funders and the Sponsor. Meetings will be held at regular intervals determined by  
3 need and not less than twice a year. Routine business will be conducted by  
4 telephone, videoconference, and email. The TSC will also operate as a Data Monitoring Committee  
5 with responsibility to monitor the overall conduct of the trial. There will be a time lag between  
6 practices 'entering the trial' and data availability from cancer registries. The time lag will be such  
7 that data will only be available once practices have completed data collection. Therefore, interim  
8 analyses to assess whether the trial was effective, and to support a decision whether to stop the trial  
9 early, would be unnecessary as data collection (and practice participation) would have already ceased.  
10  
11  
12  
13  
14  
15  
16

### ***Trial Management Group***

17 A TMG has been established and includes those responsible for the day-to-day management of the  
18 trial and those supporting the delivery of the trial and associated stakeholders, including  
19 representatives of the Local Clinical Research Networks (LCRN) and Macmillan. The group will monitor  
20 all aspects of the conduct and progress of the trial, ensure that the protocol is adhered to and take  
21 appropriate action to safeguard participants and the quality of the trial itself. The group will meet  
22 regularly (monthly in the first instance, until recruitment has completed) in person and/or by  
23 phone or over the internet (via MS Teams).  
24  
25  
26  
27  
28  
29  
30  
31

### ***Core Study Team***

32 The core study team (Chief investigator, Trial Manager (TM)) will meet weekly during the study. Day-  
33 to-day running of the trial will be the responsibility of the TM. The TM will have access to the ExeCTU  
34 suite of standard operating procedures (SOPs) and will ensure that the trial is run in compliance with  
35 all relevant SOPs (e.g., assessment, processes and reporting, data management, study staff health and  
36 safety).  
37  
38  
39  
40  
41  
42  
43  
44  
45

### ***Nested Studies***

#### **Health Economics**

46 We will estimate the cost and cost-effectiveness of the eRATs versus usual diagnostic practice using  
47 the primary perspective of the NHS and Personal Social Services (i.e. third-party payer). We will  
48 estimate the cost-effectiveness of the intervention based upon the primary outcome and secondary  
49 survival outcomes (30-day and 1-year; 5-year survival will be a subsidiary report) for the six cancer  
50 sites with eRATs and report the results using the latest guidelines.<sup>(41)</sup> For three cancer sites we will  
51 use decision analytic models to combine data from the within-trial analysis of ERICA intervention on  
52 costs and benefits, with longer estimates derived from the evidence synthesis of the costs and benefits  
53  
54  
55  
56  
57  
58  
59  
60



1 of stage of diagnosis and disease progression to estimate the cost per Quality Adjusted Life Year  
2 (QALY) over the longer term.(42) For fuller details see Appendix B.  
3  
4

### 5 **Service Delivery Modelling**

6 This will investigate the key factors central to the (re) organisation of NHS diagnostic services for  
7 cancer referrals. We will use a range of methods, both quantitative and qualitative, to analyse service  
8 delivery alternatives. Specifically, we will aim to use modelling approaches to explore the likely  
9 implications of different scenarios across dimensions of performance, outcomes and costs. Fuller  
10 details are in Appendix C.  
11  
12  
13  
14  
15

### 16 **Process Evaluation**

17 The process evaluation work aims to identify and investigate the contextual factors that impact upon  
18 the effectiveness of the eRATs with a particular focus on intervention fidelity and GP engagement. The  
19 impact of the eRATs on the patients' experience of their GP consultation and their experiences of  
20 subsequent care will also be explored. Fuller details are in Appendix D.  
21  
22  
23  
24  
25

### 26 **GP Workload**

27 This nested study aims to explore, in terms of consultation time, the impact of GPs using eRATs on GP  
28 workload and patient 'flow' through consulting sessions. It will also explore workload in the week  
29 following the index consultation in which an eRAT was activated. Fuller details are in Appendix E.  
30  
31  
32  
33  
34  
35

### 36 **Patient and Public Involvement and Engagement**

37 Our Patient and Public Involvement and Engagement (PPIE) group, including cancer survivors, have  
38 been consulted widely during the development of this study. The PPIE group have reviewed and  
39 commented on the protocol and supported the development of all patient-facing materials including  
40 information sheets and study lay summaries. One experienced PPIE representative sits on the TMG  
41 and another is on the TSC. A total of seven people have joined our PPIE group for this study and will  
42 contribute by reviewing study materials and documentation, commenting upon and proof reading  
43 reports and contributing to dissemination activities. This group will be supported in their work by the  
44 South West Peninsula Applied Research Collaboration (PenARC) PPIE team, for example by attending  
45 workshops on critical appraisal skills. All PPIE representatives will be recompensed for their time given  
46 to the study.  
47  
48  
49  
50  
51  
52  
53  
54  
55

### 56 **Dissemination policy**

1 A trial publication policy will be developed which outlines the plan for dissemination and will be in  
2 accordance with the International Committee of Medical Journal Editors. The results of the trial will  
3 be reported first to study collaborators and to the funder. The main report will be drafted by the TMG  
4 and circulated to all collaborators and the TSC for comment.  
5  
6  
7

8 Access to the final trial datasets will be made publicly available unless contractual agreements  
9 between data providers limit such access.  
10  
11  
12

### 13 **Ethical review**

14 The trial has received favourable Ethical review from London City & East Research Ethics committee,  
15 reference number 19/LO/0615, with five amendments between then and 2022, relating to two main  
16 areas: the delays caused by the COVID-19 pandemic, with its recruitment moratorium, and an  
17 alteration in the mechanism by which the eRATs software were delivered. Current version – V 5.0,  
18 9<sup>th</sup> May 2022.  
19  
20  
21  
22  
23  
24

25 **Author contributions:** The protocol was written by RC, LM, SD, GA, AS, EF, and MP under the overall  
26 editorial control of WH. All authors have contributed to revision of the protocol.  
27  
28  
29

30 **Funding statement:** This research is funded by a philanthropic donation by The Dennis and Mireille  
31 Gillings Foundation, The University of Exeter, and Cancer Research UK, plus support from Macmillan  
32 in provision of staff time. The trial is registered with ISRCTN: (trial no: ISRCTN22560297) and on the  
33 CRUK trial registry (CRUK database no: 16163).  
34  
35  
36  
37  
38

39 **Acknowledgements:** We would like to thank the NIHR Clinical Research Network for their support  
40 with recruitment, Macmillan for their contributions to the early eRAT work and ongoing support with  
41 practice recruitment and pilot testing. SD's time is partially supported by the National Institute of  
42 Health Research Applied Research Collaboration (ARC) South-West Peninsula.  
43  
44

45 **Disclaimer:** The views expressed are those of the authors and not necessarily those of the NHS, the  
46 NIHR or Department of Health.  
47  
48  
49  
50  
51

52 **Competing interests statement:** WH has intellectual property rights to the original RATs, though has  
53 never sought to commercialize these. All other authors: no competing interests to declare.  
54  
55  
56  
57  
58  
59  
60

## References

1. Richards MA. The size of the prize for earlier diagnosis of cancer in England. *Br J Cancer*. 2009;101.
2. Richards M, Thorlby R, Fisher R, Turton C. *Unfinished business: An assessment of the national approach to improving cancer services in England 1995–2015*. London; 2018.
3. NHS England. (2019) *The NHS Long Term Plan* [Available from: <https://www.longtermplan.nhs.uk/>].
4. de Koning HJ, van der Aalst CM, de Jong PA, Scholten ET, Nackaerts K, Heuvelmans MA, et al. Reduced Lung-Cancer Mortality with Volume CT Screening in a Randomized Trial. *New England Journal of Medicine*. 2020;382(6):503-13.
5. Richards M. *THE INDEPENDENT REVIEW OF ADULT SCREENING PROGRAMMES*. NHS England; 2019. Contract No.: 01089.
6. Landy R, Pesola F, Castanon A, Sasieni P. Impact of cervical screening on cervical cancer mortality: estimation using stage-specific results from a nested case-control study. *Br J Cancer*. 2016;115(9):1140-6.
7. Abel GA, Mendonca SC, McPhail S, Zhou Y, Elliss-Brookes L, Lyratzopoulos G. Emergency diagnosis of cancer and previous general practice consultations: insights from linked patient survey data. *British Journal of General Practice*. 2017.
8. Hamilton W, Walter FM, Rubin G, Neal RD. Improving early diagnosis of symptomatic cancer. *Nature Reviews Clinical Oncology*. 2016;13:740.
9. Hamilton W, Peters TJ, Round A, Sharp D. What are the clinical features of lung cancer before the diagnosis is made? A population based case-control study. *Thorax*. 2005;60(12):1059-65.
10. NICE. *Suspected cancer: recognition and referral [NG12] 2015* [Available from: <https://www.nice.org.uk/guidance/ng12>].
11. Hamilton W, Green T, Martins T, Elliott K, Rubin G, Macleod U. Evaluation of risk assessment tools for suspected cancer in general practice: a cohort study. *British Journal of General Practice*. 2013;63(606):e30-e6.
12. Price S, Spencer A, Medina-Lara A, Hamilton W. Availability and use of cancer decision-support tools: a cross-sectional survey of UK primary care. *British Journal of General Practice*. 2019;69(684):e437.
13. Medina-Lara A, Grigore B, Lewis R, Peters J, Price S, Landa P, et al. Cancer diagnostic tools to aid decision-making in primary care: mixed-methods systematic reviews and cost-effectiveness analysis. *Health technology assessment (Winchester, England)*. 2020;24:66.
14. Rubin G, Walter FM, Emery J, Hamilton W, Hoare Z, Howse J, et al. Electronic clinical decision support tool for assessing stomach symptoms in primary care (ECASS): a feasibility study. *BMJ Open*. 2021;11(3):e041795.
15. Kostopoulou O, Arora K, Pálfi B. Using cancer risk algorithms to improve risk estimates and referral decisions. *Communications Medicine*. 2022;2(1):2.
16. Hamilton W. Diagnosing symptomatic cancer in the NHS. *BMJ : British Medical Journal*. 2015;351:h5311.
17. Møller H, Gildea C, Meechan D, Rubin G, Round T, Vedsted P. Use of the English urgent referral pathway for suspected cancer and mortality in patients with cancer: cohort study. *BMJ*. 2015;351.
18. Elliss-Brookes L, McPhail S, Ives A, Greenslade M, Shelton J, Hiom S. Routes to diagnosis for cancer - determining the patient journey using multiple routine data sets. *Br J Cancer*. 2012;107.
19. Hamilton W. The CAPER studies: five case-control studies aimed at identifying and quantifying the risk of cancer in symptomatic primary care patients. *Br J Cancer*. 2009;101 Suppl 2:S80-6.
20. Hamilton W, Peters TJ, Bankhead C, Sharp D. Risk of ovarian cancer in women with symptoms in primary care: population based case-control study. *BMJ*. 2009;339:b2998.

21. Hamilton W, Round A, Sharp D, Peters TJ. Clinical features of colorectal cancer before diagnosis: a population-based case-control study. *Br J Cancer*. 2005;93(4):399-405.
22. Shephard E, Neal R, Rose P, Walter F, Hamilton WT. Clinical features of kidney cancer in primary care: a case-control study using primary care records. *The British journal of general practice : the journal of the Royal College of General Practitioners*. 2013;63(609):e250-5.
23. Shephard EA, Stapley S, Neal RD, Rose P, Walter FM, Hamilton WT. Clinical features of bladder cancer in primary care. *The British journal of general practice : the journal of the Royal College of General Practitioners*. 2012;62(602):e598-604.
24. Stapley S, Peters TJ, Neal RD, Rose PW, Walter FM, Hamilton W. The risk of oesophago-gastric cancer in symptomatic patients in primary care: a large case-control study using electronic records. *Br J Cancer*. 2013;108(1):25-31.
25. NICE. Suspected cancer: recognition and referral [NG12]2015. Available from: <http://www.nice.org.uk/guidance/NG12>.
26. Macmillan. (2015) Rapid referral guidelines [available at: [https://www.macmillan.org.uk/\\_images/rapid-referral-toolkit-desktop\\_tcm9-291864.pdf](https://www.macmillan.org.uk/_images/rapid-referral-toolkit-desktop_tcm9-291864.pdf)].
27. Cancer Research UK. (2017) Cancer Stats 2017 [Available from: <http://www.cancerresearchuk.org/health-professional/cancer-statistics>].
28. Collins GS, Altman DG. Identifying patients with undetected gastro-oesophageal cancer in primary care: External validation of Qcancer(R) (Gastro-Oesophageal). *European journal of cancer (Oxford, England : 1990)*. 2013;49(5):1040-8.
29. Hamilton W, Stapley S, Campbell C, Lyratzopoulos G, Rubin G, Neal R. For which cancers might patients benefit most from expedited symptomatic diagnosis? Construction of a ranking order by a modified Delphi technique. *BMC Cancer*. 2015;15:820.
30. McPhail S, Johnson S, Greenberg D, Peake M, Rous B. Stage at diagnosis and early mortality from cancer in England. *Br J Cancer*. 2015;112(s1):S108-S15.
31. Shephard EA, Neal RD, Rose PW, Walter FM, Hamilton W. Symptoms of adult chronic and acute leukaemia before diagnosis: large primary care case-control studies using electronic records. *British Journal of General Practice*. 2016;66(644):e182-e8.
32. UK CR. Statistics by Cancer Type 2022 [Available from: <https://www.cancerresearchuk.org/health-professional/cancer-statistics/statistics-by-cancer-type>].
33. Barclay ME, Lyratzopoulos G, Greenberg DC, Abel GA. Missing data and chance variation in public reporting of cancer stage at diagnosis: Cross-sectional analysis of population-based data in England. *Cancer Epidemiology*. 2018;52:28-42.
34. Campbell JL, Fletcher E, Britten N, Green C, Holt TA, Lattimer V, et al. Telephone triage for management of same-day consultation requests in general practice (the ESTEEM trial): a cluster-randomised controlled trial and cost-consequence analysis. *The Lancet*. 2014;384(9957):1859-68.
35. Downs M, Turner S, Bryans M, Wilcock J, Keady J, Levin E, et al. Effectiveness of educational interventions in improving detection and management of dementia in primary care: cluster randomised controlled study. *BMJ*. 2006;332(7543):692.
36. Flottorp S, Oxman AD, Håvelsrud K, Treweek S, Herrin J. Cluster randomised controlled trial of tailored interventions to improve the management of urinary tract infections in women and sore throat. *Bmj*. 2002;325(7360):367.
37. National Disease Registration Service:. Case-mix adjusted percentage of cancers diagnosed at stages 1 and 2 in England, by Clinical Commissioning Group2020 25 Jan 2022. Available from: <https://www.gov.uk/government/statistics/case-mix-adjusted-percentage-cancers-diagnosed-at-stages-1-and-2-by-ccg-in-england/national-disease-registration-service-case-mix-adjusted-percentage-of-cancers-diagnosed-at-stages-1-and-2-in-england-by-clinical-commissioning-group>.
38. Lyratzopoulos G, Abel GA, Brown CH, Rous BA, Vernon SA, Roland M, et al. Socio-demographic inequalities in stage of cancer diagnosis: evidence from patients with female breast, lung, colon, rectal, prostate, renal, bladder, melanoma, ovarian and endometrial cancer. *Annals of Oncology*. 2012;24(3):843-50.
39. Bozdogan H. Model selection and Akaike's Information Criterion (AIC): The general theory and its analytical extensions. *Psychometrika*. 1987;52(3):345-70.

- 1  
2  
3  
4  
5  
6  
7  
8  
9  
10  
11  
12  
13  
14  
15  
16  
17  
18  
19  
20  
21  
22  
23  
24  
25  
26  
27  
28  
29  
30  
31  
32  
33  
34  
35  
36  
37  
38  
39  
40  
41  
42  
43  
44  
45  
46  
47  
48  
49  
50  
51  
52  
53  
54  
55  
56  
57  
58  
59  
60
40. Lyratzopoulos G, Abel GA, Brown CH, Rous BA, Vernon SA, Roland M, et al. Socio-demographic inequalities in stage of cancer diagnosis: evidence from patients with female breast, lung, colon, rectal, prostate, renal, bladder, melanoma, ovarian and endometrial cancer. *Ann Oncol*. 2013;24(3):843-50.
41. Husereau D, Drummond M, Augustovski F, de Bekker-Grob E, Briggs AH, Carswell C, et al. Consolidated Health Economic Evaluation Reporting Standards 2022 (CHEERS 2022) statement: updated reporting guidance for health economic evaluations. *BMJ*. 2022;376:e067975.
42. Weinstein MC, O'Brien B, Hornberger J, Jackson J, Johannesson M, McCabe C, et al. Principles of Good Practice for Decision Analytic Modeling in Health-Care Evaluation: Report of the ISPOR Task Force on Good Research Practices—Modeling Studies. *Value in Health*. 2003;6(1):9-17.

For peer review only

1  
2  
3  
4  
5  
6  
7  
8  
9  
10 **A pragmatic cluster randomised controlled trial assessing the clinical effectiveness and cost-**  
11 **effectiveness of electronic risk-assessment for cancer for patients in general practice (ERICA):**  
12

13 **Appendices**  
14  
15  
16  
17  
18  
19  
20  
21  
22  
23  
24  
25  
26  
27  
28  
29  
30  
31  
32  
33  
34  
35  
36  
37  
38  
39  
40  
41  
42  
43  
44  
45  
46  
47  
48  
49  
50  
51  
52  
53  
54  
55  
56  
57  
58  
59  
60

For peer review only

### ***Appendix A. Managing practice splits and mergers in analyses***

Although we will exclude practices that report imminent restructuring during recruitment, there may be unforeseen mergers or splits of practices. Where mergers and splits are concerned, this could mean, for example, that some of our practices who were in the control arm may merge with an intervention practice. Similarly, a non-trial practice may become part of a trial practice (intervention or control). Changes in practice size have implications on the denominator – the number of patients that each practice is likely to be contributing to our sample – and is a particular issue for three of our secondary outcome measures based on rates (cancer diagnosis rate, two-week wait referral rate, and adverse event rate). Importantly, however, this issue is not a problem for our primary outcome of staging.

We define a split and mergers as follows: Split – Where a population of patients registered to a single practice with a single practice code become registered with two or more individual practices with different practice codes. The practice codes of the new practices may be new codes (i.e. did not exist prior to the split) or one may inherit the original practice code (although this is not a requirement). The change in registration of patients must occur to a substantial number of patients and not at their request. Merger – Where a population of patients registered to one or more practices with different practice codes become registered at a single individual practice with a single practice code. The practice code of the new practice may be a new code (i.e., did not exist prior to the split) or it may inherit one of the original practice codes. A federation is not a “merger” in these terms.

Excluding who restructure during the trial may unnecessarily reduce our power. Therefore, we will try and accommodate changes in status. The Table outlines our approach. The assumption is that the change takes place at time T. Any practice which splits goes from X to Y and Z, and mergers are Z plus Y becoming X. Intervention practices are I, and comparison practices C.

Practice size fluctuations will be monitored in real time. Practice size data are freely and publicly available from NHS Digital and are updated monthly. Each month during the data collection, the trial statistician will download the practice size data and inspect size for all the practices in the trial (the statistician will remain blinded to outcome allocation). If the practice size differs by more than 10% the statistician will alert the trial manager, who will contact the research champion in the relevant practice to explore the reasons for this practice size change. Reasons (e.g., mergers, splits) will be recorded.

**Table: managing changes in practice size – mergers and splits**

| Split or merger                                                                                                                                                                                                                                                      | X pre change | Y pre change | Z pre change | X post change | Y post                                                                                                 | Z post |
|----------------------------------------------------------------------------------------------------------------------------------------------------------------------------------------------------------------------------------------------------------------------|--------------|--------------|--------------|---------------|--------------------------------------------------------------------------------------------------------|--------|
| <b>Split</b>                                                                                                                                                                                                                                                         | I            |              |              |               | I                                                                                                      | I      |
|                                                                                                                                                                                                                                                                      | C            |              |              |               | C                                                                                                      | C      |
| We will allow the daughter practices to withdraw from the trial if they desire, which would mean we lose Y or Z (or both). If daughter practices decide to withdraw, we will include data up to time T plus 2 months to allow for average diagnostic time to cancer. |              |              |              |               |                                                                                                        |        |
| <b>Merger</b>                                                                                                                                                                                                                                                        |              | I            | I            | I             |                                                                                                        |        |
|                                                                                                                                                                                                                                                                      |              | I            | C            | I             | There is likely to be wash over under these conditions, so the merged practice will be considered as I |        |
|                                                                                                                                                                                                                                                                      |              | I            | Non-trial    | I             |                                                                                                        |        |
|                                                                                                                                                                                                                                                                      |              | C            | Non-trial    | C             |                                                                                                        |        |
|                                                                                                                                                                                                                                                                      |              | C            | C            | C             |                                                                                                        |        |

We will manage changes in practice size at the data analysis stage of the trial. Where changes in list size of more than 10% within a month are seen, data for that practice will not be included in the analysis of rate outcomes from one month prior to the drop. There are two exceptions to this; 1) splits where all the daughter practices remain in the trial and we continue to treat them as a single practice for rate analyses, 2) mergers where merged practices are in the same arm of the trial, and we will analyse them as a single practice from the start for rate analyses.

**Appendix B**

**Health Economics**

**Intervention costings.** The resources used in developing the training materials and videos (preparation and IT support) will be collected from the trial manager; nationally applicable unit costs will be applied. Estimates of the extent to which these videos are watched by practice staff will be based on information available from the website platform hosting the videos. Information on the resources use to install the eRATs onto the EMIS and SystmOne practice IT systems will be estimated in consultation with practice champions. These estimates will additionally aim to estimate: 1) the cost



1 of installation in the trial and 2) the anticipated cost of future installation should eRATS be  
2 implemented nationally.  
3  
4  
5

6 **Health related quality of life and resource use.** The Health Economics analysis will draw on the  
7 estimated number of imaging investigations (colonoscopies, sigmoidoscopies, upper gastro-intestinal  
8 endoscopies, chest x-rays, abdominal ultrasounds, and abdominal CT scans) using data from the  
9 Diagnostic Imaging Dataset available in the main trial as well as estimates of GP workload from the  
10 process evaluation.  
11  
12  
13  
14  
15

16 To investigate whether the eRATs intervention was associated with a change in health-related quality  
17 of life using the EQ5D-5L and to provide more detailed information on primary care services and tests  
18 used, we will sample patients in the intervention arm who had a consultation where an eRAT alert  
19 occurred, and patients in the control arm who had a consultation where an eRAT alert would have  
20 occurred. We will strategically target practices in both trial arms who have either high, medium, or  
21 low two-week wait referral rates, matching the minimisation criteria in the main trial. It is anticipated  
22 that 15-20 patients per practice over a 2-week period will have a consultation with an eRAT alert. All  
23 patients who have an eRAT alert will be invited to complete a baseline questionnaire and a 3 month  
24 follow-up Health Economics questionnaire, as will equivalent patients in the control arm. We  
25 anticipate that 40% of patients will accept, and of these there will be 20% who do not respond. With  
26 a conservative estimate of a cluster size of five patients responding to the questionnaire. Using an  
27 minimum clinically important difference of 0.1 for the EQ5D-5L (2) and a standard deviation of 0.23(3),  
28 with an inter-cluster correlation coefficient of 0.03 (4), and an estimated coefficient of variation of  
29 cluster size of 0.7, the sample size required to detect a between group difference with 90% power and  
30 alpha of 0.05 was 28 clusters (140 participants) per arm. Participants who agree to take part will  
31 receive the questionnaire as a hard copy, through the post, or electronically via email, depending on  
32 the participant's preference. Nationally applicable unit costs will be used for all community health and  
33 social care contacts (5) and secondary care services, tests and investigations will be costed using the  
34 National Schedule of Reference Costs 2016-2017 (6).  
35  
36  
37  
38  
39  
40  
41  
42  
43  
44  
45  
46  
47  
48  
49  
50  
51

### 52 **Decision Analytic Model**

53 The modelling aims to predict the expected impact of a change in stage of diagnosis, and any resulting  
54 change in the distribution of cancer stage at diagnosis (intervention vs. control) over time, building on  
55 the published literature in this area.(9, 10) The decision analytic models will not need to separately  
56 model the diagnostic phase, and we will take the trial's primary outcomes, stage at diagnosis (Stage  
57  
58  
59  
60

1-4 separately and not collated into Stage 1-2 and Stage 3-4), to model the longer term effects on survival, QALYs and secondary care costs.

Scenario analysis will be used to examine the impact on the results of multiple parameters changing simultaneously (based on *a priori* judgement about the combination of parameters to include).(11)

Probabilistic sensitivity analysis will be used to explore the proportion of results that are considered cost-effective in relation to a given cost-effectiveness threshold and these results will be illustrated graphically using a cost-effectiveness acceptability curve.(12)

The study will follow the CHEERs guidelines for reporting cost-effectiveness studies and models,(13) and will discount both costs and outcomes at 3.5% as recommended by the National Institute of Health and Care Excellence.(14) Sensitivity analyses will examine alternative assumptions about the missing data mechanisms.(15)

## Service Evaluation

We will draw upon published systematic reviews of Quality of Life measures, that are based on public preferences and measured in patients (as required by NICE guidelines (16) and that have been used for economic evaluation modelling studies.(17)

## Appendix C

### Service Delivery Modelling

#### *Background and rationale*

Cancer diagnosis has become one of the principal areas of focus and concern for the NHS in England.(18) For some time, NHS performance in both early diagnosis, delays in referral, and associated survival rates has been poor relative to our national aspirations and when compared with other first world countries. This has worsened during the COVID pandemic. In this context, many of the issues of concern are centred on key aspects of service delivery. How the NHS organises its services is often pivotal in determining the cost, feasibility, and effectiveness. For instance, factors such as workforce availability, prioritisation, service location, scale, and resources are fundamental to the performance of the NHS in delivering effective cancer services.

This component of the ERICA programme will investigate the key factors central to the organisation of NHS diagnostic services for cancer referrals. We will use a range of methods, both quantitative and qualitative, to analyse service delivery alternatives. Specifically, we will aim to build an economic model to assess the likely implications of different scenarios. Implementation of the eRAT diagnostic

1 tool at primary care level is likely to impact directly on the follow-on pathway for cancer diagnosis (for  
2 example in terms of the volume and case mix of referred patients for diagnosis). Our model will  
3 therefore provide an assessment of the likely effect of this impact in terms of costs and performance,  
4 and highlight any changes in organisation that might be implied by the introduction of the eRAT tool.  
5  
6  
7  
8  
9

10 This research will run in parallel with the substantive work conducted for the controlled trial of eRAT  
11 implementation within ERICA. It will also liaise closely with the detailed and standard analysis of cost-  
12 effectiveness for disease progression (which is inherently abstracted from the service delivery aspects  
13 of care) in order to provide an added dimension to the cost-effectiveness outputs from the ERICA  
14 study as a whole.  
15  
16  
17  
18

### 19 **Objectives**

20 To build and populate a model of the cancer diagnostic pathway for England, in order to provide an  
21 assessment of the costs and effectiveness of different scenarios for service delivery. In particular, we  
22 will investigate the potential aspects relative to implementation of eRATs based on the study data  
23 collected from the ERICA trial. In addition, qualitative research with NHS staff in secondary care will  
24 be used to assess key areas central to successful implementation and sustainability.  
25  
26  
27  
28  
29

### 30 **Methods**

31 A wide range of methods will be essential to fulfil the objectives of the work outlined here. Early work  
32 will include a literature search and survey of current systems for diagnostics in cancer. We will  
33 therefore conduct a systematic review of the related literature in the field and carry out a survey of  
34 current service delivery organisation across a range of settings. This work will aim to identify the key  
35 factors bearing on the organisation of services such a regional variation, metropolitan versus rural  
36 context, and population case mix differences.  
37  
38  
39  
40  
41  
42

43 Phase two work will aim to build a model in order to capture the key elements of service delivery for  
44 diagnostic services for cancer. This will explore a range of modelling approaches and test which is most  
45 suited to specific needs. For example, discrete event simulation, Systems Dynamics, geographic  
46 analysis, and Markov modelling will all be tested in terms of their relevance and appropriateness to  
47 specific requirements. In this context it is highly likely that different modelling tools will be relevant to  
48 the diverse needs of the study, so no single approach will be dominant.  
49  
50  
51  
52  
53

54 Phase three will focus on the service delivery implications for the introduction of the eRAT diagnostic  
55 tool in primary care looking particularly at the potential knock-on effects in other areas of service.  
56  
57  
58  
59  
60

1 In addition to our modelling work, we will use qualitative methods, such as problem structuring  
2 methods, soft systems mapping, to provide an assessment of some key elements of implementation.  
3  
4

### 5 *Data*

6 A wide range of data will be used to complete this component of the work. We will aim to integrate  
7 sources from across routinely collected datasets such as those listed below to construct our models:  
8 NHS activity data, Waiting time data, Reference cost data, Diagnostic Imaging Data (DIDs), Hospital  
9 Episode Statistics (HES), Workforce reference data, GP and hospital referral data, QOF data,  
10 Population data (e.g. ONS). In addition, we will aim to incorporate the primary data derived from the  
11 main ERICA study in order to model and assess the pathway impact from the use of eRATs. We will  
12 also use the outputs from the standard economic analysis as an input for the cost effectiveness of the  
13 service delivery modelling. Output from the qualitative research will also provide important data for  
14 informing the outputs of this work, for example in feeding into the recommendations and conclusions  
15 of the study.  
16  
17  
18  
19  
20  
21  
22  
23  
24  
25

## 26 **Appendix D**

### 27 *Process Evaluation*

#### 28 *Scope of process evaluation*

29 The process evaluation work aims to identify and investigate the contextual factors that impact upon  
30 the effectiveness of the eRATs with a particular focus on intervention fidelity and GP engagement. The  
31 impact of the eRATs on the patients' experience of their GP consultation and their experiences of  
32 subsequent care will also be explored. It is underpinned by the COM-B framework for understanding  
33 behaviour change (19). This framework will outline the interactive nature of how the GP's capability  
34 (IT skill for using the eRATs), opportunity (eRAT prompts), and motivation (to do the training and use  
35 all the eRAT features) might influence their behaviour – i.e., ongoing use of the eRATs, symptom  
36 checker, coding of symptoms and changes to referral letters). We will use a mixed-methods approach  
37 to explore how the intervention was delivered (including fidelity and dose - if the eRATs were being  
38 used as intended and their degree of use across intervention practices and over time) and GP  
39 engagement with and acceptability of using the eRATs (GP's experiences of the eRATs).(20) For  
40 delivery, we will be particularly interested in fidelity of function. (21) GPs will be given clear training  
41 videos on how to use the eRATs and we will explore the extent to which GPs engaged with training as  
42 well as how they subsequently engaged with the software, and the GP's experiences of how it  
43 impacted on the GP-patient relationship in order to evaluate how they responded to the intervention.  
44  
45  
46  
47  
48  
49  
50  
51  
52  
53  
54  
55  
56  
57  
58  
59  
60

## Methods

*Intervention fidelity and GP engagement (intervention arm only):* Prior to the start of the intervention GPs require a minimum level of training in how to use the eRATs. Although the software is designed to be intuitive, a clinical system specific walkthrough for the two main functions of the eRATs (prompt and symptom checker) and FAQs will be available via separate videos. The research champion will be given access to the videos and can disseminate the video content to all GPs in the practice (by showing the videos during a practice meeting, providing a demonstration themselves, or passing on the weblink). Once practices have started the data collection phase, we will invite up to 10 research champions to interview to discuss in depth their experiences of the set-up and training procedures and to explore whether their GPs have the capability, opportunity and motivation to use the eRATs. We will purposively sample research champions based on whether they are from a practice with a high, middle or low two-week wait referral rate, which software system their practice uses, their gender, and their level of experience in practice (10+ years vs. less than 10 years in practice).

Detailed eRAT usage can be captured for all IT systems. Usage will be captured in two ways – i) via a central log and ii) via local 'at practice' reports. For i), usage logs will be routinely and automatically sent from the practice to the Informatica 'digital warehouse' and will contain anonymised, practice-level data for each eRAT including reports of: how many times the prompt was shown, how many times the symptom checker was used, the number of times the symptoms were changed during use of the symptom checker, the length of time the symptom checker was open for, and whether clinical guidance was accessed from the eRAT. These centrally reported logs will be available on a monthly basis throughout the course of the trial and will be securely sent from Informatica to the research team who will add the data to the trial database.

For ii), usage will be examined via reports run locally at each practice. These reports include individual patient level data outlining which eRAT was triggered, the patient's risk score on the eRAT, when the symptom checker was opened and closed, patient's age and sex, and a list of possible eRAT symptoms and whether they were changed. These reports contain depersonalised (pseudo-anonymised) data. As it is possible to potentially identify the patient via the practice ID number we will ask practices to make a copy of the report, add in a new patient study ID variable (e.g., p1, p2, p3, etc) and save it to the practice computer. We will then ask them to send a copy to the trial team with the original practice ID number removed. They will also send the file with a predetermined practice ID number. These measures should ensure the data is anonymised. The local at practice reports will be securely and electronically transferred to a secure Exeter CTU computer.

1 Intervention fidelity (Intervention and control). We will ask all research champions in the intervention  
2 practice to complete a short questionnaire (online via a secure, University approved provider)  
3 detailing their experience of installing software, using the eRATs, and whether alternative risk tools  
4 have also been used. We will ask research champions at control practices their experiences of being  
5 in the trial and whether they have started using any cancer risk tools. The questionnaires will be  
6 completed at two time points – i) within 12 months of the start of the intervention; ii) at the end of  
7 the data collection period.  
8  
9  
10  
11  
12

13  
14  
15 For identifying GPs to interview, we will use maximum variation purposive sampling (sampling on  
16 practice two-week wait referral rate (high vs. medium vs. low); software system used, gender, length  
17 of time in practice (10+years vs. < 10 years), and working status (part time vs full time)) and expect to  
18 interview up to 18 GPs from intervention practices to ask them about their experience of the eRATs  
19 including the training provided, any impacts on the consultation and their clinical decision making, as  
20 well as any changes in symptom coding behaviour. We will invite GPs to interview after the  
21 intervention has been running for at least 3 months. Written information will be provided about the  
22 interview study and written consent will be taken prior to the interview and will be verbally confirmed  
23 before the interview commences. Interviews will be audio-recorded and carried out by telephone,  
24 face-to-face (only if it is safe to do so), or over the internet (e.g., Zoom or MS Teams) depending on  
25 the GPs preference, by members of the research team using a pre-defined topic guide that focuses on  
26 their training and capability to use eRATs, their opportunity to use the eRATS over the study period  
27 and their motivation to continue using the system. If a face-to-face interview is chosen (and safe to  
28 perform), interviews will take place in a private room at the practice. The researcher will comply with  
29 the lone worker policy, ensuring that have a 'buddy' within the research team monitoring their  
30 activities and whereabouts. The interviews may raise sensitive issues such as workload and GP  
31 overburden or burnout: the interview study information sheet will provide appropriate sources for  
32 accessing confidential support. GPs will be reminded that they have the right to not answer any  
33 question, stop the interview or withdraw from the interview study; if there is insufficient time to fully  
34 discuss issues GP's will be offered a follow-up time to complete the interview.  
35  
36  
37  
38  
39  
40  
41  
42  
43  
44  
45  
46  
47  
48  
49

50 *GP coding behaviour:* It is possible that the eRATs will impact GP coding behaviour - GP coding  
51 behaviour for cancer specific symptoms may increase; this would cause a minor increase in triggering  
52 of eRATs. We will explore the impact of eRATs on coding behaviour in the interviews (see above) and,  
53 resources permitting, will also examine the impact on coding rates using the following approach. We  
54 will purposively sample 12 intervention practices and 12 control practices in the South/South West of  
55 England based on two-week wait referral rate (i.e., 4 low, 4 moderate, 4 high referring practices) and  
56 which software system is being used. In the first instance we will invite practices who are participating  
57  
58  
59  
60

1 in the nested study to support this work. If insufficient numbers agree, we will approach other  
2 practices who are not participating in the nested studies. We will explore the rate of coding of the  
3 most frequent symptom for each eRAT cancer in the study that underpins that particular cancer (e.g.  
4 cough, abdominal pain, haematuria)(22-25) for a month in the first three months of entry into ERICA,  
5 and for the same calendar month a year and two years later (as some symptoms have seasonal  
6 variation). This will be performed retrospectively, by the search code being given to the research  
7 champion, who will arrange for the search to be conducted in the practice. The results of the search  
8 will be emailed to the research team.  
9

10  
11  
12  
13  
14  
15  
16 *Patient experience of care:* We will adopt a phased, targeted recruitment strategy with an aim to  
17 purposively sample up to (based on two-week rate referral rate (low vs. medium vs. high); gender, age  
18 (40-60 vs. 60+)) 32 patients from the intervention arm. We will approach five practices at a time (and  
19 expect to recruit around 20 practices to reach the target number of participants), to ensure that we  
20 can interview participants in a timely manner.  
21  
22  
23

24  
25  
26 The in-practice eRAT reports are the mechanism by which we will be able to identify individuals to  
27 invite to participate in the activities associated with the process evaluation. The local (at practice)  
28 reporting mechanism will allow the research team to identify individuals for whom the eRATs were  
29 used and thus who are potentially eligible to participate in a semi-structured interview. Purposive  
30 sampling will take place – practices will hold the master eRAT report containing both the patients  
31 practice ID number and the new patient study ID. The research team will let the practice know the  
32 patient study IDs for those whom an invitation letter will be sent.  
33  
34  
35  
36  
37  
38  
39

40 Via the GP practice, the research team will send out a letter and information booklet to the identified  
41 patients to invite participation in an interview to discuss their experience of care. We will adopt a  
42 longitudinal case study design (26) – patients' care pathways will differ, some will receive referrals  
43 into secondary care for investigations and tests, while some will be on a 'watch and wait' plan,  
44 revisiting their GP at an agreed interval. Some patients will have tests for cancer and the test will  
45 indicate that there is no cancer (false positives) whereas some patients will be diagnosed with cancer.  
46 So that we can fully capture all patient groups at different stages of their care, individuals will be  
47 invited for repeat interviews at regular intervals (i.e., at least one month apart and no more than 3  
48 interviews within 12 months).  
49  
50  
51  
52  
53  
54  
55

56 We aim to perform the first interview within one month of the consultation in which an eRAT was  
57 triggered. Written information about the interview study will have been provided and written  
58 informed consent will be taken prior to all interviews, and will be verbally confirmed before the  
59  
60

1 interview commences. Interviews will be audio-recorded and carried out by members of the research  
2 team using pre-defined topic guides. The initial interview will be conducted face-to-face at the  
3 participant's home or via video conferencing software such as MS Teams at a time convenient for the  
4 participant, with any subsequent interview conducted either face-to-face, over the phone, or via video  
5 conference software, depending upon the participant's preference. We will monitor the progression  
6 of the Covid-19 pandemic and fully adhere to government advice around social distancing and travel.  
7 We will not put the research team or participants at risk and will primarily conduct interviews online.  
8 If it is safe to conduct face-to-face interviews, the researcher will comply with the lone worker policy,  
9 ensuring that have a 'buddy' within the research team monitoring their activities, whereabouts and  
10 expected completion time. The interviews may raise anxiety or concerns related to uncertainty about  
11 diagnosis during the referral and investigation period or the watch and wait period; or psychological  
12 distress associated with a cancer diagnosis or a false-positive result. The interview study information  
13 sheet will provide appropriate sources for accessing confidential support and patients will be  
14 reminded that they have the right to not answer any question, stop the interview or withdraw from  
15 the interview study.

#### 26 Management of adverse consequences

27  
28 As a result of being referred for tests or investigations there is a risk of an adverse incident. If referral  
29 rates do increase as a result of access to eRATs, there is an increased risk of an adverse event (AE) to  
30 patients of practices allocated to the intervention. We are not routinely tracking individuals  
31 throughout the trial and there is no mechanism for monitoring any AEs as a result of referral. However,  
32 psychological distress may be a consequence of referral. Individuals for whom cancer is diagnosed at  
33 an early stage may be relieved by the diagnosis and see the psychological distress as justifiable.  
34 Individuals for whom a referral does not lead to a diagnosis of cancer (false positives) may have  
35 undergone unnecessary psychological distress. Our process evaluation work will help us to understand  
36 the extent of this and its potential impact on the individuals' life.

37  
38 During interviews, patients may report being distressed – either as a result of research activity or as a  
39 result of their health, and events in their private lives. Should such a situation arise, the researchers  
40 will implement the trial risk protocol and manage the participant in accordance with this policy.  
41 Participants will be reminded that they have the right to not answer any question, stop the interview  
42 or withdraw from the interview study. Under high-risk situations (e.g., where there is perceived  
43 immediate risk to a participant's health), the study team may be required to break confidentiality, to  
44 inform appropriate authorities who will need to provide essential care services. We will also signpost  
45 participants to sources of support. This information will be outlined in the Participant Information  
46 Sheet. Participants will be informed of possible benefits and known risks of participation in the  
47  
48  
49  
50  
51  
52  
53  
54  
55  
56  
57  
58  
59  
60



1 interviews by means of a Patient Information Sheet and through discussion with the research team.  
2  
3 Written consent will be obtained immediately prior to the interview study.  
4  
5

6 There are minimal risks to researchers as most interviews will take place in the GP practices or by  
7 telephone/online; however, if a home visit is undertaken to interview patient participants the  
8 researcher will follow the lone worker policy: researchers will make sure that their whereabouts,  
9 contact telephone number and estimated time of return are known to their colleagues and/or  
10 manager. Researchers will also have the opportunity to debrief with a senior colleague on the research  
11 team should they need any support after conducting an interview; this debrief may be in person or by  
12 telephone.  
13  
14  
15  
16  
17  
18

### 19 *Analysis*

20 For the quantitative results the individual data sources will be summarised descriptively, including a  
21 summary of data completeness. For the qualitative data we will adopt a framework approach (27)  
22 which allows the inclusion of key concepts and ideas identified from the literature, alongside themes  
23 emerging from the data. The framework approach produces a structured output matrix, with cells of  
24 data organised by practice and by code (a descriptive label applied to a section of transcript).  
25  
26  
27  
28  
29  
30

31 At least two researchers will work on the analysis. Interviews will be audio recorded, transcribed and  
32 anonymised. Data familiarisation will be achieved through the listening to and reading of interview  
33 recordings and transcripts. Transcripts will be imported into the qualitative data analysis software  
34 package NVivo 11 (QSR International) to facilitate data management, sharing and development of a  
35 coding framework. A proportion of the interview transcripts will be coded by each researcher. The  
36 'constant comparative method' (28) will be utilised: each incident in the data will be compared with  
37 other incidents for similarities and differences and any 'negative cases', where a case does not fit the  
38 pattern or cannot be explained by the emerging analysis, will be explored and recorded. Following this  
39 initial coding, a PPIE meeting (one for the GP interviews and one for the patient interviews) will be  
40 held to discuss the emerging themes from the interviews, and to gain alternative perspectives from  
41 the PPIE group on those themes. Following the PPIE meeting, the analytical framework will be  
42 developed, incorporating researcher and PPIE perspectives on the results, with a final set of themes  
43 and codes being agreed upon.  
44  
45  
46  
47  
48  
49  
50  
51  
52  
53

54 The analytical framework will be applied to all interview transcripts; one researcher will index all  
55 transcripts, with a second researcher indexing a proportion, to check the reliability of the indexing and  
56 to ensure that the themes of the framework are being interpreted consistently. Any differences in  
57 interpretation will be discussed between the two researchers. Following the indexing process, data  
58  
59  
60

1 will be charted into the structured output matrix, which will summarise the data on each theme from  
2 all transcripts. A subsequent meeting of the PPIE group will be held once all of the results from the  
3 process evaluation have been gathered to gain a users' perspective of the global findings.  
4  
5  
6  
7

8 The final step in the process evaluation analysis will be to integrate results from the various mixed  
9 method data sources using a triangulation protocol(29) to give a more complete picture once  
10 individual data sources have been individually analysed. We plan to create a summary matrix, known  
11 as a convergence coding matrix, which summarises the findings from each data source after assessing  
12 whether the findings are in agreement, partial agreement or no agreement, or whether the data  
13 source is silent for the finding under consideration i.e. when a theme or finding arises from one data  
14 set but not another.  
15  
16  
17  
18  
19  
20

## 21 Reporting

22 The process evaluation results will be briefly summarised for inclusion in the main trial report and  
23 publication, separate dissemination (reports, presentations and publications) will provide further  
24 details of the process evaluation findings.  
25  
26  
27  
28  
29  
30

## 31 Appendix E

### 32 GP Workload

#### 33 *Background and rationale*

34 GPs manage a high and rising workload of increasingly complex patient care with many competing  
35 demands to attend to within ten-minute consultations. (30) This, combined with ongoing recruitment  
36 and retention challenges, has contributed to a GP workforce 'crisis'. (31-36) The workload implications  
37 for GPs of using electronic tools such as eRATs during consultations is unclear.(37) ERICA provides an  
38 opportunity to examine whether the use of eRATs by GPs, and the possible subsequent discussion of  
39 cancer risk with patients, may impact consultation length and patient 'flow' through consulting  
40 sessions. This nested study aims to explore, in terms of consultation time, the impact of GPs using  
41 eRATs on GP workload and patient 'flow' through consulting sessions. It will also explore workload in  
42 the week following the index consultation in which an eRAT was activated, when relevant letters may  
43 be generated, referrals made, investigations followed through, or clinical discussions engaged in.  
44  
45  
46  
47  
48  
49  
50  
51  
52  
53  
54

#### 55 *Objectives*

56 The specific objectives in respect of consultations and sessions are:  
57  
58  
59  
60

1 (i) to measure and compare the duration of consultations and sessions in which an eRAT has been  
2 activated with consultations where eRATs have not been activated;  
3  
4

5  
6 (ii) to measure and compare the duration of subsequent consultations in the same session after an  
7 eRAT has been activated with consultations in sessions where eRATs have not been activated;  
8  
9

10  
11 (iii) to explore the frequency of interactions with patients' medical records by a GP in the week  
12 following a consultation during which an eRAT was activated.  
13  
14

### 15 *Methods*

16 An observational quantitative study will be conducted in a sub-sample of ERICA intervention practices  
17 to examine the durations of consultations and consulting sessions in which eRATs are activated.  
18  
19

#### 20 *Sample size*

21 The basis for the sub-study sample size calculation is on the number of consultations likely to occur  
22 over a two-week period within ERICA practices, in which an eRAT will be 'activated' (i.e. an eRAT  
23 prompt is shown and/or clinician uses an eRAT symptom checker). A number of assumptions are of  
24 note:  
25  
26  
27  
28  
29

30 The first assumption is that a half-day GP consulting session, typically lasting four hours and comprised  
31 of ten-minute consultations, would be associated with a total of 24 consultations. Second, practices  
32 have an average headcount of seven GPs (informed by GP workforce data from NHS Digital). (38) Third,  
33 a GP is assumed to work an average of 6.7 half-day consulting sessions per week. (39) An average  
34 practice would therefore provide a total of 1,126 GP consultations per week.  
35  
36  
37  
38  
39

40 Accurate estimations of how often an eRAT will be activated, are not yet established in previous  
41 research on usage of cancer decision tools in UK general practice. (40,41) Two clinical members of the  
42 research team have estimated that an eRAT may be expected to be activated once per GP, per week.  
43 This estimate would suggest that approximately 15% of consulting sessions will involve a consultation  
44 where the eRAT tool was activated.  
45  
46  
47  
48  
49

50 The standard deviation for both the length of a consultation and of a whole consulting session from  
51 previous literature was four minutes and 20 minutes respectively. (42-44) Project team discussion  
52 concluded that a minimally important difference in time for an individual consultation would be  
53 between two and five minutes; for a consulting session this minimally important difference would be  
54 approximately 10 minutes.  
55  
56  
57  
58  
59  
60

1 Statistical power to detect a time difference of between two and five minutes in eRAT consultations  
2 versus non-eRAT consultations is also in excess of >80%, even if eRATs are observed to have been  
3 activated in just 1:40 consulting (2.5% of sessions), the basis of the most conservative estimate. The  
4 power to detect a difference of 10 minutes in sessions where eRATs have been activated compared  
5 with sessions where eRATs have not been activated is >80%, even if eRATs affect only 2.5% of sessions.  
6 A two-week observation period would provide sufficient data and power to detect differences in the  
7 length of consultations and sessions where an eRAT is activated and those where an eRAT is not  
8 activated.  
9

## 15 Outcome measures

### 17 Primary outcome

18 The primary outcome is the length of time (in minutes) of consultations. These will be consultations  
19 during which an eRAT is activated and also those during which an eRAT is not activated. For the  
20 purposes of this sub-study, a consultation is defined as starting when the patient's electronic medical  
21 record is opened by a GP, for the purpose of conducting either a face-to-face or telephone/video  
22 interaction with the patient, and ending when the record is closed. Home visits will be excluded due  
23 to difficulty in accessing accurate time information. Consultations with health professionals who  
24 would not make referral decisions (e.g. practice nurses, physiotherapists, pharmacists, healthcare  
25 assistants) will also be excluded.  
26  
27  
28  
29  
30  
31

### 33 Secondary outcomes

34 In addition to our primary outcome, we propose to examine the following secondary outcomes:

- 36 • The length of time (in minutes) of consulting sessions. For the purposes of this study, a session is  
37 defined as a half-day period comprised of individual patients' pre-booked or same-day  
38 consultations. The half-day periods are typically 'morning' or 'afternoon', although some practices  
39 offer early morning and evening sessions as well. (45)
- 41 • The number of instances of opening a patient's electronic medical record in the week following  
42 an eRAT being activated.  
43  
44  
45

### 47 Practice recruitment

48 An initial pilot in up to three ERICA intervention practices will be undertaken and plans for data  
49 collection methods revisited at that point. Practices will be approached by an invitation email and  
50 provided with an information sheet detailing the nature of the study and providing contact details of  
51 the researcher. No individual patients will be recruited.  
52  
53  
54

55  
56  
57 *A note on practice recruitment to the nested studies:* We expect to recruit up to 91 practices across  
58 the nested studies (56 in the health economics nested study, up to 20 in the process evaluation and  
59 up to 15 in the sub-study on GP workload) practices across the nested studies. Practices will only be  
60

1 asked to help with only one of the health economic nested study, the process evaluation nested study,  
2  
3 or the GP workload sub-study – not all three.  
4

### 5 *Data collection*

#### 6 *Identifying consultations where an eRAT is activated*

7  
8 The Process Evaluation describes earlier how a local ‘at practice’ report will be run for practices in  
9 order to collect patient-level data on eRATs usage. This report will be run for practices recruited to  
10 this nested study, covering a two-week period.  
11  
12  
13

#### 14 *Measuring durations of consultations and sessions*

15 The eRATs usage report will provide the start and end time of the tool usage, but not the duration of  
16 a consultation. A further search function (developed within SystemOne for this nested study) will  
17 provide data on the timings of all consultations occurring between two dates (referred to as the  
18 ‘appointments report’). The consultations identified in the eRAT usage report will be cross-referenced  
19 with the consultations in the appointments report. A variable will be added to denote which  
20 consultations involved an eRAT being activated and which did not.  
21  
22  
23  
24  
25

#### 26 *Measuring workload in the week following an eRAT being activated*

27 The eRATs usage report will identify the relevant patient records for which an audit will be run in  
28 SystemOne. The audit will provide data on instances of the records being opened and closed by practice  
29 staff during the week following the index activation of an eRAT.  
30  
31  
32  
33

### 34 *Data analysis*

35 Data will be analysed in Stata. Descriptive statistics summarising participating practices and GPs will  
36 be presented. Although practice level data will be presented, it will be anonymised (e.g. practice A, B,  
37 etc) to protect the identities of individual practitioners or practices.  
38  
39  
40  
41

42 The primary analysis of the durations of consultations in which an eRAT is activated, will take the form  
43 of a mixed-effects linear regression with random intercepts to account for clustering within GPs and  
44 for GPs clustering within practices. This regression will adjust for consulting GP, time of day, day of  
45 week, and consultation mode (face-to-face, telephone, video). Residuals will be checked for normality.  
46 As duration data are typically not normally distributed, the data will be transformed if needed, using  
47 log transformation. Bootstrapping of the data will also be undertaken if needed. Similar mixed-effects  
48 linear regression models with random intercepts will also be performed for secondary outcomes; the  
49 duration of consulting sessions, and the number of instances of opening a patient’s electronic medical  
50 record in the week following an eRAT being activated. For all models where duration is the outcome  
51 linear models will be used, but for the count of opening medical records Poisson models will be used.  
52  
53  
54  
55  
56  
57  
58  
59  
60

## *Governance and ethical considerations*

### *Consent*

Individual patient consent is not sought within ERICA for the running of the eRAT usage report. The reports in SystmOne, described for this nested study, will not contain identifiable patient data nor clinically sensitive information and so patient consent for these reports will also not be sought.

### *Data protection/management and confidentiality*

The eRAT usage report and the SystmOne reports will contain pseudo-anonymised data: a patient identifier. However, the reports will contain variables denoting date, time and consulting GP, which will allow cross-referencing, so practices will be asked to delete the patient identifier before sending the report securely and electronically to a secure Exeter CTU computer using a predetermined practice ID number. These measures will ensure the data are anonymised. In the event that the researcher visits the practice to run the SystmOne reports, the files will be anonymised in the same way before the researcher leaves. Practices will keep the original 'master' report files containing the patient's practice computer ID.

### *Finance*

The additional work for the nested study, outside of ERICA costs, is for practices to run the reports in SystmOne and send the report files securely to the researcher. Alternatively, the researcher will visit the practice to run the reports, which may require time of a practice administrator or manager for logging in to the clinical system and orientation. In both scenarios, this time would be covered by nested study research costs at a rate of £50 per hour, and each practice will be offered reimbursement for up to 2 hours. Travel costs for the researcher to visit practices where needed are estimated at £0.45 per mile for a 75 mile round-trip per practice (South West).

## **References**

1. Neal RD, Din NU, Hamilton W, Ukoumunne OC, Carter B, Stapley S, et al. Comparison of cancer diagnostic intervals before and after implementation of NICE guidelines: analysis of data from the UK General Practice Research Database. *Br J Cancer*. 2014;110(3):584-92.
2. Pickard AS, Neary MP, Cella D. Estimation of minimally important differences in EQ-5D utility and VAS scores in cancer. *Health and quality of life outcomes*. 2007;5:70-.
3. Kind P, Hardman G, Macran S. UK population norms for EQ-5D. Centre for Health Economics, University of York; 1999.
4. Man M-S, Chaplin K, Mann C, Bower P, Brookes S, Fitzpatrick B, et al. Improving the management of multimorbidity in general practice: protocol of a cluster randomised controlled trial (The 3D Study). *BMJ Open*. 2016;6(4):e011261.
5. Curtis L. Unit Costs of Health and Social Care 2020 [Available from: <https://www.pssru.ac.uk/project-pages/unit-costs/unit-costs-2020/>]. 2020.
6. Department of Health and Social Care. NHS reference costs 2019 to 2020 [Available from: <https://improvement.nhs.uk/resources/reference-costs/>]. 2020.

7. Caro JJ, Briggs AH, Siebert U, Kuntz KM. Modeling good research practices--overview: a report of the ISPOR-SMDM Modeling Good Research Practices Task Force-1. Medical decision making : an international journal of the Society for Medical Decision Making. 2012;32(5):667-77.
8. Siebert U, Alagoz O, Bayoumi AM, Jahn B, Owens DK, Cohen DJ, et al. State-Transition Modeling:A Report of the ISPOR-SMDM Modeling Good Research Practices Task Force-3. Medical Decision Making. 2012;32(5):690-700.
9. Schwander B, Hiligsmann M, Nuijten M, Evers S. Systematic review and overview of health economic evaluation models in obesity prevention and therapy. Expert review of pharmacoeconomics & outcomes research. 2016;16(5):561-70.
10. Wang BC, Furnback W. Modelling the long-term outcomes of bariatric surgery: A review of cost-effectiveness studies. Best practice & research Clinical gastroenterology. 2013;27(6):987-95.
11. Andronis L, Barton P, Bryan S. Sensitivity analysis in economic evaluation: an audit of NICE current practice and a review of its use and value in decision-making. Health Technol Assess. 2009;13(29):iii, ix-xi, 1-61.
12. Fenwick E, O'Brien BJ, Briggs A. Cost-effectiveness acceptability curves--facts, fallacies and frequently asked questions. Health economics. 2004;13(5):405-15.
13. Husereau D, Drummond M, Petrou S, Carswell C, Moher D, Greenberg D, et al. Consolidated Health Economic Evaluation Reporting Standards (CHEERS) statement. Value Health. 2013;16(2):e1-5.
14. NICE. Guide to the Methods of Technology Appraisals, Section 5.6 Discounting [Available from: <https://www.nice.org.uk/process/pmg9/chapter/the-reference-case#discounting>]. 2013.
15. Faria R, Gomes M, Epstein D, White IR. A guide to handling missing data in cost-effectiveness analysis conducted within randomised controlled trials. Pharmacoeconomics. 2014;32(12):1157-70.
16. Brazier J, Longworth L. NICE DSU Technical Support Document 8: An introduction to the measurement and valuation of health for NICE submissions. In: Health, editor. 2011.
17. Tengs TO, Wallace A. One thousand health-related quality-of-life estimates. Medical care. 2000;38(6):583-637.
18. NHS England. (2019) The NHS Long Term Plan [Available from: <https://www.longtermplan.nhs.uk/>].
19. Michie S, van Stralen MM, West R. The behaviour change wheel: a new method for characterising and designing behaviour change interventions. Implementation science : IS. 2011;6:42-.
20. Grant A, Treweek S, Dreischulte T, Foy R, Guthrie B. Process evaluations for cluster-randomised trials of complex interventions: a proposed framework for design and reporting. Trials. 2013;14:15.
21. Hawe P, Shiell A, Riley T. Complex interventions: how "out of control" can a randomised controlled trial be? BMJ (Clinical research ed). 2004;328(7455):1561-3.
22. Shephard EA, Stapley S, Neal RD, Rose P, Walter FM, Hamilton WT. Clinical features of bladder cancer in primary care. The British journal of general practice : the journal of the Royal College of General Practitioners. 2012;62(602):e598-604.
23. Shephard E, Neal R, Rose P, Walter F, Hamilton WT. Clinical features of kidney cancer in primary care: a case-control study using primary care records. The British journal of general practice : the journal of the Royal College of General Practitioners. 2013;63(609):e250-5.
24. Hamilton W. The CAPER studies: five case-control studies aimed at identifying and quantifying the risk of cancer in symptomatic primary care patients. Br J Cancer. 2009;101 Suppl 2:S80-6.
25. Stapley S, Peters TJ, Neal RD, Rose PW, Walter FM, Hamilton W. The risk of oesophago-gastric cancer in symptomatic patients in primary care: a large case-control study using electronic records. Br J Cancer. 2013;108(1):25-31.
26. Yin R. Case Study Research: Design and Methods. London: Sage Publications 2003.
27. Ritchie J, Spencer L, O'Connor W. Carrying out Qualitative Analysis. In: Ritchie J, Lewis J, editors. Qualitative Research Practice, A guide for Social Science Students and Researchers London: Sage; 2003.
28. Corbin J, Strauss A. Basics of qualitative research: Techniques and procedures for developing grounded theory. London: Sage publications; 2014.
29. O'Cathain A, Murphy E, Nicholl J. Three techniques for integrating data in mixed methods studies. BMJ. 2010;341:c4587.
30. Hobbs FDR, Bankhead C, Mukhtar T, Stevens S, Perera-Salazar R, Holt T, et al. Clinical workload in UK primary care: a retrospective analysis of 100 million consultations in England, 2007-14. Lancet 2016;387:2323-30. [http://dx.doi.org/10.1016/S0140-6736\(16\)00620-6](http://dx.doi.org/10.1016/S0140-6736(16)00620-6)
31. Baird B, Charles A, Honeyman M, Maguire D, Das P. Understanding pressures in general practice: The Kings Fund; 2016.
32. Campbell J CR, Sansom A. Retaining the experienced GP workforce in direct patient care (ReGROUP): final report. Exeter: University of Exeter Medical School; 2015.

- 1  
2  
3  
4  
5  
6  
7  
8  
9  
10  
11  
12  
13  
14  
15  
16  
17  
18  
19  
20  
21  
22  
23  
24  
25  
26  
27  
28  
29  
30  
31  
32  
33  
34  
35  
36  
37  
38  
39  
40  
41  
42  
43  
44  
45  
46  
47  
48  
49  
50  
51  
52  
53  
54  
55  
56  
57  
58  
59  
60
33. Sansom A, Terry R, Fletcher E, Salisbury C, Long L, Richards SH, et al. Why do GPs leave direct patient care and what might help to retain them? A qualitative study of GPs in South West England. *BMJ Open* 2018;8:e019849. <http://dx.doi.org/10.1136/bmjopen-2017-019849>
34. Roland M, Everington S. Tackling the crisis in general practice. *BMJ* 2016;352:i942. <http://dx.doi.org/10.1136/bmj.i942>
35. Fletcher E, Abel GA, Anderson R, Richards SH, Salisbury C, Dean SG, et al. Quitting patient care and career break intentions among general practitioners in South West England: findings of a census survey of general practitioners. *BMJ Open* 2017;7:e015853. <http://dx.doi.org/10.1136/bmjopen-2017-015853>
36. Walker B, Moss, C., Gibson, J., Sutton, M., Spooner, S., Checkland, K. Tenth National GP Worklife Survey. Manchester: Policy Research Unit in Commissioning and the Healthcare System Manchester Centre for Health Economics; 2019.
37. Fletcher E, Burns, A., Wiering, B., Lavi, D., Shephard, E., Hamilton, W., Campbell, J. L., Abel, G. Workload and workflow implications associated with the use of electronic risk assessment tools used by health professionals in general practice: a scoping review. In: University of Exeter Medical School; 2022.
38. NHS Digital. General Practice Workforce 30 September 2019. NHS Digital; 2019. URL: <https://digital.nhs.uk/data-and-information/publications/statistical/general-and-personal-medical-services/final-30-september-2019#resources> (Accessed 11/02/20).
39. Gibson J, Sutton M, Spooner S, Checkland K. Ninth National GP Worklife Survey 2017. In; 2017.
40. Moffat J, Ironmonger L. Clinical Decision Support Tool for Cancer (CDS) Project evaluation report to the Department of Health; 2014.
41. Robinson R, Poirier V, Watson S. Using Cancer Decision Support Tools to support the early diagnosis of cancer; 2017.
42. Salisbury C, Procter S, Stewart K, Bowen L, Purdy S, Ridd M, et al. The content of general practice consultations: cross-sectional study based on video recordings. *British Journal of General Practice* 2013;63:e751. <http://dx.doi.org/10.3399/bjgp13X674431>
43. Elmore N, Burt J, Abel G, Maratos FA, Montague J, Campbell J, et al. Investigating the relationship between consultation length and patient experience: a cross-sectional study in primary care. *Br J Gen Pract* 2016;66:e896-e903. <http://dx.doi.org/10.3399/bjgp16X687733>
44. Orton PK, Pereira Gray D. Factors influencing consultation length in general/family practice. *Fam Pract* 2016;33:529-34. <http://dx.doi.org/10.1093/fampra/cmw056>
45. NHS. Working life (GP). NHS; 2022. URL: <https://www.healthcareers.nhs.uk/explore-roles/doctors/roles-doctors/general-practice-gp/working-life> (Accessed 2022).



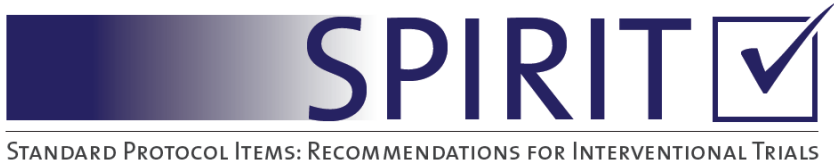

1  
2  
3  
4  
5  
6  
7  
8  
9  
10  
11  
12  
13  
14  
15  
16  
17  
18  
19  
20  
21  
22  
23  
24  
25  
26  
27  
28  
29  
30  
31  
32  
33  
34  
35  
36  
37  
38  
39  
40  
41  
42  
43  
44  
45  
46

SPIRIT 2013 Checklist: Recommended items to address in a clinical trial protocol and related documents\*

| Section/item                      | Item No | Description                                                                                                                                                                                                                                                                              | Addressed on page number |
|-----------------------------------|---------|------------------------------------------------------------------------------------------------------------------------------------------------------------------------------------------------------------------------------------------------------------------------------------------|--------------------------|
| <b>Administrative information</b> |         |                                                                                                                                                                                                                                                                                          |                          |
| Title                             | 1       | Descriptive title identifying the study design, population, interventions, and, if applicable, trial acronym                                                                                                                                                                             | Title page               |
| Trial registration                | 2a      | Trial identifier and registry name. If not yet registered, name of intended registry                                                                                                                                                                                                     | 1 & 15                   |
|                                   | 2b      | All items from the World Health Organization Trial Registration Data Set                                                                                                                                                                                                                 | n/a                      |
| Protocol version                  | 3       | Date and version identifier                                                                                                                                                                                                                                                              | 1 & 15                   |
| Funding                           | 4       | Sources and types of financial, material, and other support                                                                                                                                                                                                                              | 15                       |
| Roles and responsibilities        | 5a      | Names, affiliations, and roles of protocol contributors                                                                                                                                                                                                                                  | 15                       |
|                                   | 5b      | Name and contact information for the trial sponsor                                                                                                                                                                                                                                       | 1                        |
|                                   | 5c      | Role of study sponsor and funders, if any, in study design; collection, management, analysis, and interpretation of data; writing of the report; and the decision to submit the report for publication, including whether they will have ultimate authority over any of these activities | 12                       |
|                                   | 5d      | Composition, roles, and responsibilities of the coordinating centre, steering committee, endpoint adjudication committee, data management team, and other individuals or groups overseeing the trial, if applicable (see Item 21a for data monitoring committee)                         | 12-13                    |

1 **Introduction**

2

3 Background and rationale 6a Description of research question and justification for undertaking the trial, including summary of relevant studies (published and unpublished) examining benefits and harms for each intervention 2-3

4

5

6 6b Explanation for choice of comparators 5-7

7

8 Objectives 7 Specific objectives or hypotheses 3-4

9

10 Trial design 8 Description of trial design including type of trial (eg, parallel group, crossover, factorial, single group), allocation ratio, and framework (eg, superiority, equivalence, noninferiority, exploratory) 4

11

12

13

14 **Methods: Participants, interventions, and outcomes**

15

16 Study setting 9 Description of study settings (eg, community clinic, academic hospital) and list of countries where data will be collected. Reference to where list of study sites can be obtained 4

17

18

19 Eligibility criteria 10 Inclusion and exclusion criteria for participants. If applicable, eligibility criteria for study centres and individuals who will perform the interventions (eg, surgeons, psychotherapists) 7

20

21

22 Interventions 11a Interventions for each group with sufficient detail to allow replication, including how and when they will be administered 4-5

23

24

25 11b Criteria for discontinuing or modifying allocated interventions for a given trial participant (eg, drug dose change in response to harms, participant request, or improving/worsening disease) n/a

26

27

28 11c Strategies to improve adherence to intervention protocols, and any procedures for monitoring adherence (eg, drug tablet return, laboratory tests) 14 and Appx D

29

30

31 11d Relevant concomitant care and interventions that are permitted or prohibited during the trial 4-7

32

33

34 Outcomes 12 Primary, secondary, and other outcomes, including the specific measurement variable (eg, systolic blood pressure), analysis metric (eg, change from baseline, final value, time to event), method of aggregation (eg, median, proportion), and time point for each outcome. Explanation of the clinical relevance of chosen efficacy and harm outcomes is strongly recommended 8-9

35

36

37

38

39

40 Participant timeline 13 Time schedule of enrolment, interventions (including any run-ins and washouts), assessments, and visits for participants. A schematic diagram is highly recommended (see Figure) 6

41

42

43

44

45

46

|    |                                                                     |     |                                                                                                                                                                                                                                                                                                                                                                                                              |       |
|----|---------------------------------------------------------------------|-----|--------------------------------------------------------------------------------------------------------------------------------------------------------------------------------------------------------------------------------------------------------------------------------------------------------------------------------------------------------------------------------------------------------------|-------|
| 1  | Sample size                                                         | 14  | Estimated number of participants needed to achieve study objectives and how it was determined, including clinical and statistical assumptions supporting any sample size calculations                                                                                                                                                                                                                        | 6-7   |
| 2  |                                                                     |     |                                                                                                                                                                                                                                                                                                                                                                                                              |       |
| 3  |                                                                     |     |                                                                                                                                                                                                                                                                                                                                                                                                              |       |
| 4  | Recruitment                                                         | 15  | Strategies for achieving adequate participant enrolment to reach target sample size                                                                                                                                                                                                                                                                                                                          | 7     |
| 5  |                                                                     |     |                                                                                                                                                                                                                                                                                                                                                                                                              |       |
| 6  |                                                                     |     |                                                                                                                                                                                                                                                                                                                                                                                                              |       |
| 7  | <b>Methods: Assignment of interventions (for controlled trials)</b> |     |                                                                                                                                                                                                                                                                                                                                                                                                              |       |
| 8  | Allocation:                                                         |     |                                                                                                                                                                                                                                                                                                                                                                                                              |       |
| 9  |                                                                     |     |                                                                                                                                                                                                                                                                                                                                                                                                              |       |
| 10 | Sequence                                                            | 16a | Method of generating the allocation sequence (eg, computer-generated random numbers), and list of any factors for stratification. To reduce predictability of a random sequence, details of any planned restriction (eg, blocking) should be provided in a separate document that is unavailable to those who enrol participants or assign interventions                                                     | 7     |
| 11 | generation                                                          |     |                                                                                                                                                                                                                                                                                                                                                                                                              |       |
| 12 |                                                                     |     |                                                                                                                                                                                                                                                                                                                                                                                                              |       |
| 13 |                                                                     |     |                                                                                                                                                                                                                                                                                                                                                                                                              |       |
| 14 |                                                                     |     |                                                                                                                                                                                                                                                                                                                                                                                                              |       |
| 15 |                                                                     |     |                                                                                                                                                                                                                                                                                                                                                                                                              |       |
| 16 | Allocation                                                          | 16b | Mechanism of implementing the allocation sequence (eg, central telephone; sequentially numbered, opaque, sealed envelopes), describing any steps to conceal the sequence until interventions are assigned                                                                                                                                                                                                    | 7     |
| 17 | concealment                                                         |     |                                                                                                                                                                                                                                                                                                                                                                                                              |       |
| 18 | mechanism                                                           |     |                                                                                                                                                                                                                                                                                                                                                                                                              |       |
| 19 |                                                                     |     |                                                                                                                                                                                                                                                                                                                                                                                                              |       |
| 20 | Implementation                                                      | 16c | Who will generate the allocation sequence, who will enrol participants, and who will assign participants to interventions                                                                                                                                                                                                                                                                                    | 7     |
| 21 |                                                                     |     |                                                                                                                                                                                                                                                                                                                                                                                                              |       |
| 22 |                                                                     |     |                                                                                                                                                                                                                                                                                                                                                                                                              |       |
| 23 |                                                                     |     |                                                                                                                                                                                                                                                                                                                                                                                                              |       |
| 24 | Blinding (masking)                                                  | 17a | Who will be blinded after assignment to interventions (eg, trial participants, care providers, outcome assessors, data analysts), and how                                                                                                                                                                                                                                                                    | 7-8   |
| 25 |                                                                     |     |                                                                                                                                                                                                                                                                                                                                                                                                              |       |
| 26 |                                                                     |     |                                                                                                                                                                                                                                                                                                                                                                                                              |       |
| 27 |                                                                     | 17b | If blinded, circumstances under which unblinding is permissible, and procedure for revealing a participant's allocated intervention during the trial                                                                                                                                                                                                                                                         | n/a   |
| 28 |                                                                     |     |                                                                                                                                                                                                                                                                                                                                                                                                              |       |
| 29 |                                                                     |     |                                                                                                                                                                                                                                                                                                                                                                                                              |       |
| 30 |                                                                     |     |                                                                                                                                                                                                                                                                                                                                                                                                              |       |
| 31 | <b>Methods: Data collection, management, and analysis</b>           |     |                                                                                                                                                                                                                                                                                                                                                                                                              |       |
| 32 |                                                                     |     |                                                                                                                                                                                                                                                                                                                                                                                                              |       |
| 33 | Data collection                                                     | 18a | Plans for assessment and collection of outcome, baseline, and other trial data, including any related processes to promote data quality (eg, duplicate measurements, training of assessors) and a description of study instruments (eg, questionnaires, laboratory tests) along with their reliability and validity, if known. Reference to where data collection forms can be found, if not in the protocol | 9-12  |
| 34 | methods                                                             |     |                                                                                                                                                                                                                                                                                                                                                                                                              |       |
| 35 |                                                                     |     |                                                                                                                                                                                                                                                                                                                                                                                                              |       |
| 36 |                                                                     |     |                                                                                                                                                                                                                                                                                                                                                                                                              |       |
| 37 |                                                                     |     |                                                                                                                                                                                                                                                                                                                                                                                                              |       |
| 38 |                                                                     |     |                                                                                                                                                                                                                                                                                                                                                                                                              |       |
| 39 |                                                                     | 18b | Plans to promote participant retention and complete follow-up, including list of any outcome data to be collected for participants who discontinue or deviate from intervention protocols                                                                                                                                                                                                                    | 11-12 |
| 40 |                                                                     |     |                                                                                                                                                                                                                                                                                                                                                                                                              |       |
| 41 |                                                                     |     |                                                                                                                                                                                                                                                                                                                                                                                                              |       |
| 42 |                                                                     |     |                                                                                                                                                                                                                                                                                                                                                                                                              |       |
| 43 |                                                                     |     |                                                                                                                                                                                                                                                                                                                                                                                                              |       |
| 44 |                                                                     |     |                                                                                                                                                                                                                                                                                                                                                                                                              |       |
| 45 |                                                                     |     |                                                                                                                                                                                                                                                                                                                                                                                                              |       |
| 46 |                                                                     |     |                                                                                                                                                                                                                                                                                                                                                                                                              |       |

|    |                                 |     |                                                                                                                                                                                                                                                                                                                                       |               |
|----|---------------------------------|-----|---------------------------------------------------------------------------------------------------------------------------------------------------------------------------------------------------------------------------------------------------------------------------------------------------------------------------------------|---------------|
| 1  | Data management                 | 19  | Plans for data entry, coding, security, and storage, including any related processes to promote data quality (eg, double data entry; range checks for data values). Reference to where details of data management procedures can be found, if not in the protocol                                                                     | 11-12         |
| 2  |                                 |     |                                                                                                                                                                                                                                                                                                                                       |               |
| 3  |                                 |     |                                                                                                                                                                                                                                                                                                                                       |               |
| 4  |                                 |     |                                                                                                                                                                                                                                                                                                                                       |               |
| 5  | Statistical methods             | 20a | Statistical methods for analysing primary and secondary outcomes. Reference to where other details of the statistical analysis plan can be found, if not in the protocol                                                                                                                                                              | 9-11          |
| 6  |                                 |     |                                                                                                                                                                                                                                                                                                                                       |               |
| 7  |                                 |     |                                                                                                                                                                                                                                                                                                                                       |               |
| 8  |                                 | 20b | Methods for any additional analyses (eg, subgroup and adjusted analyses)                                                                                                                                                                                                                                                              | 11            |
| 9  |                                 |     |                                                                                                                                                                                                                                                                                                                                       |               |
| 10 |                                 | 20c | Definition of analysis population relating to protocol non-adherence (eg, as randomised analysis), and any statistical methods to handle missing data (eg, multiple imputation)                                                                                                                                                       | 11            |
| 11 |                                 |     |                                                                                                                                                                                                                                                                                                                                       |               |
| 12 |                                 |     |                                                                                                                                                                                                                                                                                                                                       |               |
| 13 |                                 |     |                                                                                                                                                                                                                                                                                                                                       |               |
| 14 | <b>Methods: Monitoring</b>      |     |                                                                                                                                                                                                                                                                                                                                       |               |
| 15 |                                 |     |                                                                                                                                                                                                                                                                                                                                       |               |
| 16 | Data monitoring                 | 21a | Composition of data monitoring committee (DMC); summary of its role and reporting structure; statement of whether it is independent from the sponsor and competing interests; and reference to where further details about its charter can be found, if not in the protocol. Alternatively, an explanation of why a DMC is not needed | 12-13         |
| 17 |                                 |     |                                                                                                                                                                                                                                                                                                                                       |               |
| 18 |                                 |     |                                                                                                                                                                                                                                                                                                                                       |               |
| 19 |                                 |     |                                                                                                                                                                                                                                                                                                                                       |               |
| 20 |                                 |     |                                                                                                                                                                                                                                                                                                                                       |               |
| 21 |                                 |     |                                                                                                                                                                                                                                                                                                                                       |               |
| 22 |                                 | 21b | Description of any interim analyses and stopping guidelines, including who will have access to these interim results and make the final decision to terminate the trial                                                                                                                                                               | n/a           |
| 23 |                                 |     |                                                                                                                                                                                                                                                                                                                                       |               |
| 24 |                                 |     |                                                                                                                                                                                                                                                                                                                                       |               |
| 25 | Harms                           | 22  | Plans for collecting, assessing, reporting, and managing solicited and spontaneously reported adverse events and other unintended effects of trial interventions or trial conduct                                                                                                                                                     | 9, Appendix D |
| 26 |                                 |     |                                                                                                                                                                                                                                                                                                                                       |               |
| 27 |                                 |     |                                                                                                                                                                                                                                                                                                                                       |               |
| 28 | Auditing                        | 23  | Frequency and procedures for auditing trial conduct, if any, and whether the process will be independent from investigators and the sponsor                                                                                                                                                                                           | n/a           |
| 29 |                                 |     |                                                                                                                                                                                                                                                                                                                                       |               |
| 30 |                                 |     |                                                                                                                                                                                                                                                                                                                                       |               |
| 31 |                                 |     |                                                                                                                                                                                                                                                                                                                                       |               |
| 32 | <b>Ethics and dissemination</b> |     |                                                                                                                                                                                                                                                                                                                                       |               |
| 33 |                                 |     |                                                                                                                                                                                                                                                                                                                                       |               |
| 34 | Research ethics approval        | 24  | Plans for seeking research ethics committee/institutional review board (REC/IRB) approval                                                                                                                                                                                                                                             | 15            |
| 35 |                                 |     |                                                                                                                                                                                                                                                                                                                                       |               |
| 36 |                                 |     |                                                                                                                                                                                                                                                                                                                                       |               |
| 37 | Protocol amendments             | 25  | Plans for communicating important protocol modifications (eg, changes to eligibility criteria, outcomes, analyses) to relevant parties (eg, investigators, REC/IRBs, trial participants, trial registries, journals, regulators)                                                                                                      | 12-13         |
| 38 |                                 |     |                                                                                                                                                                                                                                                                                                                                       |               |
| 39 |                                 |     |                                                                                                                                                                                                                                                                                                                                       |               |
| 40 |                                 |     |                                                                                                                                                                                                                                                                                                                                       |               |
| 41 |                                 |     |                                                                                                                                                                                                                                                                                                                                       |               |
| 42 |                                 |     |                                                                                                                                                                                                                                                                                                                                       |               |

|    |                               |     |                                                                                                                                                                                                                                                                                     |                                                                                                              |
|----|-------------------------------|-----|-------------------------------------------------------------------------------------------------------------------------------------------------------------------------------------------------------------------------------------------------------------------------------------|--------------------------------------------------------------------------------------------------------------|
| 1  | Consent or assent             | 26a | Who will obtain informed consent or assent from potential trial participants or authorised surrogates, and how (see Item 32)                                                                                                                                                        | 11 & Appendices B & D (only relevant for nested studies)                                                     |
| 2  |                               |     |                                                                                                                                                                                                                                                                                     |                                                                                                              |
| 3  |                               |     |                                                                                                                                                                                                                                                                                     |                                                                                                              |
| 4  |                               |     |                                                                                                                                                                                                                                                                                     |                                                                                                              |
| 5  |                               | 26b | Additional consent provisions for collection and use of participant data and biological specimens in ancillary studies, if applicable                                                                                                                                               | 11 & Appendices B & D (only relevant for nested studies)                                                     |
| 6  |                               |     |                                                                                                                                                                                                                                                                                     |                                                                                                              |
| 7  |                               |     |                                                                                                                                                                                                                                                                                     |                                                                                                              |
| 8  |                               |     |                                                                                                                                                                                                                                                                                     |                                                                                                              |
| 9  | Confidentiality               | 27  | How personal information about potential and enrolled participants will be collected, shared, and maintained in order to protect confidentiality before, during, and after the trial                                                                                                | 11-12                                                                                                        |
| 10 |                               |     |                                                                                                                                                                                                                                                                                     |                                                                                                              |
| 11 |                               |     |                                                                                                                                                                                                                                                                                     |                                                                                                              |
| 12 |                               |     |                                                                                                                                                                                                                                                                                     |                                                                                                              |
| 13 | Declaration of interests      | 28  | Financial and other competing interests for principal investigators for the overall trial and each study site                                                                                                                                                                       | 15                                                                                                           |
| 14 |                               |     |                                                                                                                                                                                                                                                                                     |                                                                                                              |
| 15 |                               |     |                                                                                                                                                                                                                                                                                     |                                                                                                              |
| 16 | Access to data                | 29  | Statement of who will have access to the final trial dataset, and disclosure of contractual agreements that limit such access for investigators                                                                                                                                     | 14                                                                                                           |
| 17 |                               |     |                                                                                                                                                                                                                                                                                     |                                                                                                              |
| 18 |                               |     |                                                                                                                                                                                                                                                                                     |                                                                                                              |
| 19 | Ancillary and post-trial care | 30  | Provisions, if any, for ancillary and post-trial care, and for compensation to those who suffer harm from trial participation                                                                                                                                                       | n/a                                                                                                          |
| 20 |                               |     |                                                                                                                                                                                                                                                                                     |                                                                                                              |
| 21 |                               |     |                                                                                                                                                                                                                                                                                     |                                                                                                              |
| 22 | Dissemination policy          | 31a | Plans for investigators and sponsor to communicate trial results to participants, healthcare professionals, the public, and other relevant groups (eg, via publication, reporting in results databases, or other data sharing arrangements), including any publication restrictions | 14                                                                                                           |
| 23 |                               |     |                                                                                                                                                                                                                                                                                     |                                                                                                              |
| 24 |                               |     |                                                                                                                                                                                                                                                                                     |                                                                                                              |
| 25 |                               |     |                                                                                                                                                                                                                                                                                     |                                                                                                              |
| 26 |                               |     |                                                                                                                                                                                                                                                                                     |                                                                                                              |
| 27 |                               | 31b | Authorship eligibility guidelines and any intended use of professional writers                                                                                                                                                                                                      | 14                                                                                                           |
| 28 |                               |     |                                                                                                                                                                                                                                                                                     |                                                                                                              |
| 29 |                               | 31c | Plans, if any, for granting public access to the full protocol, participant-level dataset, and statistical code                                                                                                                                                                     | 14                                                                                                           |
| 30 |                               |     |                                                                                                                                                                                                                                                                                     |                                                                                                              |
| 31 | <b>Appendices</b>             |     |                                                                                                                                                                                                                                                                                     |                                                                                                              |
| 32 |                               |     |                                                                                                                                                                                                                                                                                     |                                                                                                              |
| 33 | Informed consent materials    | 32  | Model consent form and other related documentation given to participants and authorised surrogates                                                                                                                                                                                  | Not applicable for main trial. Multiple documents for each nested study, available from authors upon request |
| 34 |                               |     |                                                                                                                                                                                                                                                                                     |                                                                                                              |
| 35 |                               |     |                                                                                                                                                                                                                                                                                     |                                                                                                              |
| 36 |                               |     |                                                                                                                                                                                                                                                                                     |                                                                                                              |
| 37 |                               |     |                                                                                                                                                                                                                                                                                     |                                                                                                              |
| 38 |                               |     |                                                                                                                                                                                                                                                                                     |                                                                                                              |
| 39 |                               |     |                                                                                                                                                                                                                                                                                     |                                                                                                              |
| 40 |                               |     |                                                                                                                                                                                                                                                                                     |                                                                                                              |
| 41 |                               |     |                                                                                                                                                                                                                                                                                     |                                                                                                              |
| 42 |                               |     |                                                                                                                                                                                                                                                                                     |                                                                                                              |

1 Biological 33 Plans for collection, laboratory evaluation, and storage of biological specimens for genetic or molecular n/a  
2 specimens analysis in the current trial and for future use in ancillary studies, if applicable  
3

---

4 \*It is strongly recommended that this checklist be read in conjunction with the SPIRIT 2013 Explanation & Elaboration for important clarification on the items.  
5 Amendments to the protocol should be tracked and dated. The SPIRIT checklist is copyrighted by the SPIRIT Group under the Creative Commons  
6 [“Attribution-NonCommercial-NoDerivs 3.0 Unported”](#) license.  
7  
8  
9  
10  
11  
12  
13  
14  
15  
16  
17  
18  
19  
20  
21  
22  
23  
24  
25  
26  
27  
28  
29  
30  
31  
32  
33  
34  
35  
36  
37  
38  
39  
40  
41  
42  
43  
44  
45  
46

For peer review only

# BMJ Open

## Protocol for a pragmatic cluster randomised controlled trial assessing the clinical effectiveness and cost-effectiveness of electronic risk-assessment for cancer for patients in general practice (ERICA)

|                                 |                                                                                                                                                                                                                                                                                                                                                                                                                                                                                                                                                                                                                                                                                                                                                                                                                                                                                                                                                                                                                                         |
|---------------------------------|-----------------------------------------------------------------------------------------------------------------------------------------------------------------------------------------------------------------------------------------------------------------------------------------------------------------------------------------------------------------------------------------------------------------------------------------------------------------------------------------------------------------------------------------------------------------------------------------------------------------------------------------------------------------------------------------------------------------------------------------------------------------------------------------------------------------------------------------------------------------------------------------------------------------------------------------------------------------------------------------------------------------------------------------|
| Journal:                        | <i>BMJ Open</i>                                                                                                                                                                                                                                                                                                                                                                                                                                                                                                                                                                                                                                                                                                                                                                                                                                                                                                                                                                                                                         |
| Manuscript ID                   | bmjopen-2022-065232.R1                                                                                                                                                                                                                                                                                                                                                                                                                                                                                                                                                                                                                                                                                                                                                                                                                                                                                                                                                                                                                  |
| Article Type:                   | Protocol                                                                                                                                                                                                                                                                                                                                                                                                                                                                                                                                                                                                                                                                                                                                                                                                                                                                                                                                                                                                                                |
| Date Submitted by the Author:   | 20-Jan-2023                                                                                                                                                                                                                                                                                                                                                                                                                                                                                                                                                                                                                                                                                                                                                                                                                                                                                                                                                                                                                             |
| Complete List of Authors:       | Hamilton, Willie; University of Exeter, Primary Care Diagnostics<br>Mounce, Luke; University of Exeter, Institute of Health Research<br>Abel, Gary; University of Exeter, University of Exeter Medical School (Primary Care)<br>Dean, Sarah; PenCLAHRC University of Exeter Medical School,<br>Campbell, John; University of Exeter, Primary Care<br>Warren, Fiona; University of Exeter Medical School, Institute of Health Research<br>Spencer, Anne; University of Exeter Medical School, Health Economics<br>Medina-Lara, Antonieta; University of Exeter Medical School, Health Economics Group<br>Pitt, Martin; University of Exeter, University of Exeter: Medical School<br>Shephard, Elizabeth; University of Exeter,<br>Shakespeare, Marijke; University of Exeter Medical School, Primary Care<br>Fletcher, Emily; University of Exeter Medical School, Primary Care Research Group<br>Mercer, Adrian; University of Exeter Medical School, Primary Care<br>Calitri, Raff; University of Exeter Medical School, Primary Care |
| <b>Primary Subject Heading</b>: | General practice / Family practice                                                                                                                                                                                                                                                                                                                                                                                                                                                                                                                                                                                                                                                                                                                                                                                                                                                                                                                                                                                                      |
| Secondary Subject Heading:      | Health services research                                                                                                                                                                                                                                                                                                                                                                                                                                                                                                                                                                                                                                                                                                                                                                                                                                                                                                                                                                                                                |
| Keywords:                       | HEALTH SERVICES ADMINISTRATION & MANAGEMENT, Risk management < HEALTH SERVICES ADMINISTRATION & MANAGEMENT, PRIMARY CARE, Clinical trials < THERAPEUTICS                                                                                                                                                                                                                                                                                                                                                                                                                                                                                                                                                                                                                                                                                                                                                                                                                                                                                |
|                                 |                                                                                                                                                                                                                                                                                                                                                                                                                                                                                                                                                                                                                                                                                                                                                                                                                                                                                                                                                                                                                                         |

SCHOLARONE™  
Manuscripts

1  
2  
3  
4  
5  
6  
7  
8  
9  
10  
11  
12  
13  
14  
15  
16  
17  
18  
19  
20  
21  
22  
23  
24  
25  
26  
27  
28  
29  
30  
31  
32  
33  
34  
35  
36  
37  
38  
39  
40  
41  
42  
43  
44  
45  
46  
47  
48  
49  
50  
51  
52  
53  
54  
55  
56  
57  
58  
59  
60

## Protocol for a pragmatic cluster randomised controlled trial assessing the clinical effectiveness and cost-effectiveness of electronic risk-assessment for cancer for patients in general practice (ERICA)

Willie Hamilton,<sup>1</sup> Luke Mounce,<sup>1</sup> Gary Abel,<sup>1</sup> Sarah Dean,<sup>1</sup> John Campbell,<sup>1</sup> Fiona Warren,<sup>1</sup> Anne Spencer,<sup>1</sup> Antonieta Medina-Lara,<sup>1</sup> Martin Pitt,<sup>1</sup> Elizabeth Shephard,<sup>1</sup> Marijke Shakespeare,<sup>1</sup> Emily Fletcher,<sup>1</sup> Adrian Mercer,<sup>1</sup> Raff Calitri.<sup>1</sup>

<sup>1</sup>University of Exeter, St Luke's campus, Exeter, EX1 2LU

Willie Hamilton, Professor of Primary Care Diagnostics: [w.hamilton@exeter.ac.uk](mailto:w.hamilton@exeter.ac.uk), ORCID ID 0000-0003-1611-1373 (Corresponding author)

Luke Mounce, Research Fellow: [l.t.a.mounce@exeter.ac.uk](mailto:l.t.a.mounce@exeter.ac.uk), ORCID ID 0000-0002-6089-0661

Gary Abel, Associate Professor: [g.a.abel@exeter.ac.uk](mailto:g.a.abel@exeter.ac.uk), ORCID ID 0000-0003-2231-5161

Sarah G Dean, Professor in Psychology Applied to Rehabilitation and Health: [s.dean@exeter.ac.uk](mailto:s.dean@exeter.ac.uk), ORCID ID 0000-0002-3682-5149

John Campbell, Professor of General Practice and Primary Care: [john.compbell@exeter.ac.uk](mailto:john.compbell@exeter.ac.uk), ORCID ID 0000-0002-6752-3493

Fiona Warren, Senior Lecturer in Medical Statistics: [f.c.warren@exeter.ac.uk](mailto:f.c.warren@exeter.ac.uk), ORCID ID 0000-0002-3833-0182

Anne Spencer, Associate Professor: [a.e.spencer@exeter.ac.uk](mailto:a.e.spencer@exeter.ac.uk), ORCID ID 0000-0002-8163-3103

Antonieta Medina-Lara, Associate Professor in Health Economics: [a.medina-lara@exeter.ac.uk](mailto:a.medina-lara@exeter.ac.uk), ORCID ID 0000-0001-7325-8246

Martin Pitt, Professor of Applied Healthcare Modelling and Data Science: [m.pitt@exeter.ac.uk](mailto:m.pitt@exeter.ac.uk)

Elizabeth Shephard, Research Fellow: [e.a.shephard@exeter.ac.uk](mailto:e.a.shephard@exeter.ac.uk), ORCID ID 0000-0002-3610-3680

Marijke Shakespeare, Trial coordinator: [m.shakespeare@exeter.ac.uk](mailto:m.shakespeare@exeter.ac.uk)

Emily Fletcher, Research Fellow: [e.fletcher@exeter.ac.uk](mailto:e.fletcher@exeter.ac.uk), ORCID ID 0000-0003-1319-3051

Adrian Mercer, PPIE Representative, [zante256@gmail.com](mailto:zante256@gmail.com)

Raff Calitri, Research Fellow and Trial Manager, [r.calitri@exeter.ac.uk](mailto:r.calitri@exeter.ac.uk), ORCID ID 0000-0003-0889-4670



## Abstract

**Introduction.** The UK has worse cancer outcomes than most comparable countries, with a large contribution attributed to diagnostic delay. Electronic risk assessment tools (eRATs) have been developed to identify primary care patients with a  $\geq 2\%$  risk of cancer using features recorded in the electronic record.

**Methods and analysis.** This is a pragmatic cluster randomised controlled trial in English primary care. Individual general practices will be randomised in a 1:1 ratio to intervention (provision of eRATs for six common cancer sites) or to usual care. The primary outcome is cancer stage at diagnosis, dichotomised to stage 1 or 2 (early) or stage 3 or 4 (advanced) for these six cancers, assessed from national cancer registry data. Secondary outcomes include stage at diagnosis for a further six cancers without eRATs, use of urgent referral cancer pathways, total practice cancer diagnoses, routes to cancer diagnosis, and 30-day and 1-year cancer survival. Economic and process evaluations will be performed along with service delivery modelling. The primary analysis explores the proportion of cancer patients with early stage at diagnosis. The sample size calculation used an odds ratio of 0.8 for a cancer being diagnosed at advanced stage in the intervention arm compared with the control arm, equating to an absolute reduction of 4.8% as an incidence-weighted figure across the six cancers. This requires 530 practices overall, with the intervention active from April 2022 for 2 years.

**Ethics and dissemination.** The trial has approval from London City & East Research Ethics committee, reference number 19/LO/0615; protocol version 5.0, 9<sup>th</sup> May 2022. It is sponsored by the University of Exeter. Dissemination will be by journal publication, conferences, use of appropriate social media and direct sharing with cancer policymakers.

**Registration.** The trial is registered with ISRCTN: (trial no: ISRCTN22560297).

*Word Count: 5665*

Key words: Early cancer diagnosis, randomised controlled trial, clinical risk-assessment tools, General Practice

---

## Article summary

### Strengths and limitations of this study

- Improvements in primary care are seen as a key for improving early cancer diagnosis in the UK, and this trial is targeting that part of the diagnostic pathway.
  - This is a large, definitive trial, powered to identify a clinically important difference in cancer stage at diagnosis.
  - The trial is designed to minimise impact on participating practices with outcome data being obtained from routinely collected National Health Service data.
  - One limitation is that the UK's national imperative to improve cancer diagnosis after the COVID pandemic may mean use of other interventions (or eRATs themselves) are encouraged by policymakers, reducing the validity and reliability of the trial.
- 

### Introduction

An estimated 10,000 UK cancer deaths each year would not occur if the UK matched the outcomes of other European countries.(1) Much of the difference is attributed to diagnostic delay.(2) The NHS Long Term plan, published in January 2019, specifically targets an increase in the percentage of cancer patients whose cancer is stage 1 or 2 (thus potentially curable) at diagnosis to rise from the current 54% to 75% by 2028.(3) Diagnosis of cancer may occur by several routes, but the main ones are population screening, and diagnosis after symptoms have occurred. Although screening for cancer is effective for colorectal, breast, lung and cervical cancers,(4-6) less than 10% of the total new UK cancers are identified by this route. Most of the remainder are diagnosed after presenting with symptoms, usually to primary care. Of patients with cancer, just under 20% present with an emergency complication of their cancer; however, many of these patients have previously reported symptoms attributable to their cancer to primary care, but this presentation did not lead to a diagnosis of cancer.(7) Within general practice, many studies have aimed at identifying the symptoms of possible cancer and quantifying their predictive value.(8) One main output has been Risk Assessment Tools (generally abbreviated to RATs); these give precise estimates of the chance of an underlying cancer as a percentage figure. RATs provide precise estimates for single symptoms (e.g. the risk of cancer of the lung for a person aged 40 years or more with haemoptysis is 2.4%), as pairs of symptoms (haemoptysis accompanied by loss of weight is 9.2%) or as repeated symptoms (a re-attendance with haemoptysis is 17%).(9) RATs are published for the 18 most common adult cancers, accounting for nearly 90% of the total cancer burden. These publications have been highly influential: in particular, they strongly contributed to the National Institute of Healthcare Excellence (NICE) guideline, Suspected cancer: recognition and referral [NG12], which guides symptomatic diagnosis of cancer in the UK.(10)

1  
2  
3  
4  
5  
6  
7  
8  
9  
10  
11  
12  
13  
14  
15  
16  
17  
18  
19  
20  
21  
22  
23  
24  
25  
26  
27  
28  
29  
30  
31  
32  
33  
34  
35  
36  
37  
38  
39  
40  
41  
42  
43  
44  
45  
46  
47  
48  
49  
50  
51  
52  
53  
54  
55  
56  
57  
58  
59  
60

The initial RATs, of paper, mouse mat, calendar, or web-based forms, increased cancer diagnostic activity,(11) though impacts on hard outcomes such as stage at diagnosis or cancer survival were unknown. Electronic RATs (eRATs) for seven major cancers (lung, colorectal, pancreas, oesophago-gastric, bladder, kidney and ovary) have been developed for the two largest UK primary care electronic healthcare record systems, SystmOne and EMIS, used in around 80% of English practices. The software performs daily calculations of individual cancer risk in patients aged 40 and over, using coded symptoms and laboratory results in the patient's record over the past year, and prompts the general practitioner (GP) when the risk of one or more of these cancers is equal to or above 2%. Some form of electronic clinical decision support for cancer diagnosis has been downloaded by practices and used by at least one practice member in approximately 12% of English practices.(12). Two systematic reviews recently concluded that more research evidence was needed for impact on time to diagnosis and treatment, stage at diagnosis, and health outcomes, as well as research to understand how tools are used in GP consultations.(13) A feasibility trial of the oesophago-gastric eRAT published after these systematic reviews reported installation and regulatory problems that severely restricted usage,(14) and a vignette study of the colorectal RAT suggested it changed the GP's inclination to refer in 26% of usages.(15)

One crucial aspect of eRAT research relates to cost-effectiveness: annual NHS spending on cancer diagnosis is approximately £1bn.(16) Observational data showed increased use of the urgent cancer referral system to improve survival,(17) but there is insufficient data to inform a cost-effectiveness analysis of the subject.(13)

## Objectives

The overarching aim of the trial is to assess the clinical and cost-effectiveness of using eRATs for six cancer sites – colorectal, lung, bladder, kidney, oesophago-gastric and ovarian cancers - compared with usual care for patients in general practice. Our hypothesis is that provision of eRATs will expedite the diagnosis of symptomatic cancer resulting in better cancer outcomes.

The primary objective is to compare the effects of using eRATs (vs usual care) on the percentage of patients with a newly diagnosed cancer at one of the six sites whose cancer is staged as being stage 1 or 2 (versus stage 3 or 4).

A secondary objective is to investigate differences in the stage at diagnosis of a further six cancers without eRATs (combined): breast, melanoma, prostate, Non-Hodgkin lymphoma, larynx and uterus. This is to investigate the possibility of an effect whereby eRATs are associated with increased

1 diagnostic activity beyond the eRAT cancers. We will also investigate differences in: the number of  
2 patients diagnosed with the six eRAT cancers combined, and the total number of cancers (excluding  
3 non-melanoma skin cancer) diagnosed, use of the 2-week wait referral system (the main pathway for  
4 urgent investigation of possible cancer in England) or equivalent for the six eRAT cancers combined,  
5 and across all cancers; the routes to diagnosis for each of the six eRAT cancers,(18) and for the six  
6 comparator non-eRAT cancers; the proportion of patients on a 2-week wait pathway receiving a  
7 diagnosis of cancer; whether a patient on a 2-week wait pathway has a diagnosis of cancer established  
8 (or refuted) within 28 days; 30-day and 1-year survival for those with cancer; the rate of cancer  
9 investigations, namely colonoscopies, sigmoidoscopies, upper gastro-intestinal endoscopies, chest x-  
10 rays, abdominal ultrasounds, and abdominal CT scans. We will also conduct parallel cost-effectiveness  
11 analyses, service delivery modelling and a process evaluation.

## 21 **Methods and analysis**

### 23 ***Design and setting***

24 The study is a pragmatic cluster randomised-controlled trial in England, in primary care medical  
25 practices using one of the two (SystemOne or EMIS) electronic record keeping systems. The clusters  
26 are practices, a term which includes single practices, and small groups of practices agglomerated  
27 administratively to single entities. These will be randomised 1:1 to receive either the intervention  
28 (access to the suite of eRATs) or usual care. It is unrealistic to offer eRATs to individual GPs, as there  
29 would be considerable contamination within any practice. Nevertheless, for a practice to be eligible  
30 to take part, we ask at least 50% of GPs in that practice to agree to use the eRATs. Although the  
31 intervention is at the practice level, some process and resource use measures and all main trial primary  
32 and secondary outcomes relate to individual patients.

### 41 ***Intervention***

#### 43 **The eRATs**

44 The eRATs have been developed by a specialist IT team, Informatica systems Ltd, in partnership with  
45 the cancer charity, Macmillan. The risk estimates in the eRATs are from the original research papers  
46 for each cancer site. (9, 19-24) Practices will access the software via a new cloud-based system called  
47 Skyline, specifically designed to facilitate efficient integration into GP clinical systems. CA marking of  
48 the Skyline version of eRATs was obtained in September 2021.

49 The eRATs have multiple functions. The first is the '*prompt*'. This collates relevant coded symptoms  
50 and blood tests in the patient's medical record from the previous 12 months, which are then assessed  
51 for the possibility of cancer, generating a risk score equivalent to the positive predictive value of the  
52 cancer features for each cancer. A prompt (pop-up), displaying the risk score(s), appears on screen  
53  
54  
55  
56  
57  
58  
59  
60

1 when a registered user opens a patient's medical records and indicates that patient has a risk of 2%  
2 or higher for at least one of the studied cancers. A second function is the '*symptom checker*', allowing  
3 the clinician to add additional patient's symptoms to the eRAT checklist on screen; this process  
4 automatically recalculates the risk of any of the six cancers. On reviewing the risk score from the  
5 prompt and/or symptom checker, the clinician then decides the best course of management, which  
6 may be: (i) clinical review in primary care; (ii) ordering of test/investigations; or (iii) referral into  
7 secondary care. Embedded within all eRATs are links to authoritative guidance regarding the early  
8 diagnosis of cancer, NICE NG12,(25), Macmillan's abbreviated NICE guidance,(26) and Cancer  
9 Research UK guidance. (27) These sources of information are added to assist management of the  
10 patient, but the decision whether – or not – to investigate is for the clinician and patient. Some EMIS  
11 practices also have access to the QCancer risk tool, (28) albeit embedded in a dormant state within  
12 the practice IT and record system, and requiring manual activation prior to operation. All practices will  
13 be asked not to use it during the trial.  
14  
15  
16  
17  
18  
19  
20  
21  
22  
23  
24

### 25 **Justification of cancer sites**

26 RATs are available for 18 adult cancers, each varying in their incidence, ease of diagnosis, amenability  
27 to treatment and proportion presenting as an emergency.  
28  
29  
30

31 We elected to study cancer sites a) which were in the top 15 cancers by incidence; b) for which curative  
32 treatment is reasonably possible in symptomatic patients;(29) and c) with a significant percentage of  
33 patients presenting as an emergency.(30). Using these criteria, six cancer sites were selected,  
34 amounting to approximately half of all incident cancers. The selected six were: lung, colorectal,  
35 oesophago-gastric, ovary, kidney and bladder. The remaining nine cancers were considered as  
36 comparators to examine for any practice level effect of increased cancer diagnostic activity. Three of  
37 these nine cancers, brain, pancreas and leukaemia, were removed for clinical and practical reasons:  
38 no eRAT is available for brain or leukaemia; in both brain and pancreas, symptomatic diagnosis is  
39 considered to have a very small likelihood of improving survival,(29) and in leukaemia, a full blood  
40 count (easily available in primary care) will usually establish the diagnosis, making an eRAT unlikely to  
41 expedite the diagnosis.(31)  
42  
43  
44  
45  
46  
47  
48  
49  
50  
51

### 52 **Training practices in using eRATs**

53 Training in the use of the eRATs uses short, pre-recorded videos available online co-ordinated by a  
54 practice 'research champion'. These show GPs how to use the prompt and symptom checker  
55 functions.  
56  
57  
58  
59  
60

### **Duration of intervention**

Practice recruitment started in August 2019 and is expected to finish at the end of March 2022, including the installation of the eRATs software. The trial was paused for 6 months in March 2020 due to Covid-19. The formal start of the intervention window will be 01/04/2022 (although some practices may have delayed installation) and will close for all intervention practices on 31/3/2024.

### **Usual care**

Patients presenting to the control practices will experience the GP's usual diagnostic approach. GPs in control practices will have no specific on-screen prompt, though they may have access to hard-copy (e.g. paper or mouse mat) versions of the RATs, or to other cancer tools such as those supporting structured follow-up of symptomatic patients not selected for initial investigation. For EMIS practices with QCancer dormant in the system, control practices are expected to leave it dormant. We will document control practice use of RATs, other decision support tools, and access to and use of eRATs via interim and exit questionnaires completed within the first 12 months of a practice commencing the intervention and at the end of the trial. In line with intervention practices, trial time will formally begin for control practices on 01/04/2022 and end on 31/03/2024.

### **Data collection window**

Outcome data for all practices will be obtained for the 2-year period from 01/06/2022 to 29/05/2024. This data collection window is lagged behind the trial time window (01/04/2022 to 31/03/2024) in order to: a) provide some time for practices to become accustomed to how the intervention functions prior to data collection, and b) to have a 2-month window following the end of the intervention window in order to allow cancers to be diagnosed in patients seen towards the end of that window.

### **Sample size**

There are around 130,000 new diagnoses of the six included cancers in the UK annually.<sup>(32)</sup> As each of our six cancer sites has different proportions diagnosed at an early stage, the sample size calculation is based on a relative improvement in staging, using an odds ratio of 0.8 for a cancer being diagnosed at Stage 3/4 in the intervention arm compared with the control arm. This difference is quite large and equates to an absolute reduction of 4.8% in the intervention arm as an incidence-weighted figure across the six cancers. A much smaller improvement would still be clinically valuable but would necessitate an impossibly large trial.

For the inflation factor we have used an intra-cluster correlation coefficient based on our previous work, of 0.05.<sup>(33)</sup> An average cluster size of 23 patients with a diagnosed cancer with recorded stage during 2-year follow-up is expected, with a coefficient of variation for cluster size of 0.7, giving a design

1 effect of 2.66. For an individually randomised trial with 90% power and an alpha threshold of 0.05, the  
2 sample size would be 2,049 patients per arm. Adding in the design effect, this becomes 5,497 patients,  
3 requiring 239 practices per arm, and 478 practices in total. Due to changes in practice structure (such  
4 as practice mergers, closures or divisions), we anticipate the loss of up to 10% of recruited practices  
5 over the course of the trial; to account for this we will recruit a target of 530 practices overall,  
6 expecting 12,190 patients to be diagnosed with cancer in total.  
7  
8  
9

### 10 11 12 13 **Practice recruitment**

14 A total of 530 primary care practices across England will be recruited, supported by the NIHR Clinical  
15 Research Network (CRN) and strategic media releases to raise awareness of the trial. Practices that  
16 are proposing a split or a merger are not eligible for the trial, as the practices before or after the  
17 change may have been allocated to different arms in the trial. A method for identifying and managing  
18 unanticipated splits or mergers during the active phase of the trial is shown in Appendix A.  
19  
20  
21  
22

23 Patients are not being recruited into this trial - patient consent is not being sought for the use of the  
24 eRATs during the consultation. This is because ERATs are essentially an extension and enhancement  
25 of existing diagnostic tools already available to the GP to support their clinical decision making. Other  
26 randomised controlled trials of interventions in primary care have taken this approach,<sup>(34)</sup> including  
27 the feasibility trial of the oesophago-gastric eRAT.<sup>(14, 35, 36)</sup> To promote patient awareness of the  
28 practice's participation in the ERICA trial, including requesting practices to add it to their websites and  
29 any social media feed. A selection of patients will be recruited to the nested process evaluation and  
30 health economics studies (see below and Appendices B and D).  
31  
32  
33  
34  
35  
36  
37  
38

### 39 **Randomisation**

40 Practices will be randomised using a 1:1 ratio into one of two trial arms: usual diagnostic care (control)  
41 and usual diagnostic practice plus access to the suite of eRATs, as the intervention. Randomisation  
42 will be computer-generated and web-based, conducted by an independent member of staff at the  
43 Exeter Clinical Trials Unit (ExeCTU), overseen by the CTU statistician (not the trial statistician). To  
44 promote balance between the trial arms in practices' use of the 2-week wait system, and therefore  
45 propensity to refer to secondary care, we will minimise randomisation by age-sex standardised 2-week  
46 wait referral ratio (the best available proxy) in national tertiles. We will use simple randomisation to  
47 allocate the first 50 practices (~10% of the total target), and then apply minimisation by 2-week wait  
48 referral ratio tertile, taking into account the previous allocations to inform the minimisation algorithm.  
49 All allocations using the minimisation algorithm will retain a stochastic element, aimed at promoting  
50 allocation concealment.  
51  
52  
53  
54  
55  
56  
57  
58  
59  
60

1 The data analysis will be carried out by the trial statistician and health-economist, blinded to  
2 treatment allocation and all primary outcome data are objective assessments of clinical outcome.  
3 Staging (the primary outcome) will be performed by pathologists unaware of trial participation or  
4 allocation. However, given the nature of the intervention, it is not possible to blind GPs or the GP  
5 practice to treatment allocation.  
6  
7  
8  
9  
10

## 11 Outcome measures

### 12 Primary outcome

13 Outcome measures will be captured at patient-level, using data routinely collected by the National  
14 Cancer Registration and Analysis Service (NCRAS). The primary outcome is whether a patient is  
15 diagnosed at stage 1 or 2 (early) or stage 3 or 4 (advanced). This division of staging is commonly used  
16 and is a targeted metric in the 2019 NHS Long Term Plan - for stage 1 and 2 cancers (for all staged  
17 cancers other than non-melanoma skin cancer) at diagnosis to comprise 75% of the total by 2028. The  
18 current UK overall incidence-weighted percentage of early stage at diagnosis was 55% in 2018, though  
19 for the six eRAT cancers, it is 35%.(37)  
20  
21  
22  
23  
24  
25  
26  
27  
28  
29

### 30 Secondary outcomes

31 A range of secondary outcomes will be examined:

- 32 1. The binary stage at diagnosis of a further six cancers without eRATs will be identified from  
33 NCRAS, and compared between intervention and control practices. This is to investigate the  
34 possibility of a 'spill-over' effect whereby eRATs are associated with increased diagnostic  
35 activity beyond the eRAT cancers.  
36
- 37 2. The practice's number of patients diagnosed with the six eRAT cancers combined, and the  
38 total number of cancer cases, from NCRAS.  
39
- 40 3. The number of patients investigated or referred under the 2-week wait system for the six eRAT  
41 cancers combined, and in total, from Cancer Waiting Times data.  
42
- 43 4. Route to diagnosis from the Routes to Diagnosis Dataset,(18) which uses Hospital Episode  
44 Statistics data. This will be categorised into four possible routes: emergency attendance, 2-  
45 week wait referral, GP referral, and "other". We will collect this information for each of the  
46 six eRAT cancers, and for the six comparator non-eRAT cancers.  
47
- 48 5. 2-week wait performance measures, from Cancer Waiting Times data, for the six eRAT cancers  
49 combined, and for all cancer referrals:  
50  
51  
52  
53  
54  
55  
56  
57  
58  
59  
60



1  
2  
3  
4  
5  
6  
7  
8  
9  
10  
11  
12  
13  
14  
15  
16  
17  
18  
19  
20  
21  
22  
23  
24  
25  
26  
27  
28  
29  
30  
31  
32  
33  
34  
35  
36  
37  
38  
39  
40  
41  
42  
43  
44  
45  
46  
47  
48  
49  
50  
51  
52  
53  
54  
55  
56  
57  
58  
59  
60

5.1 Whether a patient on a 2-week wait pathway received a diagnosis of cancer. When aggregated, for example at the practice-level, and expressed as the proportion of patients who received a cancer diagnosis, this is known as the conversion rate.

5.2 The duration between 2-week wait referral and diagnosis of cancer in days

5.3 Whether patients referred on a 2-week wait referral and who received a cancer diagnosis were diagnosed within 28 days, the Faster Diagnosis Standard (introduced in 2022).

5.4 Detection rate – the proportion of a practice’s cancers which are identified via the 2-week wait pathway.

6. Survival measures (from date of diagnosis): 30-day; 1-year (identified from NCRAS). 5-year survival will also be reported, but the main trial will report on 30 day and 1-year, with 5-year data being a subsidiary report. These outcomes will use all-cause mortality data from the Office for National Statistics.

7. Adverse events (using data from the Diagnostic Imaging Dataset): these are expected to be few, and largely related to complications from hospital investigation such as colonoscopy. There is no mechanism for adverse events to be collected using routine data. We will, however, estimate any change in the expected number of adverse events from imaging investigations (colonoscopies, sigmoidoscopies, upper gastro-intestinal endoscopies, chest x-rays, abdominal ultrasounds, and abdominal CT scans) through investigating any change in the rate of these investigations in intervention practices relative to control practices (see data analysis section). Potential adverse psychological consequences of being labelled with ‘possible cancer’ will be further explored in the process evaluation.

## Data collection

All primary and secondary outcome measures are available from NCRAS, DID and publicly available practice level data, including Cancer Waiting Times data. We will be using depersonalised (pseudo-anonymised) data. The Public Health England Office for Data Release (ODR) guidelines indicated that no legal gateway (e.g., section 251 approval) will be necessary to obtain these data.

## Data analysis

All analyses will follow CONSORT guidelines for cluster-randomised and pragmatic trials. The primary analysis, exploring the proportion of cancer patients with early stage at diagnosis, will use mixed-

1 effects logistic regression with a random intercept for practice to accommodate the hierarchical  
2 nature of the data (i.e. random allocation by practice, with participants nested within practice). This  
3 regression will include trial-arm at practice-level, and will adjust for patient-level covariates known to  
4 be associated with stage (age, sex, quintile of the income domain from the Index of Multiple  
5 Deprivation (IMD), and cancer site),(38) and the practice-level minimisation variable (national tertile  
6 of age-sex standardised two-week wait referral ratio). We will further adjust the model at the practice-  
7 level for list size, clinical IT system used, and Care Quality Commission (CQC) overall rating, should  
8 these variables be associated with stage in preliminary analyses (even if not unbalanced with respect  
9 to trial allocation). Trial arm and covariates will all be entered as fixed effects. The degree of change  
10 in the percentage of patients diagnosed at a late stage in intervention practices will be investigated  
11 by exploring the marginal distributions of trial arm on the probabilities predicted by these models.  
12  
13  
14  
15  
16  
17  
18  
19

20 For the secondary outcome of the stage at diagnosis of six cancers without eRATs, we will repeat the  
21 above model including data on the six non-eRAT cancers as well as the six eRAT cancers. This model  
22 will use all the variables described above, plus an indicator variable for whether the cancer site has an  
23 eRAT and an interaction term between this variable and trial arm. From this model, we will obtain  
24 odds ratios (with 95% CIs) for: (i) the “spill over” effect of having the intervention on cancer sites not  
25 included in the intervention, and (ii) for the relative effect of the intervention on stage for included  
26 cancer sites compared with those not included in the intervention.  
27  
28  
29  
30  
31  
32  
33

34 Mixed-effects logistic regression models with a random intercept for practice will also be fitted for the  
35 other secondary binary outcomes; route to diagnosis, conversion rate, and timeliness. These models  
36 will include trial arm as a practice-level effect, and will adjust at the patient-level for age, sex, and  
37 quintile of the Index of Multiple Deprivation (IMD) income domain, and at the practice-level for the  
38 minimisation variable (national tertile of age-sex standardised two-week wait referral ratio). These  
39 analyses will also adjust at the patient-level for cancer site (routes to diagnosis analyses) or for referral  
40 type (2-week wait analyses) as appropriate. The models will be further adjusted as in the main  
41 outcome variable analysis.  
42  
43  
44  
45  
46  
47  
48

49 Time-to-event secondary outcomes (length of waiting time, survival) will be analysed using mixed-  
50 effects parametric survival models with a random intercept for practice, and all other variables added  
51 as fixed effects. These models will include trial-arm as a practice-level effect, and will adjust for the  
52 same patient-level factors as described above (waiting times adjusted for referral pathway rather than  
53 cancer site as above), and the practice-level minimisation variable (national tertile of age-sex  
54 standardised 2-week wait referral ratio). The models will also use the same adjustment as the primary  
55  
56  
57  
58  
59  
60

1 outcome measure. An appropriate distribution to model the baseline hazard will be utilised, as  
2 determined by a comparison of the Akaike Information Criteria under different distributions.(39)  
3  
4

5 For rate outcomes (number of 2-week wait referrals, cancers, and imaging investigations), we will  
6 analyse the rates per 100,000 registered patients per year by age-sex strata using mixed-effects  
7 Poisson regression models including a random intercept for practice. These models will include trial-  
8 arm as a predictor and will adjust for the age and sex of the strata, and at the practice-level for the  
9 minimisation variable (2-week wait referral ratio) and deprivation (quintile of IMD overall score). The  
10 models will be further adjusted at the practice-level for list size, clinical IT system used, CQC overall  
11 rating, and for the age and sex case-mix of practices should these covariates be found to be associated  
12 with the outcome (even if not unbalanced with respect to allocation). Case-mix will be incorporated  
13 by including variables for counts of practice populations in different age-sex strata (5-year age groups  
14 by sex, excluding one age group-sex stratum that can be determined once all others are known).  
15  
16  
17  
18  
19  
20  
21  
22

23 All the above analyses will combine data for the six eRAT cancers for each model. For outcomes  
24 related to two-week wait referrals, data will be combined for all referral pathways relevant to the six  
25 eRAT cancers. To investigate whether the eRATs produce a “spill-over” effect, whereby diagnostic  
26 activity is increased for other cancers, we will repeat all analyses using data for the six non-eRAT  
27 cancers combined for each model. Investigation of a spill-over effect for 2-week wait referral  
28 outcomes will use data for all referral pathways combined.  
29  
30  
31  
32  
33

34 Additional sensitivity analyses will be conducted for the primary outcome in order to explore  
35 moderation arising from practice-level characteristics, using interaction terms. Although the trial has  
36 not been powered to detect low to moderate subgroup differences, large interaction effects that differ  
37 with respect to the direction of effect across subgroups are of interest. The potential impact of missing  
38 staging data on the primary outcome will also be explored through use of multiple imputation  
39 methods making use of auxiliary variables such as survival time, morphology and grade to improve the  
40 Missing At Random (MAR) assumption in line with previous work).(40)  
41  
42  
43  
44  
45  
46  
47  
48

#### 49 **Data management**

50 Cancer registry data (NCRAS) will be managed and prepared by the registry themselves and  
51 securely, electronically transferred to the study team. There will be no patient identifiable data within  
52 these datasets. Data from NCRAS will be stored on the Secure Data Resource Hub at the University of  
53 Exeter (which meets requirements for secure storage of sensitive data) and linked to existing practice  
54 data held within ExeCTU’s REDCap database. The data will be stored and retained in accordance with  
55 registry policies.  
56  
57  
58  
59  
60

1 The nested studies rely on identifying patients from in-practice usage reports. These reports contain  
2 depersonalised (pseudo-anonymised) data. The practice will send a copy to the trial team with the  
3 original practice ID number removed. The local at practice reports will be securely and electronically  
4 transferred to a secure Exeter CTU computer.  
5  
6  
7  
8

9  
10 In the recruitment of patients (and NHS staff) for interviews, questionnaires, or permission for access  
11 to medical notes, participant details will be passed securely between NHS services and the research  
12 team. All participants agreeing to interview, to complete a questionnaire, and/or medical notes  
13 review, and all GPs agreeing to interview will be allocated a unique study ID, and the information  
14 linking their ID to their personal details will be kept securely at the University of Exeter. All other  
15 participant-related paper records will be anonymised and stored separately from the personal  
16 information. The electronic database for the trial will be stored on the secure servers of the University  
17 of Exeter with password-controlled access provided for the research team by ExeCTU. Single data  
18 entry with extensive in-built validity checks will be used to reduce the risk of transcription errors.  
19  
20  
21  
22  
23  
24  
25

26  
27 Audio recordings will be digitised, encrypted and stored on the University's secure server. Audio  
28 recordings will be retained until after anonymised transcripts have been finalised and analysed. At this  
29 stage they will be securely and permanently deleted. Access to personal data will be restricted to the  
30 research team. Names and participant details will not be passed to any third parties and no named  
31 individuals will be included in the outputs. All participants (patients, NHS staff) will be asked for their  
32 consent for the study team to retain interview transcripts for the purposes of future research by those  
33 involved directly in the study team or to be used for educational purposes.  
34  
35  
36  
37  
38  
39

40 Informatica Systems Ltd has developed a separate agreement ('Data processing deed') for  
41 intervention practices which will be used between the GP practices and Informatica Systems Ltd. The  
42 deed was necessary because the development of Skyline has impacted on the processing  
43 arrangements for the eRATs software that is used. The ERICA research study will still use  
44 the Organisation Information Document which outlines the research team's data processing  
45 requirements, to be signed between the practice and Sponsor.  
46  
47  
48  
49  
50

51  
52 All study data will be kept for 10 years (unless data registry policy requires otherwise) under secure  
53 conditions on University of Exeter secure servers. Data will also be subject to standard secure storage  
54 and usage policies.  
55  
56  
57  
58  
59  
60

## **Trial monitoring and management**

### ***Trial Sponsor and Funders***

The University of Exeter is the trial sponsor. The trial funders are providing finance to run the trial. None of the funders or sponsor will be involved in the design or day-to-day conduct of the trial, analysis of data, or interpretation of findings.

### ***Trial Steering Committee (with Data Monitoring Committee responsibilities)***

The responsibilities of the Trial Steering Committee (TSC) will be to review the main study protocol and any amendments, monitor and supervise the trial towards its interim and overall objectives, review relevant information from other sources, and to help resolve problems brought by the Trial Management group (TMG). The TSC will therefore provide overall independent supervision for ERICA on behalf of the funders and the Sponsor. Meetings will be held at regular intervals determined by need and not less than twice a year. Routine business will be conducted by telephone, videoconference, and email. The TSC will also operate as a Data Monitoring Committee with responsibility to monitor the overall conduct of the trial. There will be a time lag between practices 'entering the trial' and data availability from cancer registries. The time lag will be such that data will only be available once practices have completed data collection. Therefore, interim analyses to assess whether the trial was effective, and to support a decision whether to stop the trial early, would be unnecessary as data collection (and practice participation) would have already ceased.

### ***Trial Management Group***

A TMG has been established and includes those responsible for the day-to-day management of the trial and those supporting the delivery of the trial and associated stakeholders, including representatives of the Local Clinical Research Networks (LCRN) and Macmillan. The group will monitor all aspects of the conduct and progress of the trial, ensure that the protocol is adhered to and take appropriate action to safeguard participants and the quality of the trial itself. The group will meet regularly (monthly in the first instance, until recruitment has completed) in person and/or by phone or over the internet (via MS Teams).

### ***Core Study Team***

The core study team (Chief investigator, Trial Manager (TM)) will meet weekly during the study. Day-to-day running of the trial will be the responsibility of the TM. The TM will have access to the ExeCTU suite of standard operating procedures (SOPs) and will ensure that the trial is run in compliance with all relevant SOPs (e.g., assessment, processes and reporting, data management, study staff health and safety).

## ***Nested Studies***

### **Health Economics**

We will estimate the cost and cost-effectiveness of the eRATs versus usual diagnostic practice using the primary perspective of the NHS and Personal Social Services (i.e. third-party payer). We will estimate the cost-effectiveness of the intervention based upon the primary outcome and secondary survival outcomes (30-day and 1-year; 5-year survival will be a subsidiary report) for the six cancer sites with eRATs and report the results using the latest guidelines.<sup>(41)</sup> For three cancer sites we will use decision analytic models to combine data from the within-trial analysis of ERICA intervention on costs and benefits, with longer estimates derived from the evidence synthesis of the costs and benefits of stage of diagnosis and disease progression to estimate the cost per Quality Adjusted Life Year (QALY) over the longer term.<sup>(42)</sup> For fuller details see Appendix B.

### **Service Delivery Modelling**

This will investigate the key factors central to the (re) organisation of NHS diagnostic services for cancer referrals. We will use a range of methods, both quantitative and qualitative, to analyse service delivery alternatives. Specifically, we will aim to use modelling approaches to explore the likely implications of different scenarios across dimensions of performance, outcomes and costs. Fuller details are in Appendix C.

### **Process Evaluation**

The process evaluation work aims to identify and investigate the contextual factors that impact upon the effectiveness of the eRATs with a particular focus on intervention fidelity and GP engagement. The impact of the eRATs on the patients' experience of their GP consultation and their experiences of subsequent care will also be explored. Fuller details are in Appendix D.

### **GP Workload**

This nested study aims to explore, in terms of consultation time, the impact of GPs using eRATs on GP workload and patient 'flow' through consulting sessions. It will also explore workload in the week following the index consultation in which an eRAT was activated. Fuller details are in Appendix E.

### **Patient and Public Involvement and Engagement**

Our Patient and Public Involvement and Engagement (PPIE) group, including cancer survivors, have been consulted widely during the development of this study. The PPIE group have reviewed and

1 commented on the protocol and supported the development of all patient-facing materials including  
2 information sheets and study lay summaries. One experienced PPIE representative sits on the TMG  
3 and another is on the TSC. A total of seven people have joined our PPIE group for this study and will  
4 contribute by reviewing study materials and documentation, commenting upon and proof reading  
5 reports and contributing to dissemination activities. This group will be supported in their work by the  
6 South West Peninsula Applied Research Collaboration (PenARC) PPIE team, for example by attending  
7 workshops on critical appraisal skills. All PPIE representatives will be recompensed for their time given  
8 to the study.  
9  
10  
11  
12  
13

### 14 **Ethics and Dissemination**

15 A trial publication policy will be developed which outlines the plan for dissemination and will be in  
16 accordance with the International Committee of Medical Journal Editors. The results of the trial will  
17 be reported first to study collaborators and to the funder. The main report will be drafted by the TMG  
18 and circulated to all collaborators and the TSC for comment.  
19  
20  
21  
22  
23

24 Access to the final trial datasets will be made publicly available unless contractual agreements  
25 between data providers limit such access.  
26  
27  
28  
29

### 30 **Ethical review**

31 The trial has received favourable Ethical review from London City & East Research Ethics committee,  
32 reference number 19/LO/0615, with eight amendments between then and 2022, relating to three  
33 main areas: the delays caused by the COVID-19 pandemic, with its recruitment moratorium; an  
34 alteration in the mechanism by which the eRATs software were delivered; and the inclusion of a  
35 nested study focussing on the impact of eRATs on GP workload. Current protocol version – V 6.0, 8<sup>th</sup>  
36 August, 2022.  
37  
38  
39  
40  
41  
42  
43

44 **Author contributions:** WH conceived of the trial. Substantial contributions to the design of the  
45 methods and research processes were made by WH, JC, LM, SD, GA, MP, AS, AML, FW, EF, ES, MS,  
46 AM and RC. The protocol was written by RC, LM, SD, GA, AS, EF, and MP under the overall editorial  
47 control of WH. All authors critically reviewed the protocol and provided approval of the final version.  
48  
49  
50  
51

52 **Funding statement:** This research is funded by a philanthropic donation by The Dennis and Mireille  
53 Gillings Foundation, Cancer Research UK (C8640/A23385), plus support from Macmillan in provision  
54 of staff time, and the University of Exeter. The trial is registered with ISRCTN: (trial no:  
55 ISRCTN22560297) and on the CRUK trial registry (CRUK database no: 16163).  
56  
57  
58  
59  
60

1 **Acknowledgements:** We would like to thank the NIHR Clinical Research Network for their support  
2 with recruitment, Macmillan for their contributions to the early eRAT work and ongoing support with  
3 practice recruitment and pilot testing. SD's time is partially supported by the National Institute of  
4 Health Research Applied Research Collaboration (ARC) South-West Peninsula.  
5

6 **Disclaimer:** The views expressed are those of the authors and not necessarily those of the NHS, the  
7 NIHR or Department of Health.  
8  
9

10  
11  
12  
13 **Competing interests statement:** WH has intellectual property rights to the original RATs, though has  
14 never sought to commercialize these. All other authors: no competing interests to declare.  
15  
16  
17  
18  
19  
20  
21  
22  
23  
24  
25  
26  
27  
28  
29  
30  
31  
32  
33  
34  
35  
36  
37  
38  
39  
40  
41  
42  
43  
44  
45  
46  
47  
48  
49  
50  
51  
52  
53  
54  
55  
56  
57  
58  
59  
60

For peer review only



## References

1. Richards MA. The size of the prize for earlier diagnosis of cancer in England. *Br J Cancer*. 2009;101.
2. Richards M, Thorlby R, Fisher R, Turton C. *Unfinished business: An assessment of the national approach to improving cancer services in England 1995–2015*. London; 2018.
3. NHS England. (2019) *The NHS Long Term Plan* [Available from: <https://www.longtermplan.nhs.uk/>].
4. de Koning HJ, van der Aalst CM, de Jong PA, Scholten ET, Nackaerts K, Heuvelmans MA, et al. Reduced Lung-Cancer Mortality with Volume CT Screening in a Randomized Trial. *New England Journal of Medicine*. 2020;382(6):503-13.
5. Richards M. *THE INDEPENDENT REVIEW OF ADULT SCREENING PROGRAMMES*. NHS England; 2019. Contract No.: 01089.
6. Landy R, Pesola F, Castanon A, Sasieni P. Impact of cervical screening on cervical cancer mortality: estimation using stage-specific results from a nested case-control study. *Br J Cancer*. 2016;115(9):1140-6.
7. Abel GA, Mendonca SC, McPhail S, Zhou Y, Elliss-Brookes L, Lyratzopoulos G. Emergency diagnosis of cancer and previous general practice consultations: insights from linked patient survey data. *British Journal of General Practice*. 2017.
8. Hamilton W, Walter FM, Rubin G, Neal RD. Improving early diagnosis of symptomatic cancer. *Nature Reviews Clinical Oncology*. 2016;13:740.
9. Hamilton W, Peters TJ, Round A, Sharp D. What are the clinical features of lung cancer before the diagnosis is made? A population based case-control study. *Thorax*. 2005;60(12):1059-65.
10. NICE. *Suspected cancer: recognition and referral [NG12] 2015* [Available from: <https://www.nice.org.uk/guidance/ng12>].
11. Hamilton W, Green T, Martins T, Elliott K, Rubin G, Macleod U. Evaluation of risk assessment tools for suspected cancer in general practice: a cohort study. *British Journal of General Practice*. 2013;63(606):e30-e6.
12. Price S, Spencer A, Medina-Lara A, Hamilton W. Availability and use of cancer decision-support tools: a cross-sectional survey of UK primary care. *British Journal of General Practice*. 2019;69(684):e437.
13. Medina-Lara A, Grigore B, Lewis R, Peters J, Price S, Landa P, et al. Cancer diagnostic tools to aid decision-making in primary care: mixed-methods systematic reviews and cost-effectiveness analysis. *Health technology assessment (Winchester, England)*. 2020;24:66.
14. Rubin G, Walter FM, Emery J, Hamilton W, Hoare Z, Howse J, et al. Electronic clinical decision support tool for assessing stomach symptoms in primary care (ECASS): a feasibility study. *BMJ Open*. 2021;11(3):e041795.
15. Kostopoulou O, Arora K, Pálfi B. Using cancer risk algorithms to improve risk estimates and referral decisions. *Communications Medicine*. 2022;2(1):2.
16. Hamilton W. Diagnosing symptomatic cancer in the NHS. *BMJ : British Medical Journal*. 2015;351:h5311.
17. Møller H, Gildea C, Meechan D, Rubin G, Round T, Vedsted P. Use of the English urgent referral pathway for suspected cancer and mortality in patients with cancer: cohort study. *BMJ*. 2015;351.
18. Elliss-Brookes L, McPhail S, Ives A, Greenslade M, Shelton J, Hiom S. Routes to diagnosis for cancer - determining the patient journey using multiple routine data sets. *Br J Cancer*. 2012;107.
19. Hamilton W. The CAPER studies: five case-control studies aimed at identifying and quantifying the risk of cancer in symptomatic primary care patients. *Br J Cancer*. 2009;101 Suppl 2:S80-6.
20. Hamilton W, Peters TJ, Bankhead C, Sharp D. Risk of ovarian cancer in women with symptoms in primary care: population based case-control study. *BMJ*. 2009;339:b2998.

21. Hamilton W, Round A, Sharp D, Peters TJ. Clinical features of colorectal cancer before diagnosis: a population-based case-control study. *Br J Cancer*. 2005;93(4):399-405.
22. Shephard E, Neal R, Rose P, Walter F, Hamilton WT. Clinical features of kidney cancer in primary care: a case-control study using primary care records. *The British journal of general practice : the journal of the Royal College of General Practitioners*. 2013;63(609):e250-5.
23. Shephard EA, Stapley S, Neal RD, Rose P, Walter FM, Hamilton WT. Clinical features of bladder cancer in primary care. *The British journal of general practice : the journal of the Royal College of General Practitioners*. 2012;62(602):e598-604.
24. Stapley S, Peters TJ, Neal RD, Rose PW, Walter FM, Hamilton W. The risk of oesophago-gastric cancer in symptomatic patients in primary care: a large case-control study using electronic records. *Br J Cancer*. 2013;108(1):25-31.
25. NICE. Suspected cancer: recognition and referral [NG12]2015. Available from: <http://www.nice.org.uk/guidance/NG12>.
26. Macmillan. (2015) Rapid referral guidelines [available at: [https://www.macmillan.org.uk/\\_images/rapid-referral-toolkit-desktop\\_tcm9-291864.pdf](https://www.macmillan.org.uk/_images/rapid-referral-toolkit-desktop_tcm9-291864.pdf)].
27. Cancer Research UK. (2017) Cancer Stats 2017 [Available from: <http://www.cancerresearchuk.org/health-professional/cancer-statistics>].
28. Collins GS, Altman DG. Identifying patients with undetected gastro-oesophageal cancer in primary care: External validation of Qcancer(R) (Gastro-Oesophageal). *European journal of cancer (Oxford, England : 1990)*. 2013;49(5):1040-8.
29. Hamilton W, Stapley S, Campbell C, Lyratzopoulos G, Rubin G, Neal R. For which cancers might patients benefit most from expedited symptomatic diagnosis? Construction of a ranking order by a modified Delphi technique. *BMC Cancer*. 2015;15:820.
30. McPhail S, Johnson S, Greenberg D, Peake M, Rous B. Stage at diagnosis and early mortality from cancer in England. *Br J Cancer*. 2015;112(s1):S108-S15.
31. Shephard EA, Neal RD, Rose PW, Walter FM, Hamilton W. Symptoms of adult chronic and acute leukaemia before diagnosis: large primary care case-control studies using electronic records. *British Journal of General Practice*. 2016;66(644):e182-e8.
32. UK CR. Statistics by Cancer Type 2022 [Available from: <https://www.cancerresearchuk.org/health-professional/cancer-statistics/statistics-by-cancer-type>].
33. Barclay ME, Lyratzopoulos G, Greenberg DC, Abel GA. Missing data and chance variation in public reporting of cancer stage at diagnosis: Cross-sectional analysis of population-based data in England. *Cancer Epidemiology*. 2018;52:28-42.
34. Campbell JL, Fletcher E, Britten N, Green C, Holt TA, Lattimer V, et al. Telephone triage for management of same-day consultation requests in general practice (the ESTEEM trial): a cluster-randomised controlled trial and cost-consequence analysis. *The Lancet*. 2014;384(9957):1859-68.
35. Downs M, Turner S, Bryans M, Wilcock J, Keady J, Levin E, et al. Effectiveness of educational interventions in improving detection and management of dementia in primary care: cluster randomised controlled study. *BMJ*. 2006;332(7543):692.
36. Flottorp S, Oxman AD, Håvelsrud K, Treweek S, Herrin J. Cluster randomised controlled trial of tailored interventions to improve the management of urinary tract infections in women and sore throat. *Bmj*. 2002;325(7360):367.
37. National Disease Registration Service:. Case-mix adjusted percentage of cancers diagnosed at stages 1 and 2 in England, by Clinical Commissioning Group2020 25 Jan 2022. Available from: <https://www.gov.uk/government/statistics/case-mix-adjusted-percentage-cancers-diagnosed-at-stages-1-and-2-by-ccg-in-england/national-disease-registration-service-case-mix-adjusted-percentage-of-cancers-diagnosed-at-stages-1-and-2-in-england-by-clinical-commissioning-group>.
38. Lyratzopoulos G, Abel GA, Brown CH, Rous BA, Vernon SA, Roland M, et al. Socio-demographic inequalities in stage of cancer diagnosis: evidence from patients with female breast, lung, colon, rectal, prostate, renal, bladder, melanoma, ovarian and endometrial cancer. *Annals of Oncology*. 2012;24(3):843-50.
39. Bozdogan H. Model selection and Akaike's Information Criterion (AIC): The general theory and its analytical extensions. *Psychometrika*. 1987;52(3):345-70.

- 1  
2  
3  
4  
5  
6  
7  
8  
9  
10  
11  
12  
13  
14  
15  
16  
17  
18  
19  
20  
21  
22  
23  
24  
25  
26  
27  
28  
29  
30  
31  
32  
33  
34  
35  
36  
37  
38  
39  
40  
41  
42  
43  
44  
45  
46  
47  
48  
49  
50  
51  
52  
53  
54  
55  
56  
57  
58  
59  
60
40. Lyratzopoulos G, Abel GA, Brown CH, Rous BA, Vernon SA, Roland M, et al. Socio-demographic inequalities in stage of cancer diagnosis: evidence from patients with female breast, lung, colon, rectal, prostate, renal, bladder, melanoma, ovarian and endometrial cancer. *Ann Oncol*. 2013;24(3):843-50.
41. Husereau D, Drummond M, Augustovski F, de Bekker-Grob E, Briggs AH, Carswell C, et al. Consolidated Health Economic Evaluation Reporting Standards 2022 (CHEERS 2022) statement: updated reporting guidance for health economic evaluations. *BMJ*. 2022;376:e067975.
42. Weinstein MC, O'Brien B, Hornberger J, Jackson J, Johannesson M, McCabe C, et al. Principles of Good Practice for Decision Analytic Modeling in Health-Care Evaluation: Report of the ISPOR Task Force on Good Research Practices—Modeling Studies. *Value in Health*. 2003;6(1):9-17.

For peer review only

1  
2  
3  
4  
5  
6  
7  
8  
9  
10 **A pragmatic cluster randomised controlled trial assessing the clinical effectiveness and cost-**  
11 **effectiveness of electronic risk-assessment for cancer for patients in general practice (ERICA):**  
12

13 **Appendices**  
14  
15  
16  
17  
18  
19  
20  
21  
22  
23  
24  
25  
26  
27  
28  
29  
30  
31  
32  
33  
34  
35  
36  
37  
38  
39  
40  
41  
42  
43  
44  
45  
46  
47  
48  
49  
50  
51  
52  
53  
54  
55  
56  
57  
58  
59  
60

For peer review only

### **Appendix A. Managing practice splits and mergers in analyses**

Although we will exclude practices that report imminent restructuring during recruitment, there may be unforeseen mergers or splits of practices. Where mergers and splits are concerned, this could mean, for example, that some of our practices who were in the control arm may merge with an intervention practice. Similarly, a non-trial practice may become part of a trial practice (intervention or control). Changes in practice size have implications on the denominator – the number of patients that each practice is likely to be contributing to our sample – and is a particular issue for three of our secondary outcome measures based on rates (cancer diagnosis rate, two-week wait referral rate, and adverse event rate). Importantly, however, this issue is not a problem for our primary outcome of staging.

We define a split and mergers as follows: Split – Where a population of patients registered to a single practice with a single practice code become registered with two or more individual practices with different practice codes. The practice codes of the new practices may be new codes (i.e. did not exist prior to the split) or one may inherit the original practice code (although this is not a requirement). The change in registration of patients must occur to a substantial number of patients and not at their request. Merger – Where a population of patients registered to one or more practices with different practice codes become registered at a single individual practice with a single practice code. The practice code of the new practice may be a new code (i.e., did not exist prior to the split) or it may inherit one of the original practice codes. A federation is not a “merger” in these terms.

Excluding practices who restructure during the trial may unnecessarily reduce our power. Therefore, we will try and accommodate changes in status. The Table outlines our approach. The assumption is that the change takes place at time T. Any practice which splits goes from X to Y and Z, and mergers are Z plus Y becoming X. Intervention practices are I, and comparison practices C.

Practice size fluctuations will be monitored in real time. Practice size data are freely and publicly available from NHS Digital and are updated monthly. Each month during the data collection, the trial statistician will download the practice size data and inspect size for all the practices in the trial (the statistician will remain blinded to outcome allocation). If the practice size differs by more than 10% the statistician will alert the trial manager, who will contact the research champion in the relevant practice to explore the reasons for this practice size change. Reasons (e.g., mergers, splits) will be recorded.

**Table: managing changes in practice size – mergers and splits**

| Split or merger                                                                                                                                                                                                                                                      | X pre change | Y pre change | Z pre change | X post change | Y post                                                                                                 | Z post |
|----------------------------------------------------------------------------------------------------------------------------------------------------------------------------------------------------------------------------------------------------------------------|--------------|--------------|--------------|---------------|--------------------------------------------------------------------------------------------------------|--------|
| <b>Split</b>                                                                                                                                                                                                                                                         | I            |              |              |               | I                                                                                                      | I      |
|                                                                                                                                                                                                                                                                      | C            |              |              |               | C                                                                                                      | C      |
| We will allow the daughter practices to withdraw from the trial if they desire, which would mean we lose Y or Z (or both). If daughter practices decide to withdraw, we will include data up to time T plus 2 months to allow for average diagnostic time to cancer. |              |              |              |               |                                                                                                        |        |
| <b>Merger</b>                                                                                                                                                                                                                                                        |              | I            | I            | I             |                                                                                                        |        |
|                                                                                                                                                                                                                                                                      |              | I            | C            | I             | There is likely to be wash over under these conditions, so the merged practice will be considered as I |        |
|                                                                                                                                                                                                                                                                      |              | I            | Non-trial    | I             |                                                                                                        |        |
|                                                                                                                                                                                                                                                                      |              | C            | Non-trial    | C             |                                                                                                        |        |
|                                                                                                                                                                                                                                                                      |              | C            | C            | C             |                                                                                                        |        |

We will manage changes in practice size at the data analysis stage of the trial. Where changes in list size of more than 10% within a month are seen, data for that practice will not be included in the analysis of rate outcomes from one month prior to the change. There are two exceptions to this; 1) splits where all the daughter practices remain in the trial and we continue to treat them as a single practice for rate analyses, 2) mergers where merged practices are in the same arm of the trial, and we will analyse them as a single practice from the start for rate analyses.

## Appendix B

### Health Economics

**Intervention costings.** The resources used in developing the training materials and videos (preparation and IT support) will be collected from the trial manager; nationally applicable unit costs will be applied. Estimates of the extent to which these videos are watched by practice staff will be based on information available from the website platform hosting the videos. Information on the resources use to install the eRATs onto the EMIS and SystemOne practice IT systems will be estimated in consultation with practice champions. These estimates will additionally aim to estimate: 1) the cost of installation in the trial and 2) the anticipated cost of future installation should eRATs be implemented nationally.

1 **Health related quality of life and resource use.** The Health Economics analysis will draw on the  
2  
3 estimated number of imaging investigations (colonoscopies, sigmoidoscopies, upper gastro-intestinal  
4  
5 endoscopies, chest x-rays, abdominal ultrasounds, and abdominal CT scans) using data from the  
6  
7 Diagnostic Imaging Dataset available in the main trial as well as estimates of GP workload from the  
8  
9 process evaluation. Practices will be offered remuneration of nearly £200 for the additional work.

10  
11 To investigate whether the eRATs intervention was associated with a change in health-related quality  
12  
13 of life using the EQ5D-5L and to provide more detailed information on primary care services and tests  
14  
15 used, we will sample patients in the intervention arm who had a consultation where an eRAT alert  
16  
17 occurred, and patients in the control arm who had a consultation where an eRAT alert would have  
18  
19 occurred. We will strategically target practices in both trial arms who have either high, medium, or  
20  
21 low two-week wait referral rates, matching the minimisation criteria in the main trial. It is anticipated  
22  
23 that 15-20 patients per practice over a 2-week period will have a consultation with an eRAT alert. All  
24  
25 patients who have an eRAT alert will be invited to complete a baseline questionnaire and a 3 month  
26  
27 follow-up Health Economics questionnaire, as will equivalent patients in the control arm. We  
28  
29 anticipate that 40% of patients will accept, and of these there will be 20% who do not respond. With  
30  
31 a conservative estimate of a cluster size of five patients responding to the questionnaire, plus using an  
32  
33 minimum clinically important difference of 0.1 for the EQ5D-5L (2) and a standard deviation of 0.23(3),  
34  
35 with an inter-cluster correlation coefficient of 0.03 (4), and an estimated coefficient of variation of  
36  
37 cluster size of 0.7, the sample size required to detect a between group difference with 90% power and  
38  
39 alpha of 0.05 was 28 clusters (140 participants) per arm. Participants who agree to take part will  
40  
41 receive the questionnaire as a hard copy, through the post, or electronically via email, depending on  
42  
43 the participant's preference. Nationally applicable unit costs will be used for all community health and  
44  
45 social care contacts (5) and secondary care services, tests and investigations will be costed using the  
46  
47 National Schedule of Reference Costs 2016-2017. (6)

#### 48 **Decision Analytic Model**

49 The modelling aims to predict the expected impact of a change in stage of diagnosis, and any resulting  
50  
51 change in the distribution of cancer stage at diagnosis (intervention vs. control) over time, building on  
52  
53 the published literature in this area.(7-10) The decision analytic models will not need to separately  
54  
55 model the diagnostic phase, and we will take the trial's primary outcomes, stage at diagnosis (Stage  
56  
57 1-4 separately and not collated into Stage 1-2 and Stage 3-4), to model the longer term effects on  
58  
59 survival, QALYs and secondary care costs.  
60

1 Scenario analysis will be used to examine the impact on the results of multiple parameters changing  
2 simultaneously (based on *a priori* judgement about the combination of parameters to include).(11)  
3 Probabilistic sensitivity analysis will be used to explore the proportion of results that are considered  
4 cost-effective in relation to a given cost-effectiveness threshold and these results will be illustrated  
5 graphically using a cost-effectiveness acceptability curve.(12)  
6  
7  
8  
9

10  
11 The study will follow the CHEERs guidelines for reporting cost-effectiveness studies and models,(13)  
12 and will discount both costs and outcomes at 3.5% as recommended by the National Institute of  
13 Health and Care Excellence.(14) Sensitivity analyses will examine alternative assumptions about the  
14 missing data mechanisms.(15)  
15  
16  
17  
18

### 19 **Service Evaluation**

20 We will draw upon published systematic reviews of Quality of Life measures, that are based on public  
21 preferences and measured in patients (as required by NICE guidelines (16) and that have been used  
22 for economic evaluation modelling studies.(17)  
23  
24  
25  
26  
27

## 28 **Appendix C**

### 29 **Service Delivery Modelling**

#### 30 **Background and rationale**

31 Cancer diagnosis has become one of the principal areas of focus and concern for the NHS in  
32 England.(18) For some time, NHS performance in both early diagnosis, delays in referral, and  
33 associated survival rates has been poor relative to our national aspirations and when compared with  
34 other first world countries. This has worsened during the COVID pandemic. In this context, many of  
35 the issues of concern are centred on key aspects of service delivery. How the NHS organises its services  
36 is often pivotal in determining the cost, feasibility, and effectiveness. For instance, factors such as  
37 workforce availability, prioritisation, service location, scale, and resources are fundamental to the  
38 performance of the NHS in delivering effective cancer services.  
39  
40  
41  
42  
43  
44  
45  
46  
47  
48

49 This component of the ERICA programme will investigate the key factors central to the organisation  
50 of NHS diagnostic services for cancer referrals. We will use a range of methods, both quantitative and  
51 qualitative, to analyse service delivery alternatives. Specifically, we will aim to build an economic  
52 model to assess the likely implications of different scenarios. Implementation of the eRAT diagnostic  
53 tool at primary care level is likely to impact directly on the follow-on pathway for cancer diagnosis (for  
54 example in terms of the volume and case mix of referred patients for diagnosis). Our model will  
55  
56  
57  
58  
59  
60



1 therefore provide an assessment of the likely effect of this impact in terms of costs and performance,  
2 and highlight any changes in organisation that might be implied by the introduction of the eRAT tool.  
3  
4  
5

6 This research will run in parallel with the substantive work conducted for the controlled trial of eRAT  
7 implementation within ERICA. It will also liaise closely with the detailed and standard analysis of cost-  
8 effectiveness for disease progression (which is inherently abstracted from the service delivery aspects  
9 of care) in order to provide an added dimension to the cost-effectiveness outputs from the ERICA  
10 study as a whole.  
11  
12  
13  
14

### 15 *Objectives*

16 To build and populate a model of the cancer diagnostic pathway for England, in order to provide an  
17 assessment of the costs and effectiveness of different scenarios for service delivery. In particular, we  
18 will investigate the potential aspects relative to implementation of eRATs based on the study data  
19 collected from the ERICA trial. In addition, qualitative research with NHS staff in secondary care will  
20 be used to assess key areas central to successful implementation and sustainability.  
21  
22  
23  
24  
25

### 26 *Methods*

27 A wide range of methods will be essential to fulfil the objectives of the work outlined here. Early work  
28 will include a literature search and survey of current systems for diagnostics in cancer. We will  
29 therefore conduct a systematic review of the related literature in the field and carry out a survey of  
30 current service delivery organisation across a range of settings. This work will aim to identify the key  
31 factors bearing on the organisation of services such a regional variation, metropolitan versus rural  
32 context, and population case mix differences.  
33  
34  
35  
36  
37  
38  
39

40 Phase two work will aim to build a model in order to capture the key elements of service delivery for  
41 diagnostic services for cancer. This will explore a range of modelling approaches and test which is most  
42 suited to specific needs. For example, discrete event simulation, Systems Dynamics, geographic  
43 analysis, and Markov modelling will all be tested in terms of their relevance and appropriateness to  
44 specific requirements. In this context it is highly likely that different modelling tools will be relevant to  
45 the diverse needs of the study, so no single approach will be dominant.  
46  
47  
48  
49  
50

51 Phase three will focus on the service delivery implications for the introduction of the eRAT diagnostic  
52 tool in primary care looking particularly at the potential knock-on effects in other areas of service.  
53  
54  
55

56 In addition to our modelling work, we will use qualitative methods, such as problem structuring  
57 methods, soft systems mapping, to provide an assessment of some key elements of implementation.  
58  
59  
60

## Data

A wide range of data will be used to complete this component of the work. We will aim to integrate sources from across routinely collected datasets such as those listed below to construct our models: NHS activity data, Waiting time data, Reference cost data, Diagnostic Imaging Data (DIDs), Hospital Episode Statistics (HES), Workforce reference data, GP and hospital referral data, QOF data, Population data (e.g. ONS). In addition, we will aim to incorporate the primary data derived from the main ERICA study in order to model and assess the pathway impact from the use of eRATs. We will also use the outputs from the standard economic analysis as an input for the cost effectiveness of the service delivery modelling. Output from the qualitative research will also provide important data for informing the outputs of this work, for example in feeding into the recommendations and conclusions of the study.

## Appendix D

### Process Evaluation

#### *Scope of process evaluation*

The process evaluation work aims to identify and investigate the contextual factors that impact upon the effectiveness of the eRATs with a particular focus on intervention fidelity and GP engagement. The impact of the eRATs on the patients' experience of their GP consultation and their experiences of subsequent care will also be explored. It is underpinned by the COM-B framework for understanding behaviour change (19). This framework will outline the interactive nature of how the GP's capability (IT skill for using the eRATs), opportunity (eRAT prompts), and motivation (to do the training and use all the eRAT features) might influence their behaviour – i.e. ongoing use of the eRATs, symptom checker, coding of symptoms and changes to referral letters. We will use a mixed-methods approach to explore how the intervention was delivered (including fidelity and dose - if the eRATs were being used as intended and their degree of use across intervention practices and over time) and GP engagement with and acceptability of using the eRATs (GP's experiences of the eRATs).(20) For delivery, we will be particularly interested in fidelity of function. (21) GPs will be given clear training videos on how to use the eRATs and we will explore the extent to which GPs engaged with training as well as how they subsequently engaged with the software, and the GP's experiences of how it impacted on the GP-patient relationship in order to evaluate how they responded to the intervention.

#### *Methods*

*Intervention fidelity and GP engagement (intervention arm only):* Prior to the start of the intervention GPs require a minimum level of training in how to use the eRATs. Although the software is designed to be intuitive, a clinical system specific walkthrough for the two main functions of the eRATs (prompt and symptom checker) and FAQs will be available via separate videos. The research champion will be

1 given access to the videos and can disseminate the video content to all GPs in the practice (by showing  
2 the videos during a practice meeting, providing a demonstration themselves, or passing on the  
3 weblink). Once practices have started the data collection phase, we will invite up to 10 research  
4 champions to interview to discuss in depth their experiences of the set-up and training procedures  
5 and to explore whether their GPs have the capability, opportunity and motivation to use the eRATs.  
6 We will purposively sample research champions based on whether they are from a practice with a  
7 high, middle or low two-week wait referral rate, which software system their practice uses, their  
8 gender, and their level of experience in practice (10+ years vs. less than 10 years in practice).  
9

10 Detailed eRAT usage can be captured for all IT systems. Usage will be captured in two ways – i) via a  
11 central log and ii) via local ‘at practice’ reports. For i), usage logs will be routinely and automatically  
12 sent from the practice to the Informatica ‘digital warehouse’ and will contain anonymised, practice-  
13 level data for each eRAT including reports of: how many times the prompt was shown, how many  
14 times the symptom checker was used, the number of times the symptoms were changed during use  
15 of the symptom checker, the length of time the symptom checker was open for, and whether clinical  
16 guidance was accessed from the eRAT. These centrally reported logs will be available on a monthly  
17 basis throughout the course of the trial and will be securely sent from Informatica to the research  
18 team who will add the data to the trial database.  
19

20 For ii), usage will be examined via reports run locally at each practice. These reports include individual  
21 patient level data outlining which eRAT was triggered, the patient’s risk score on the eRAT, when the  
22 symptom checker was opened and closed, patient’s age and sex, and a list of possible eRAT symptoms  
23 and whether they were changed. These reports contain depersonalised (pseudo-anonymised) data.  
24 As it is possible to potentially identify the patient via the practice ID number we will ask practices to  
25 make a copy of the report, add in a new patient study ID variable (e.g., p1, p2, p3, etc) and save it to  
26 the practice computer. We will then ask them to send a copy to the trial team with the original practice  
27 ID number removed. They will also send the file with a predetermined practice ID number. These  
28 measures should ensure the data is anonymised. The local at practice reports will be securely and  
29 electronically transferred to a secure Exeter CTU computer.  
30

31 Intervention fidelity (Intervention and control). We will ask all research champions in the intervention  
32 practice to complete a short questionnaire (online via a secure, University approved provider)  
33 detailing their experience of installing software, using the eRATs, and whether alternative risk tools  
34 have also been used. We will ask research champions at control practices their experiences of being  
35 in the trial and whether they have started using any cancer risk tools. The questionnaires will be  
36

1 completed at two time points – i) within 12 months of the start of the intervention; ii) at the end of  
2 the data collection period.  
3  
4  
5

6 For identifying GPs to interview, we will use maximum variation purposive sampling (sampling on  
7 practice two-week wait referral rate (high vs. medium vs. low); software system used, gender, length  
8 of time in practice (10+years vs. < 10 years), and working status (part time vs full time)) and expect to  
9 interview up to 18 GPs from intervention practices to ask them about their experience of the eRATs  
10 including the training provided, any impacts on the consultation and their clinical decision making, as  
11 well as any changes in symptom coding behaviour. We will invite GPs to interview after the  
12 intervention has been running for at least 3 months. Written information will be provided about the  
13 interview study and written consent will be taken prior to the interview and will be verbally confirmed  
14 before the interview commences. Interviews will be audio-recorded and carried out by telephone,  
15 face-to-face (only if it is safe to do so), or over the internet (e.g., Zoom or MS Teams) depending on  
16 the GP's preference, by members of the research team using a pre-defined topic guide that focuses  
17 on their training and capability to use eRATs, their opportunity to use the eRATs over the study period  
18 and their motivation to continue using the system. If a face-to-face interview is chosen (and safe to  
19 perform), interviews will take place in a private room at the practice. The researcher will comply with  
20 the lone worker policy, ensuring that have a 'buddy' within the research team monitoring their  
21 activities and whereabouts. The interviews may raise sensitive issues such as workload and GP  
22 overburden or burnout: the interview study information sheet will provide appropriate sources for  
23 accessing confidential support. GPs will be reminded that they have the right to not answer any  
24 question, stop the interview or withdraw from the interview study; if there is insufficient time to fully  
25 discuss issues GPs will be offered a follow-up time to complete the interview.  
26  
27  
28  
29  
30  
31  
32  
33  
34  
35  
36  
37  
38  
39  
40  
41

42 *GP coding behaviour:* It is possible that the eRATs will impact GP coding behaviour - GP coding  
43 behaviour for cancer specific symptoms may increase; this would cause a minor increase in triggering  
44 of eRATs. We will explore the impact of eRATs on coding behaviour in the interviews (see above) and,  
45 resources permitting, will also examine the impact on coding rates using the following approach. We  
46 will purposively sample 12 intervention practices and 12 control practices in the South/South West of  
47 England based on two-week wait referral rate (i.e., 4 low, 4 moderate, 4 high referring practices) and  
48 which software system is being used. In the first instance we will invite practices who are participating  
49 in the nested study to support this work. If insufficient numbers agree, we will approach other  
50 practices who are not participating in the nested studies. We will explore the rate of coding of the  
51 most frequent symptom for each eRAT cancer in the study that underpins that particular cancer (e.g.  
52 cough, abdominal pain, haematuria)(22-25) for a month in the first three months of entry into ERICA,  
53 and for the same calendar month a year and two years later (as some symptoms have seasonal  
54  
55  
56  
57  
58  
59  
60

1 variation). This will be performed retrospectively, by the search code being given to the research  
2 champion, who will arrange for the search to be conducted in the practice. The results of the search  
3 will be emailed to the research team.  
4  
5  
6  
7

8 *Patient experience of care:* We will adopt a phased, targeted recruitment strategy with an aim to  
9 purposively sample up to (based on two-week rate referral rate (low vs. medium vs. high); gender, age  
10 (40-60 vs. 60+)) 32 patients from the intervention arm. We will approach five practices at a time (and  
11 expect to recruit around 20 practices to reach the target number of participants), to ensure that we  
12 can interview participants in a timely manner.  
13  
14  
15  
16

17  
18 The in-practice eRAT reports are the mechanism by which we will be able to identify individuals to  
19 invite to participate in the activities associated with the process evaluation. The local (at practice)  
20 reporting mechanism will allow the research team to identify individuals for whom the eRATs were  
21 used and thus who are potentially eligible to participate in a semi-structured interview. Purposive  
22 sampling will take place – practices will hold the master eRAT report containing both the patients  
23 practice ID number and the new patient study ID. The research team will let the practice know the  
24 patient study IDs for those whom an invitation letter will be sent. Practices will be offered  
25 remuneration of nearly £200 for the additional work.  
26  
27  
28  
29  
30  
31

32  
33 Via the GP practice, the research team will send out a letter and information booklet to the identified  
34 patients to invite participation in an interview to discuss their experience of care. We will adopt a  
35 longitudinal case study design (26) – patients' care pathways will differ, some will receive referrals  
36 into secondary care for investigations and tests, while some will be on a 'watch and wait' plan,  
37 revisiting their GP at an agreed interval. Some patients will have tests for cancer and the test will  
38 indicate that there is no cancer (false positives) whereas some patients will be diagnosed with cancer.  
39 So that we can fully capture all patient groups at different stages of their care, individuals will be  
40 invited for repeat interviews at regular intervals (i.e., at least one month apart and no more than 3  
41 interviews within 12 months).  
42  
43  
44  
45  
46  
47  
48  
49

50 We aim to perform the first interview within one month of the consultation in which an eRAT was  
51 triggered. Written information about the interview study will have been provided and written  
52 informed consent will be taken prior to all interviews, and will be verbally confirmed before the  
53 interview commences. Interviews will be audio-recorded and carried out by members of the research  
54 team using pre-defined topic guides. The initial interview will be conducted face-to-face at the  
55 participant's home or via video conferencing software such as MS Teams at a time convenient for the  
56 participant, with any subsequent interview conducted either face-to-face, over the phone, or via video  
57  
58  
59  
60

1 conference software, depending upon the participant's preference. We will monitor the progression  
2 of the Covid-19 pandemic and fully adhere to government advice around social distancing and travel.  
3 We will not put the research team or participants at risk and will primarily conduct interviews online.  
4 If it is safe to conduct face-to-face interviews, the researcher will comply with the lone worker policy,  
5 ensuring that have a 'buddy' within the research team monitoring their activities, whereabouts and  
6 expected completion time. The interviews may raise anxiety or concerns related to uncertainty about  
7 diagnosis during the referral and investigation period or the watch and wait period; or psychological  
8 distress associated with a cancer diagnosis or a false-positive result. The interview study information  
9 sheet will provide appropriate sources for accessing confidential support and patients will be  
10 reminded that they have the right to not answer any question, stop the interview or withdraw from  
11 the interview study.  
12  
13  
14  
15  
16  
17  
18  
19  
20  
21

#### 22 Management of adverse consequences

23 As a result of being referred for tests or investigations there is a risk of an adverse incident. If referral  
24 rates do increase as a result of access to eRATs, there is an increased risk of an adverse event (AE) to  
25 patients of practices allocated to the intervention. We are not routinely tracking individuals  
26 throughout the trial and there is no mechanism for monitoring any AEs as a result of referral. However,  
27 psychological distress may be a consequence of referral. Individuals for whom cancer is diagnosed at  
28 an early stage may be relieved by the diagnosis and see the psychological distress as justifiable.  
29 Individuals for whom a referral does not lead to a diagnosis of cancer (false positives) may have  
30 undergone unnecessary psychological distress. Our process evaluation work will help us to understand  
31 the extent of this and its potential impact on the individuals' life.  
32  
33  
34  
35  
36  
37  
38  
39

40 During interviews, patients may report being distressed – either as a result of research activity or as a  
41 result of their health, and events in their private lives. Should such a situation arise, the researchers  
42 will implement the trial risk protocol and manage the participant in accordance with this policy.  
43 Participants will be reminded that they have the right to not answer any question, stop the interview  
44 or withdraw from the interview study. Under high-risk situations (e.g. where there is perceived  
45 immediate risk to a participant's health), the study team may be required to break confidentiality, to  
46 inform appropriate authorities who will need to provide essential care services. We will also signpost  
47 participants to sources of support. This information will be outlined in the Participant Information  
48 Sheet. Participants will be informed of possible benefits and known risks of participation in the  
49 interviews by means of a Patient Information Sheet and through discussion with the research team.  
50 Written consent will be obtained immediately prior to the interview study.  
51  
52  
53  
54  
55  
56  
57  
58  
59  
60

1 There are minimal risks to researchers as most interviews will take place in the GP practices or by  
2 telephone/online; however, if a home visit is undertaken to interview patient participants the  
3 researcher will follow the lone worker policy: researchers will make sure that their whereabouts,  
4 contact telephone number and estimated time of return are known to their colleagues and/or  
5 manager. Researchers will also have the opportunity to debrief with a senior colleague on the research  
6 team should they need any support after conducting an interview; this debrief may be in person or by  
7 telephone.  
8  
9  
10  
11  
12  
13

### 14 *Analysis*

15 For the quantitative results the individual data sources will be summarised descriptively, including a  
16 summary of data completeness. For the qualitative data we will adopt a framework approach (27)  
17 which allows the inclusion of key concepts and ideas identified from the literature, alongside themes  
18 emerging from the data. The framework approach produces a structured output matrix, with cells of  
19 data organised by practice and by code (a descriptive label applied to a section of transcript).  
20  
21  
22  
23  
24  
25

26 At least two researchers will work on the analysis. Interviews will be audio recorded, transcribed and  
27 anonymised. Data familiarisation will be achieved through the listening to and reading of interview  
28 recordings and transcripts. Transcripts will be imported into the qualitative data analysis software  
29 package NVivo 11 (QSR International) to facilitate data management, sharing and development of a  
30 coding framework. A proportion of the interview transcripts will be coded by each researcher. The  
31 'constant comparative method' (28) will be utilised: each incident in the data will be compared with  
32 other incidents for similarities and differences and any 'negative cases', where a case does not fit the  
33 pattern or cannot be explained by the emerging analysis, will be explored and recorded. Following this  
34 initial coding, a PPIE meeting (one for the GP interviews and one for the patient interviews) will be  
35 held to discuss the emerging themes from the interviews, and to gain alternative perspectives from  
36 the PPIE group on those themes. Following the PPIE meeting, the analytical framework will be  
37 developed, incorporating researcher and PPIE perspectives on the results, with a final set of themes  
38 and codes being agreed upon.  
39  
40  
41  
42  
43  
44  
45  
46  
47  
48  
49

50 The analytical framework will be applied to all interview transcripts; one researcher will index all  
51 transcripts, with a second researcher indexing a proportion, to check the reliability of the indexing and  
52 to ensure that the themes of the framework are being interpreted consistently. Any differences in  
53 interpretation will be discussed between the two researchers. Following the indexing process, data  
54 will be charted into the structured output matrix, which will summarise the data on each theme from  
55 all transcripts. A subsequent meeting of the PPIE group will be held once all of the results from the  
56 process evaluation have been gathered to gain a users' perspective of the global findings.  
57  
58  
59  
60

1  
2  
3 The final step in the process evaluation analysis will be to integrate results from the various mixed  
4 method data sources using a triangulation protocol(29) to give a more complete picture once  
5 individual data sources have been individually analysed. We plan to create a summary matrix, known  
6 as a convergence coding matrix, which summarises the findings from each data source after assessing  
7 whether the findings are in agreement, partial agreement or no agreement, or whether the data  
8 source is silent for the finding under consideration i.e. when a theme or finding arises from one data  
9 set but not another.  
10  
11  
12  
13  
14  
15

## 16 Reporting

17 The process evaluation results will be briefly summarised for inclusion in the main trial report and  
18 publication, separate dissemination (reports, presentations and publications) will provide further  
19 details of the process evaluation findings.  
20  
21  
22  
23  
24  
25

## 26 Appendix E

### 27 GP Workload

#### 28 *Background and rationale*

29  
30  
31  
32 GPs manage a high and rising workload of increasingly complex patient care with many competing  
33 demands to attend to within ten-minute consultations. (30) This, combined with ongoing recruitment  
34 and retention challenges, has contributed to a GP workforce 'crisis'. (31-36) The workload implications  
35 for GPs of using electronic tools such as eRATs during consultations is unclear.(37) ERICA provides an  
36 opportunity to examine whether the use of eRATs by GPs, and the possible subsequent discussion of  
37 cancer risk with patients, may impact consultation length and patient 'flow' through consulting  
38 sessions. This nested study aims to explore, in terms of consultation time, the impact of GPs using  
39 eRATs on GP workload and patient 'flow' through consulting sessions. It will also explore workload in  
40 the week following the index consultation in which an eRAT was activated, when relevant letters may  
41 be generated, referrals made, investigations followed through, or clinical discussions engaged in.  
42  
43  
44  
45  
46  
47  
48  
49

#### 50 *Objectives*

51 The specific objectives in respect of consultations and sessions are:  
52  
53  
54

55 (i) to measure and compare the duration of consultations and sessions in which an eRAT has been  
56 activated with consultations where eRATs have not been activated;  
57  
58  
59  
60



1 (ii) to measure and compare the duration of subsequent consultations in the same session after an  
2 eRAT has been activated with consultations in sessions where eRATs have not been activated;  
3  
4

5  
6 (iii) to explore the frequency of interactions with patients' medical records by a GP in the week  
7 following a consultation during which an eRAT was activated.  
8  
9

## 10 *Methods*

11 An observational quantitative study will be conducted in a sub-sample of ERICA intervention practices  
12 to examine the durations of consultations and consulting sessions in which eRATs are activated.  
13  
14

### 15 *Sample size*

16 The basis for the sub-study sample size calculation is on the number of consultations likely to occur  
17 over a two-week period within ERICA practices, in which an eRAT will be 'activated' (i.e. an eRAT  
18 prompt is shown and/or clinician uses an eRAT symptom checker). A number of assumptions are of  
19 note:  
20  
21  
22  
23

24 The first assumption is that a half-day GP consulting session, typically lasting four hours and comprised  
25 of ten-minute consultations, would be associated with a total of 24 consultations. Second, practices  
26 have an average headcount of seven GPs (informed by GP workforce data from NHS Digital). (38) Third,  
27 a GP is assumed to work an average of 6.7 half-day consulting sessions per week. (39) An average  
28 practice would therefore provide a total of 1,126 GP consultations per week.  
29  
30  
31  
32  
33

34 Accurate estimations of how often an eRAT will be activated, are not yet established in previous  
35 research on usage of cancer decision tools in UK general practice. (40,41) Two clinical members of the  
36 research team have estimated that an eRAT may be expected to be activated once per GP, per week.  
37 This estimate would suggest that approximately 15% of consulting sessions will involve a consultation  
38 where the eRAT tool was activated.  
39  
40  
41  
42  
43  
44

45 The standard deviation for both the length of a consultation and of a whole consulting session from  
46 previous literature was four minutes and 20 minutes respectively. (42-44) Project team discussion  
47 concluded that a minimally important difference in time for an individual consultation would be  
48 between two and five minutes; for a consulting session this minimally important difference would be  
49 approximately 10 minutes.  
50  
51  
52  
53

54 Statistical power to detect a time difference of between two and five minutes in eRAT consultations  
55 versus non-eRAT consultations is also in excess of >80%, even if eRATs are observed to have been  
56 activated in just 1:40 consulting (2.5% of sessions), the basis of the most conservative estimate. The  
57  
58  
59  
60

1 power to detect a difference of 10 minutes in sessions where eRATs have been activated compared  
2 with sessions where eRATs have not been activated is >80%, even if eRATs affect only 2.5% of sessions.  
3 A two-week observation period would provide sufficient data and power to detect differences in the  
4 length of consultations and sessions where an eRAT is activated and those where an eRAT is not  
5 activated.  
6  
7  
8  
9

## 10 Outcome measures

### 11 Primary outcome

12 The primary outcome is the length of time (in minutes) of consultations. These will be consultations  
13 during which an eRAT is activated and also those during which an eRAT is not activated. For the  
14 purposes of this sub-study, a consultation is defined as starting when the patient's electronic medical  
15 record is opened by a GP, for the purpose of conducting either a face-to-face or telephone/video  
16 interaction with the patient, and ending when the record is closed. Home visits will be excluded due  
17 to difficulty in accessing accurate time information. Consultations with health professionals who  
18 would not make referral decisions (e.g. practice nurses, physiotherapists, pharmacists, healthcare  
19 assistants) will also be excluded.  
20  
21  
22  
23  
24  
25  
26  
27

### 28 Secondary outcomes

29 In addition to our primary outcome, we propose to examine the following secondary outcomes:

- 30 • The length of time (in minutes) of consulting sessions. For the purposes of this study, a session is  
31 defined as a half-day period comprised of individual patients' pre-booked or same-day  
32 consultations. The half-day periods are typically 'morning' or 'afternoon', although some practices  
33 offer early morning and evening sessions as well. (45)  
34
- 35 • The number of instances of opening a patient's electronic medical record in the week following  
36 an eRAT being activated.  
37  
38  
39  
40  
41

### 42 Practice recruitment

43 An initial pilot in up to three ERICA intervention practices will be undertaken and plans for data  
44 collection methods revisited at that point. Practices will be approached by an invitation email and  
45 provided with an information sheet detailing the nature of the study and providing contact details of  
46 the researcher. No individual patients will be recruited.  
47  
48  
49  
50

51 *A note on practice recruitment to the nested studies:* We expect to recruit up to 91 practices across  
52 the nested studies (56 in the health economics nested study, up to 20 in the process evaluation and  
53 up to 15 in the sub-study on GP workload) practices. Practices will only be asked to help with one of  
54 the health economic nested study, the process evaluation nested study, or the GP workload sub-study.  
55  
56  
57  
58  
59  
60

## Data collection

### Identifying consultations where an eRAT is activated

The Process Evaluation describes earlier how a local 'at practice' report will be run for practices in order to collect patient-level data on eRATs usage. This report will be run for practices recruited to this nested study, covering a two-week period.

### Measuring durations of consultations and sessions

The eRATs usage report will provide the start and end time of the tool usage, but not the duration of a consultation. A further search function (developed within SystemOne for this nested study) will provide data on the timings of all consultations occurring between two dates (referred to as the 'appointments report'). The consultations identified in the eRAT usage report will be cross-referenced with the consultations in the appointments report. A variable will be added to denote which consultations involved an eRAT being activated and which did not.

### Measuring workload in the week following an eRAT being activated

The eRATs usage report will identify the relevant patient records for which an audit will be run in SystemOne. The audit will provide data on instances of the records being opened and closed by practice staff during the week following the index activation of an eRAT.

## Data analysis

Data will be analysed in Stata. Descriptive statistics summarising participating practices and GPs will be presented. Although practice level data will be presented, it will be anonymised (e.g. practice A, B, etc) to protect the identities of individual practitioners or practices.

The primary analysis of the durations of consultations in which an eRAT is activated, will take the form of a mixed-effects linear regression with random intercepts to account for clustering within GPs and for GPs clustering within practices. This regression will adjust for consulting GP, time of day, day of week, and consultation mode (face-to-face, telephone, video). Residuals will be checked for normality. As duration data are typically not normally distributed, the data will be transformed if needed, using log transformation. Bootstrapping of the data will also be undertaken if needed. Similar mixed-effects linear regression models with random intercepts will also be performed for secondary outcomes; the duration of consulting sessions, and the number of instances of opening a patient's electronic medical record in the week following an eRAT being activated. For all models where duration is the outcome linear models will be used, but for the count of opening medical records Poisson models will be used.

## *Governance and ethical considerations*

### *Consent*

Individual patient consent is not sought within ERICA for the running of the eRAT usage report. The reports in SystemOne, described for this nested study, will not contain identifiable patient data nor clinically sensitive information and so patient consent for these reports will also not be sought.

### *Data protection/management and confidentiality*

The eRAT usage report and the SystemOne reports will contain pseudo-anonymised data: a patient identifier. However, the reports will contain variables denoting date, time and consulting GP, which will allow cross-referencing, so practices will be asked to delete the patient identifier before sending the report securely and electronically to a secure Exeter CTU computer using a predetermined practice ID number. These measures will ensure the data are anonymised. In the event that the researcher visits the practice to run the SystemOne reports, the files will be anonymised in the same way before the researcher leaves. Practices will keep the original 'master' report files containing the patient's practice computer ID.

### *Finance*

The additional work for the nested study, outside of ERICA costs, is for practices to run the reports in SystemOne and send the report files securely to the researcher. Alternatively, the researcher will visit the practice to run the reports, which may require time of a practice administrator or manager for logging in to the clinical system and orientation. In both scenarios, this time would be covered by nested study research costs at a rate of £50 per hour, and each practice will be offered reimbursement for up to 2 hours. Travel costs for the researcher to visit practices where needed are estimated at £0.45 per mile for a 75 mile round-trip per practice (South West).

**Appendix F.** A simplified schema illustrating the pathways to a cancer diagnosis in the UK. The size of the arrow reflects the approximate proportion of cancers taking each route. The yellow central arrow represents where eRATs are expected to have an effect.

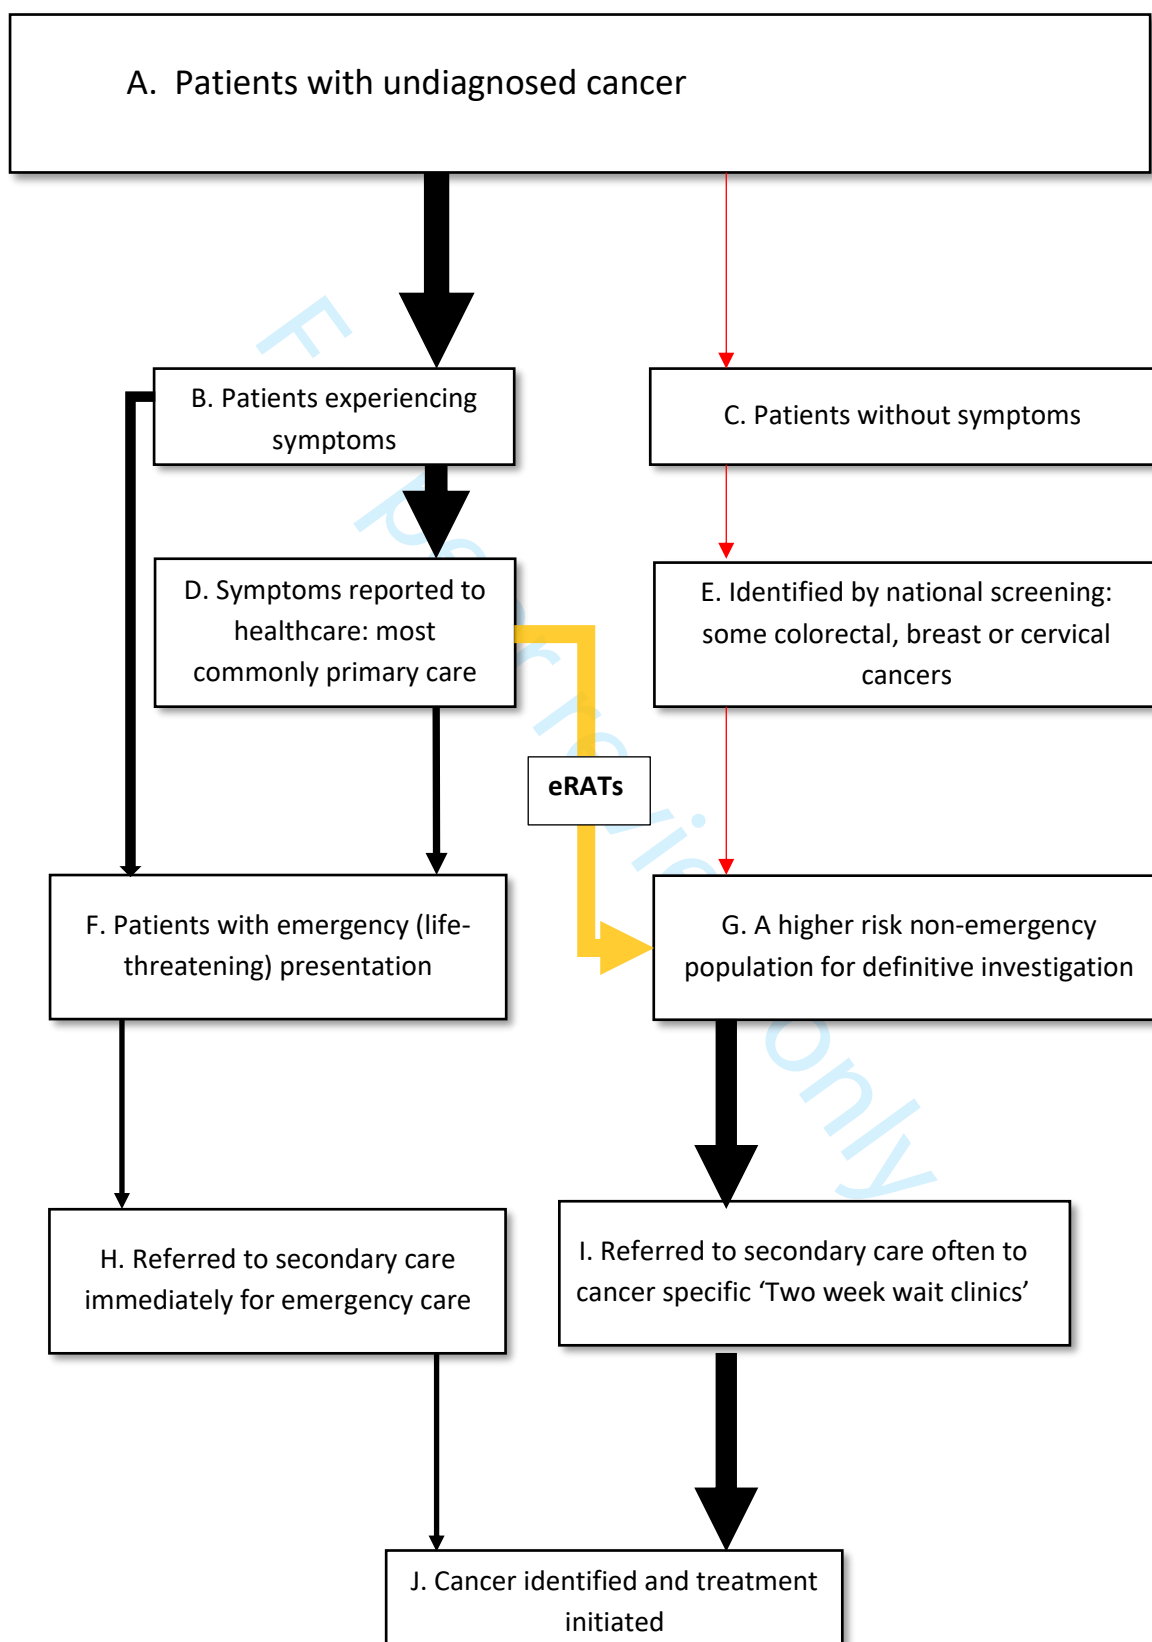

## References

1. Neal RD, Din NU, Hamilton W, Ukoumunne OC, Carter B, Stapley S, et al. Comparison of cancer diagnostic intervals before and after implementation of NICE guidelines: analysis of data from the UK General Practice Research Database. *Br J Cancer*. 2014;110(3):584-92.
2. Pickard AS, Neary MP, Cella D. Estimation of minimally important differences in EQ-5D utility and VAS scores in cancer. *Health and quality of life outcomes*. 2007;5:70-.
3. Kind P, Hardman G, Macran S. UK population norms for EQ-5D. Centre for Health Economics, University of York; 1999.
4. Man M-S, Chaplin K, Mann C, Bower P, Brookes S, Fitzpatrick B, et al. Improving the management of multimorbidity in general practice: protocol of a cluster randomised controlled trial (The 3D Study). *BMJ Open*. 2016;6(4):e011261.
5. Curtis L. Unit Costs of Health and Social Care 2020 [Available from: <https://www.pssru.ac.uk/project-pages/unit-costs/unit-costs-2020/>]. 2020.
6. Department of Health and Social Care. NHS reference costs 2019 to 2020 [Available from: <https://improvement.nhs.uk/resources/reference-costs/>]. 2020.
7. Caro JJ, Briggs AH, Siebert U, Kuntz KM. Modeling good research practices--overview: a report of the ISPOR-SMDM Modeling Good Research Practices Task Force-1. *Medical decision making : an international journal of the Society for Medical Decision Making*. 2012;32(5):667-77.
8. Siebert U, Alagoz O, Bayoumi AM, Jahn B, Owens DK, Cohen DJ, et al. State-Transition Modeling:A Report of the ISPOR-SMDM Modeling Good Research Practices Task Force--3. *Medical Decision Making*. 2012;32(5):690-700.
9. Schwander B, Hiligsmann M, Nuijten M, Evers S. Systematic review and overview of health economic evaluation models in obesity prevention and therapy. *Expert review of pharmacoeconomics & outcomes research*. 2016;16(5):561-70.
10. Wang BC, Furnback W. Modelling the long-term outcomes of bariatric surgery: A review of cost-effectiveness studies. *Best practice & research Clinical gastroenterology*. 2013;27(6):987-95.
11. Andronis L, Barton P, Bryan S. Sensitivity analysis in economic evaluation: an audit of NICE current practice and a review of its use and value in decision-making. *Health Technol Assess*. 2009;13(29):iii, ix-xi, 1-61.
12. Fenwick E, O'Brien BJ, Briggs A. Cost-effectiveness acceptability curves--facts, fallacies and frequently asked questions. *Health economics*. 2004;13(5):405-15.
13. Husereau D, Drummond M, Petrou S, Carswell C, Moher D, Greenberg D, et al. Consolidated Health Economic Evaluation Reporting Standards (CHEERS) statement. *Value Health*. 2013;16(2):e1-5.
14. NICE. Guide to the Methods of Technology Appraisals, Section 5.6 Discounting [Available from: <https://www.nice.org.uk/process/pmg9/chapter/the-reference-case#discounting>]. 2013.
15. Faria R, Gomes M, Epstein D, White IR. A guide to handling missing data in cost-effectiveness analysis conducted within randomised controlled trials. *Pharmacoeconomics*. 2014;32(12):1157-70.
16. Brazier J, Longworth L. NICE DSU Technical Support Document 8: An introduction to the measurement and valuation of health for NICE submissions. In: Health, editor. 2011.
17. Tengs TO, Wallace A. One thousand health-related quality-of-life estimates. *Medical care*. 2000;38(6):583-637.
18. NHS England. (2019) The NHS Long Term Plan [Available from: <https://www.longtermplan.nhs.uk/>].
19. Michie S, van Stralen MM, West R. The behaviour change wheel: a new method for characterising and designing behaviour change interventions. *Implementation science : IS*. 2011;6:42-.
20. Grant A, Treweek S, Dreischulte T, Foy R, Guthrie B. Process evaluations for cluster-randomised trials of complex interventions: a proposed framework for design and reporting. *Trials*. 2013;14:15.
21. Hawe P, Shiell A, Riley T. Complex interventions: how "out of control" can a randomised controlled trial be? *BMJ (Clinical research ed)*. 2004;328(7455):1561-3.
22. Shephard EA, Stapley S, Neal RD, Rose P, Walter FM, Hamilton WT. Clinical features of bladder cancer in primary care. *The British journal of general practice : the journal of the Royal College of General Practitioners*. 2012;62(602):e598-604.
23. Shephard E, Neal R, Rose P, Walter F, Hamilton WT. Clinical features of kidney cancer in primary care: a case-control study using primary care records. *The British journal of general practice : the journal of the Royal College of General Practitioners*. 2013;63(609):e250-5.

24. Hamilton W. The CAPER studies: five case-control studies aimed at identifying and quantifying the risk of cancer in symptomatic primary care patients. *Br J Cancer*. 2009;101 Suppl 2:S80-6.
25. Stapley S, Peters TJ, Neal RD, Rose PW, Walter FM, Hamilton W. The risk of oesophago-gastric cancer in symptomatic patients in primary care: a large case-control study using electronic records. *Br J Cancer*. 2013;108(1):25-31.
26. Yin R. *Case Study Research: Design and Methods*. London: Sage Publications 2003.
27. Ritchie J, Spencer L, O'Connor W. Carrying out Qualitative Analysis. In: Ritchie J, Lewis J, editors. *Qualitative Research Practice, A guide for Social Science Students and Researchers* London: Sage; 2003.
28. Corbin J, Strauss A. *Basics of qualitative research: Techniques and procedures for developing grounded theory*. London: Sage publications; 2014.
29. O'Cathain A, Murphy E, Nicholl J. Three techniques for integrating data in mixed methods studies. *BMJ*. 2010;341:c4587.
30. Hobbs FDR, Bankhead C, Mukhtar T, Stevens S, Perera-Salazar R, Holt T, et al. Clinical workload in UK primary care: a retrospective analysis of 100 million consultations in England, 2007-14. *Lancet* 2016;387:2323-30. [http://dx.doi.org/10.1016/S0140-6736\(16\)00620-6](http://dx.doi.org/10.1016/S0140-6736(16)00620-6)
31. Baird B, Charles A, Honeyman M, Maguire D, Das P. *Understanding pressures in general practice: The Kings Fund*; 2016.
32. Campbell J CR, Sansom A. *Retaining the experienced GP workforce in direct patient care (ReGROUP): final report*. Exeter: University of Exeter Medical School; 2015.
33. Sansom A, Terry R, Fletcher E, Salisbury C, Long L, Richards SH, et al. Why do GPs leave direct patient care and what might help to retain them? A qualitative study of GPs in South West England. *BMJ Open* 2018;8:e019849. <http://dx.doi.org/10.1136/bmjopen-2017-019849>
34. Roland M, Everington S. Tackling the crisis in general practice. *BMJ* 2016;352:i942. <http://dx.doi.org/10.1136/bmj.i942>
35. Fletcher E, Abel GA, Anderson R, Richards SH, Salisbury C, Dean SG, et al. Quitting patient care and career break intentions among general practitioners in South West England: findings of a census survey of general practitioners. *BMJ Open* 2017;7:e015853. <http://dx.doi.org/10.1136/bmjopen-2017-015853>
36. Walker B, Moss, C., Gibson, J., Sutton, M., Spooner, S., Checkland, K. *Tenth National GP Worklife Survey*. Manchester: Policy Research Unit in Commissioning and the Healthcare System Manchester Centre for Health Economics; 2019.
37. Fletcher E, Burns, A., Wiering, B., Lavi, D., Shephard, E., Hamilton, W., Campbell, J. L., Abel, G. *Workload and workflow implications associated with the use of electronic risk assessment tools used by health professionals in general practice: a scoping review*. In: University of Exeter Medical School; 2022.
38. NHS Digital. *General Practice Workforce 30 September 2019*. NHS Digital; 2019. URL: <https://digital.nhs.uk/data-and-information/publications/statistical/general-and-personal-medical-services/final-30-september-2019#resources> (Accessed 11/02/20).
39. Gibson J, Sutton M, Spooner S, Checkland K. *Ninth National GP Worklife Survey 2017*. In; 2017.
40. Moffat J, Ironmonger L. *Clinical Decision Support Tool for Cancer (CDS) Project evaluation report to the Department of Health*; 2014.
41. Robinson R, Poirier V, Watson S. *Using Cancer Decision Support Tools to support the early diagnosis of cancer*; 2017.
42. Salisbury C, Procter S, Stewart K, Bowen L, Purdy S, Ridd M, et al. The content of general practice consultations: cross-sectional study based on video recordings. *British Journal of General Practice* 2013;63:e751. <http://dx.doi.org/10.3399/bjgp13X674431>
43. Elmore N, Burt J, Abel G, Maratos FA, Montague J, Campbell J, et al. Investigating the relationship between consultation length and patient experience: a cross-sectional study in primary care. *Br J Gen Pract* 2016;66:e896-e903. <http://dx.doi.org/10.3399/bjgp16X687733>
44. Orton PK, Pereira Gray D. Factors influencing consultation length in general/family practice. *Fam Pract* 2016;33:529-34. <http://dx.doi.org/10.1093/fampra/cmw056>
45. NHS. *Working life (GP)*. NHS; 2022. URL: <https://www.healthcareers.nhs.uk/explore-roles/doctors/roles-doctors/general-practice-gp/working-life> (Accessed 2022).

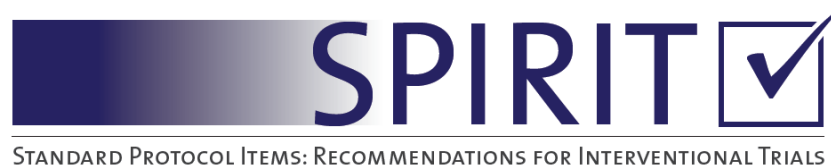

STANDARD PROTOCOL ITEMS: RECOMMENDATIONS FOR INTERVENTIONAL TRIALS

## SPIRIT 2013 Checklist: Recommended items to address in a clinical trial protocol and related documents\*

| Section/item                      | Item No | Description                                                                                                                                                                                                                                                                              | Addressed on page number |
|-----------------------------------|---------|------------------------------------------------------------------------------------------------------------------------------------------------------------------------------------------------------------------------------------------------------------------------------------------|--------------------------|
| <b>Administrative information</b> |         |                                                                                                                                                                                                                                                                                          |                          |
| Title                             | 1       | Descriptive title identifying the study design, population, interventions, and, if applicable, trial acronym                                                                                                                                                                             | Title page               |
| Trial registration                | 2a      | Trial identifier and registry name. If not yet registered, name of intended registry                                                                                                                                                                                                     | 1 & 15                   |
|                                   | 2b      | All items from the World Health Organization Trial Registration Data Set                                                                                                                                                                                                                 | n/a                      |
| Protocol version                  | 3       | Date and version identifier                                                                                                                                                                                                                                                              | 1 & 15                   |
| Funding                           | 4       | Sources and types of financial, material, and other support                                                                                                                                                                                                                              | 15                       |
| Roles and responsibilities        | 5a      | Names, affiliations, and roles of protocol contributors                                                                                                                                                                                                                                  | 15                       |
|                                   | 5b      | Name and contact information for the trial sponsor                                                                                                                                                                                                                                       | 1                        |
|                                   | 5c      | Role of study sponsor and funders, if any, in study design; collection, management, analysis, and interpretation of data; writing of the report; and the decision to submit the report for publication, including whether they will have ultimate authority over any of these activities | 12                       |
|                                   | 5d      | Composition, roles, and responsibilities of the coordinating centre, steering committee, endpoint adjudication committee, data management team, and other individuals or groups overseeing the trial, if applicable (see Item 21a for data monitoring committee)                         | 12-13                    |



1 **Introduction**

2

3 Background and rationale 6a Description of research question and justification for undertaking the trial, including summary of relevant studies (published and unpublished) examining benefits and harms for each intervention 2-3

4

5

6 6b Explanation for choice of comparators 5-7

7

8 Objectives 7 Specific objectives or hypotheses 3-4

9

10 Trial design 8 Description of trial design including type of trial (eg, parallel group, crossover, factorial, single group), allocation ratio, and framework (eg, superiority, equivalence, noninferiority, exploratory) 4

11

12

13

14 **Methods: Participants, interventions, and outcomes**

15

16 Study setting 9 Description of study settings (eg, community clinic, academic hospital) and list of countries where data will be collected. Reference to where list of study sites can be obtained 4

17

18

19 Eligibility criteria 10 Inclusion and exclusion criteria for participants. If applicable, eligibility criteria for study centres and individuals who will perform the interventions (eg, surgeons, psychotherapists) 7

20

21

22 Interventions 11a Interventions for each group with sufficient detail to allow replication, including how and when they will be administered 4-5

23

24

25 11b Criteria for discontinuing or modifying allocated interventions for a given trial participant (eg, drug dose change in response to harms, participant request, or improving/worsening disease) n/a

26

27

28 11c Strategies to improve adherence to intervention protocols, and any procedures for monitoring adherence (eg, drug tablet return, laboratory tests) 14 and Appx D

29

30

31 11d Relevant concomitant care and interventions that are permitted or prohibited during the trial 4-7

32

33

34 Outcomes 12 Primary, secondary, and other outcomes, including the specific measurement variable (eg, systolic blood pressure), analysis metric (eg, change from baseline, final value, time to event), method of aggregation (eg, median, proportion), and time point for each outcome. Explanation of the clinical relevance of chosen efficacy and harm outcomes is strongly recommended 8-9

35

36

37

38

39

40 Participant timeline 13 Time schedule of enrolment, interventions (including any run-ins and washouts), assessments, and visits for participants. A schematic diagram is highly recommended (see Figure) 6

41

42

43

44

45

46

|    |                                                                     |     |                                                                                                                                                                                                                                                                                                                                                                                                              |       |
|----|---------------------------------------------------------------------|-----|--------------------------------------------------------------------------------------------------------------------------------------------------------------------------------------------------------------------------------------------------------------------------------------------------------------------------------------------------------------------------------------------------------------|-------|
| 1  | Sample size                                                         | 14  | Estimated number of participants needed to achieve study objectives and how it was determined, including clinical and statistical assumptions supporting any sample size calculations                                                                                                                                                                                                                        | 6-7   |
| 2  |                                                                     |     |                                                                                                                                                                                                                                                                                                                                                                                                              |       |
| 3  |                                                                     |     |                                                                                                                                                                                                                                                                                                                                                                                                              |       |
| 4  | Recruitment                                                         | 15  | Strategies for achieving adequate participant enrolment to reach target sample size                                                                                                                                                                                                                                                                                                                          | 7     |
| 5  |                                                                     |     |                                                                                                                                                                                                                                                                                                                                                                                                              |       |
| 6  |                                                                     |     |                                                                                                                                                                                                                                                                                                                                                                                                              |       |
| 7  | <b>Methods: Assignment of interventions (for controlled trials)</b> |     |                                                                                                                                                                                                                                                                                                                                                                                                              |       |
| 8  | Allocation:                                                         |     |                                                                                                                                                                                                                                                                                                                                                                                                              |       |
| 9  |                                                                     |     |                                                                                                                                                                                                                                                                                                                                                                                                              |       |
| 10 | Sequence                                                            | 16a | Method of generating the allocation sequence (eg, computer-generated random numbers), and list of any factors for stratification. To reduce predictability of a random sequence, details of any planned restriction (eg, blocking) should be provided in a separate document that is unavailable to those who enrol participants or assign interventions                                                     | 7     |
| 11 | generation                                                          |     |                                                                                                                                                                                                                                                                                                                                                                                                              |       |
| 12 |                                                                     |     |                                                                                                                                                                                                                                                                                                                                                                                                              |       |
| 13 |                                                                     |     |                                                                                                                                                                                                                                                                                                                                                                                                              |       |
| 14 |                                                                     |     |                                                                                                                                                                                                                                                                                                                                                                                                              |       |
| 15 |                                                                     |     |                                                                                                                                                                                                                                                                                                                                                                                                              |       |
| 16 | Allocation                                                          | 16b | Mechanism of implementing the allocation sequence (eg, central telephone; sequentially numbered, opaque, sealed envelopes), describing any steps to conceal the sequence until interventions are assigned                                                                                                                                                                                                    | 7     |
| 17 | concealment                                                         |     |                                                                                                                                                                                                                                                                                                                                                                                                              |       |
| 18 | mechanism                                                           |     |                                                                                                                                                                                                                                                                                                                                                                                                              |       |
| 19 |                                                                     |     |                                                                                                                                                                                                                                                                                                                                                                                                              |       |
| 20 | Implementation                                                      | 16c | Who will generate the allocation sequence, who will enrol participants, and who will assign participants to interventions                                                                                                                                                                                                                                                                                    | 7     |
| 21 |                                                                     |     |                                                                                                                                                                                                                                                                                                                                                                                                              |       |
| 22 |                                                                     |     |                                                                                                                                                                                                                                                                                                                                                                                                              |       |
| 23 |                                                                     |     |                                                                                                                                                                                                                                                                                                                                                                                                              |       |
| 24 | Blinding (masking)                                                  | 17a | Who will be blinded after assignment to interventions (eg, trial participants, care providers, outcome assessors, data analysts), and how                                                                                                                                                                                                                                                                    | 7-8   |
| 25 |                                                                     |     |                                                                                                                                                                                                                                                                                                                                                                                                              |       |
| 26 |                                                                     |     |                                                                                                                                                                                                                                                                                                                                                                                                              |       |
| 27 |                                                                     | 17b | If blinded, circumstances under which unblinding is permissible, and procedure for revealing a participant's allocated intervention during the trial                                                                                                                                                                                                                                                         | n/a   |
| 28 |                                                                     |     |                                                                                                                                                                                                                                                                                                                                                                                                              |       |
| 29 |                                                                     |     |                                                                                                                                                                                                                                                                                                                                                                                                              |       |
| 30 |                                                                     |     |                                                                                                                                                                                                                                                                                                                                                                                                              |       |
| 31 | <b>Methods: Data collection, management, and analysis</b>           |     |                                                                                                                                                                                                                                                                                                                                                                                                              |       |
| 32 |                                                                     |     |                                                                                                                                                                                                                                                                                                                                                                                                              |       |
| 33 | Data collection                                                     | 18a | Plans for assessment and collection of outcome, baseline, and other trial data, including any related processes to promote data quality (eg, duplicate measurements, training of assessors) and a description of study instruments (eg, questionnaires, laboratory tests) along with their reliability and validity, if known. Reference to where data collection forms can be found, if not in the protocol | 9-12  |
| 34 | methods                                                             |     |                                                                                                                                                                                                                                                                                                                                                                                                              |       |
| 35 |                                                                     |     |                                                                                                                                                                                                                                                                                                                                                                                                              |       |
| 36 |                                                                     |     |                                                                                                                                                                                                                                                                                                                                                                                                              |       |
| 37 |                                                                     |     |                                                                                                                                                                                                                                                                                                                                                                                                              |       |
| 38 |                                                                     |     |                                                                                                                                                                                                                                                                                                                                                                                                              |       |
| 39 |                                                                     | 18b | Plans to promote participant retention and complete follow-up, including list of any outcome data to be collected for participants who discontinue or deviate from intervention protocols                                                                                                                                                                                                                    | 11-12 |
| 40 |                                                                     |     |                                                                                                                                                                                                                                                                                                                                                                                                              |       |
| 41 |                                                                     |     |                                                                                                                                                                                                                                                                                                                                                                                                              |       |
| 42 |                                                                     |     |                                                                                                                                                                                                                                                                                                                                                                                                              |       |
| 43 |                                                                     |     |                                                                                                                                                                                                                                                                                                                                                                                                              |       |
| 44 |                                                                     |     |                                                                                                                                                                                                                                                                                                                                                                                                              |       |
| 45 |                                                                     |     |                                                                                                                                                                                                                                                                                                                                                                                                              |       |
| 46 |                                                                     |     |                                                                                                                                                                                                                                                                                                                                                                                                              |       |

|    |                                 |     |                                                                                                                                                                                                                                                                                                                                       |               |
|----|---------------------------------|-----|---------------------------------------------------------------------------------------------------------------------------------------------------------------------------------------------------------------------------------------------------------------------------------------------------------------------------------------|---------------|
| 1  | Data management                 | 19  | Plans for data entry, coding, security, and storage, including any related processes to promote data quality (eg, double data entry; range checks for data values). Reference to where details of data management procedures can be found, if not in the protocol                                                                     | 11-12         |
| 2  |                                 |     |                                                                                                                                                                                                                                                                                                                                       |               |
| 3  |                                 |     |                                                                                                                                                                                                                                                                                                                                       |               |
| 4  |                                 |     |                                                                                                                                                                                                                                                                                                                                       |               |
| 5  | Statistical methods             | 20a | Statistical methods for analysing primary and secondary outcomes. Reference to where other details of the statistical analysis plan can be found, if not in the protocol                                                                                                                                                              | 9-11          |
| 6  |                                 |     |                                                                                                                                                                                                                                                                                                                                       |               |
| 7  |                                 |     |                                                                                                                                                                                                                                                                                                                                       |               |
| 8  |                                 | 20b | Methods for any additional analyses (eg, subgroup and adjusted analyses)                                                                                                                                                                                                                                                              | 11            |
| 9  |                                 |     |                                                                                                                                                                                                                                                                                                                                       |               |
| 10 |                                 | 20c | Definition of analysis population relating to protocol non-adherence (eg, as randomised analysis), and any statistical methods to handle missing data (eg, multiple imputation)                                                                                                                                                       | 11            |
| 11 |                                 |     |                                                                                                                                                                                                                                                                                                                                       |               |
| 12 |                                 |     |                                                                                                                                                                                                                                                                                                                                       |               |
| 13 |                                 |     |                                                                                                                                                                                                                                                                                                                                       |               |
| 14 | <b>Methods: Monitoring</b>      |     |                                                                                                                                                                                                                                                                                                                                       |               |
| 15 |                                 |     |                                                                                                                                                                                                                                                                                                                                       |               |
| 16 | Data monitoring                 | 21a | Composition of data monitoring committee (DMC); summary of its role and reporting structure; statement of whether it is independent from the sponsor and competing interests; and reference to where further details about its charter can be found, if not in the protocol. Alternatively, an explanation of why a DMC is not needed | 12-13         |
| 17 |                                 |     |                                                                                                                                                                                                                                                                                                                                       |               |
| 18 |                                 |     |                                                                                                                                                                                                                                                                                                                                       |               |
| 19 |                                 |     |                                                                                                                                                                                                                                                                                                                                       |               |
| 20 |                                 |     |                                                                                                                                                                                                                                                                                                                                       |               |
| 21 |                                 |     |                                                                                                                                                                                                                                                                                                                                       |               |
| 22 |                                 | 21b | Description of any interim analyses and stopping guidelines, including who will have access to these interim results and make the final decision to terminate the trial                                                                                                                                                               | n/a           |
| 23 |                                 |     |                                                                                                                                                                                                                                                                                                                                       |               |
| 24 |                                 |     |                                                                                                                                                                                                                                                                                                                                       |               |
| 25 | Harms                           | 22  | Plans for collecting, assessing, reporting, and managing solicited and spontaneously reported adverse events and other unintended effects of trial interventions or trial conduct                                                                                                                                                     | 9, Appendix D |
| 26 |                                 |     |                                                                                                                                                                                                                                                                                                                                       |               |
| 27 |                                 |     |                                                                                                                                                                                                                                                                                                                                       |               |
| 28 | Auditing                        | 23  | Frequency and procedures for auditing trial conduct, if any, and whether the process will be independent from investigators and the sponsor                                                                                                                                                                                           | n/a           |
| 29 |                                 |     |                                                                                                                                                                                                                                                                                                                                       |               |
| 30 |                                 |     |                                                                                                                                                                                                                                                                                                                                       |               |
| 31 |                                 |     |                                                                                                                                                                                                                                                                                                                                       |               |
| 32 | <b>Ethics and dissemination</b> |     |                                                                                                                                                                                                                                                                                                                                       |               |
| 33 |                                 |     |                                                                                                                                                                                                                                                                                                                                       |               |
| 34 | Research ethics approval        | 24  | Plans for seeking research ethics committee/institutional review board (REC/IRB) approval                                                                                                                                                                                                                                             | 15            |
| 35 |                                 |     |                                                                                                                                                                                                                                                                                                                                       |               |
| 36 |                                 |     |                                                                                                                                                                                                                                                                                                                                       |               |
| 37 | Protocol amendments             | 25  | Plans for communicating important protocol modifications (eg, changes to eligibility criteria, outcomes, analyses) to relevant parties (eg, investigators, REC/IRBs, trial participants, trial registries, journals, regulators)                                                                                                      | 12-13         |
| 38 |                                 |     |                                                                                                                                                                                                                                                                                                                                       |               |
| 39 |                                 |     |                                                                                                                                                                                                                                                                                                                                       |               |
| 40 |                                 |     |                                                                                                                                                                                                                                                                                                                                       |               |
| 41 |                                 |     |                                                                                                                                                                                                                                                                                                                                       |               |
| 42 |                                 |     |                                                                                                                                                                                                                                                                                                                                       |               |

|    |                               |     |                                                                                                                                                                                                                                                                                     |                                                                                                              |
|----|-------------------------------|-----|-------------------------------------------------------------------------------------------------------------------------------------------------------------------------------------------------------------------------------------------------------------------------------------|--------------------------------------------------------------------------------------------------------------|
| 1  | Consent or assent             | 26a | Who will obtain informed consent or assent from potential trial participants or authorised surrogates, and how (see Item 32)                                                                                                                                                        | 11 & Appendices B & D (only relevant for nested studies)                                                     |
| 2  |                               |     |                                                                                                                                                                                                                                                                                     |                                                                                                              |
| 3  |                               |     |                                                                                                                                                                                                                                                                                     |                                                                                                              |
| 4  |                               |     |                                                                                                                                                                                                                                                                                     |                                                                                                              |
| 5  |                               | 26b | Additional consent provisions for collection and use of participant data and biological specimens in ancillary studies, if applicable                                                                                                                                               | 11 & Appendices B & D (only relevant for nested studies)                                                     |
| 6  |                               |     |                                                                                                                                                                                                                                                                                     |                                                                                                              |
| 7  |                               |     |                                                                                                                                                                                                                                                                                     |                                                                                                              |
| 8  |                               |     |                                                                                                                                                                                                                                                                                     |                                                                                                              |
| 9  | Confidentiality               | 27  | How personal information about potential and enrolled participants will be collected, shared, and maintained in order to protect confidentiality before, during, and after the trial                                                                                                | 11-12                                                                                                        |
| 10 |                               |     |                                                                                                                                                                                                                                                                                     |                                                                                                              |
| 11 |                               |     |                                                                                                                                                                                                                                                                                     |                                                                                                              |
| 12 |                               |     |                                                                                                                                                                                                                                                                                     |                                                                                                              |
| 13 | Declaration of interests      | 28  | Financial and other competing interests for principal investigators for the overall trial and each study site                                                                                                                                                                       | 15                                                                                                           |
| 14 |                               |     |                                                                                                                                                                                                                                                                                     |                                                                                                              |
| 15 |                               |     |                                                                                                                                                                                                                                                                                     |                                                                                                              |
| 16 | Access to data                | 29  | Statement of who will have access to the final trial dataset, and disclosure of contractual agreements that limit such access for investigators                                                                                                                                     | 14                                                                                                           |
| 17 |                               |     |                                                                                                                                                                                                                                                                                     |                                                                                                              |
| 18 |                               |     |                                                                                                                                                                                                                                                                                     |                                                                                                              |
| 19 | Ancillary and post-trial care | 30  | Provisions, if any, for ancillary and post-trial care, and for compensation to those who suffer harm from trial participation                                                                                                                                                       | n/a                                                                                                          |
| 20 |                               |     |                                                                                                                                                                                                                                                                                     |                                                                                                              |
| 21 |                               |     |                                                                                                                                                                                                                                                                                     |                                                                                                              |
| 22 | Dissemination policy          | 31a | Plans for investigators and sponsor to communicate trial results to participants, healthcare professionals, the public, and other relevant groups (eg, via publication, reporting in results databases, or other data sharing arrangements), including any publication restrictions | 14                                                                                                           |
| 23 |                               |     |                                                                                                                                                                                                                                                                                     |                                                                                                              |
| 24 |                               |     |                                                                                                                                                                                                                                                                                     |                                                                                                              |
| 25 |                               |     |                                                                                                                                                                                                                                                                                     |                                                                                                              |
| 26 |                               |     |                                                                                                                                                                                                                                                                                     |                                                                                                              |
| 27 |                               | 31b | Authorship eligibility guidelines and any intended use of professional writers                                                                                                                                                                                                      | 14                                                                                                           |
| 28 |                               |     |                                                                                                                                                                                                                                                                                     |                                                                                                              |
| 29 |                               | 31c | Plans, if any, for granting public access to the full protocol, participant-level dataset, and statistical code                                                                                                                                                                     | 14                                                                                                           |
| 30 |                               |     |                                                                                                                                                                                                                                                                                     |                                                                                                              |
| 31 | <b>Appendices</b>             |     |                                                                                                                                                                                                                                                                                     |                                                                                                              |
| 32 |                               |     |                                                                                                                                                                                                                                                                                     |                                                                                                              |
| 33 | Informed consent materials    | 32  | Model consent form and other related documentation given to participants and authorised surrogates                                                                                                                                                                                  | Not applicable for main trial. Multiple documents for each nested study, available from authors upon request |
| 34 |                               |     |                                                                                                                                                                                                                                                                                     |                                                                                                              |
| 35 |                               |     |                                                                                                                                                                                                                                                                                     |                                                                                                              |
| 36 |                               |     |                                                                                                                                                                                                                                                                                     |                                                                                                              |
| 37 |                               |     |                                                                                                                                                                                                                                                                                     |                                                                                                              |
| 38 |                               |     |                                                                                                                                                                                                                                                                                     |                                                                                                              |
| 39 |                               |     |                                                                                                                                                                                                                                                                                     |                                                                                                              |
| 40 |                               |     |                                                                                                                                                                                                                                                                                     |                                                                                                              |
| 41 |                               |     |                                                                                                                                                                                                                                                                                     |                                                                                                              |
| 42 |                               |     |                                                                                                                                                                                                                                                                                     |                                                                                                              |
| 43 |                               |     |                                                                                                                                                                                                                                                                                     |                                                                                                              |
| 44 |                               |     |                                                                                                                                                                                                                                                                                     |                                                                                                              |
| 45 |                               |     |                                                                                                                                                                                                                                                                                     |                                                                                                              |
| 46 |                               |     |                                                                                                                                                                                                                                                                                     |                                                                                                              |

1 Biological 33 Plans for collection, laboratory evaluation, and storage of biological specimens for genetic or molecular n/a  
2 specimens analysis in the current trial and for future use in ancillary studies, if applicable  
3

---

4 \*It is strongly recommended that this checklist be read in conjunction with the SPIRIT 2013 Explanation & Elaboration for important clarification on the items.  
5 Amendments to the protocol should be tracked and dated. The SPIRIT checklist is copyrighted by the SPIRIT Group under the Creative Commons  
6 [“Attribution-NonCommercial-NoDerivs 3.0 Unported”](#) license.  
7  
8  
9  
10  
11  
12  
13  
14  
15  
16  
17  
18  
19  
20  
21  
22  
23  
24  
25  
26  
27  
28  
29  
30  
31  
32  
33  
34  
35  
36  
37  
38  
39  
40  
41  
42  
43  
44  
45  
46

For peer review only

# BMJ Open

## Protocol for a pragmatic cluster randomised controlled trial assessing the clinical effectiveness and cost-effectiveness of electronic risk-assessment for cancer for patients in general practice (ERICA)

|                                 |                                                                                                                                                                                                                                                                                                                                                                                                                                                                                                                                                                                                                                                                                                                                                                                                                                                                                                                                                                                                                                          |
|---------------------------------|------------------------------------------------------------------------------------------------------------------------------------------------------------------------------------------------------------------------------------------------------------------------------------------------------------------------------------------------------------------------------------------------------------------------------------------------------------------------------------------------------------------------------------------------------------------------------------------------------------------------------------------------------------------------------------------------------------------------------------------------------------------------------------------------------------------------------------------------------------------------------------------------------------------------------------------------------------------------------------------------------------------------------------------|
| Journal:                        | <i>BMJ Open</i>                                                                                                                                                                                                                                                                                                                                                                                                                                                                                                                                                                                                                                                                                                                                                                                                                                                                                                                                                                                                                          |
| Manuscript ID                   | bmjopen-2022-065232.R2                                                                                                                                                                                                                                                                                                                                                                                                                                                                                                                                                                                                                                                                                                                                                                                                                                                                                                                                                                                                                   |
| Article Type:                   | Protocol                                                                                                                                                                                                                                                                                                                                                                                                                                                                                                                                                                                                                                                                                                                                                                                                                                                                                                                                                                                                                                 |
| Date Submitted by the Author:   | 27-Feb-2023                                                                                                                                                                                                                                                                                                                                                                                                                                                                                                                                                                                                                                                                                                                                                                                                                                                                                                                                                                                                                              |
| Complete List of Authors:       | Hamilton, Willie; University of Exeter, Primary Care Diagnostics<br>Mounce, Luke; University of Exeter, Institute of Health Research<br>Abel, Gary; University of Exeter, University of Exeter Medical School (Primary Care)<br>Dean, Sarah; PenCLAHRC University of Exeter Medical School,<br>Campbell, John; University of Exeter, Primary Care<br>Warren, Fiona; University of Exeter Medical School, Institute of Health Research<br>Spencer, Anne; University of Exeter Medical School, Health Economics<br>Medina-Lara, Antonietta; University of Exeter Medical School, Health Economics Group<br>Pitt, Martin; University of Exeter, University of Exeter: Medical School<br>Shephard, Elizabeth; University of Exeter,<br>Shakespeare, Marijke; University of Exeter Medical School, Primary Care<br>Fletcher, Emily; University of Exeter Medical School, Primary Care Research Group<br>Mercer, Adrian; University of Exeter Medical School, Primary Care<br>Calitri, Raff; University of Exeter Medical School, Primary Care |
| <b>Primary Subject Heading</b>: | General practice / Family practice                                                                                                                                                                                                                                                                                                                                                                                                                                                                                                                                                                                                                                                                                                                                                                                                                                                                                                                                                                                                       |
| Secondary Subject Heading:      | Health services research                                                                                                                                                                                                                                                                                                                                                                                                                                                                                                                                                                                                                                                                                                                                                                                                                                                                                                                                                                                                                 |
| Keywords:                       | HEALTH SERVICES ADMINISTRATION & MANAGEMENT, Risk management < HEALTH SERVICES ADMINISTRATION & MANAGEMENT, PRIMARY CARE, Clinical trials < THERAPEUTICS                                                                                                                                                                                                                                                                                                                                                                                                                                                                                                                                                                                                                                                                                                                                                                                                                                                                                 |
|                                 |                                                                                                                                                                                                                                                                                                                                                                                                                                                                                                                                                                                                                                                                                                                                                                                                                                                                                                                                                                                                                                          |

SCHOLARONE™  
Manuscripts

1  
2  
3  
4  
5  
6  
7  
8  
9  
10  
11  
12  
13  
14  
15  
16  
17  
18  
19  
20  
21  
22  
23  
24  
25  
26  
27  
28  
29  
30  
31  
32  
33  
34  
35  
36  
37  
38  
39  
40  
41  
42  
43  
44  
45  
46  
47  
48  
49  
50  
51  
52  
53  
54  
55  
56  
57  
58  
59  
60

## Protocol for a pragmatic cluster randomised controlled trial assessing the clinical effectiveness and cost-effectiveness of electronic risk-assessment for cancer for patients in general practice (ERICA)

Willie Hamilton,<sup>1</sup> Luke Mounce,<sup>1</sup> Gary Abel,<sup>1</sup> Sarah Dean,<sup>1</sup> John Campbell,<sup>1</sup> Fiona Warren,<sup>1</sup> Anne Spencer,<sup>1</sup> Antonieta Medina-Lara,<sup>1</sup> Martin Pitt,<sup>1</sup> Elizabeth Shephard,<sup>1</sup> Marijke Shakespeare,<sup>1</sup> Emily Fletcher,<sup>1</sup> Adrian Mercer,<sup>1</sup> Raff Calitri.<sup>1</sup>

<sup>1</sup>University of Exeter, St Luke's campus, Exeter, EX1 2LU

Willie Hamilton, Professor of Primary Care Diagnostics: [w.hamilton@exeter.ac.uk](mailto:w.hamilton@exeter.ac.uk), ORCID ID 0000-0003-1611-1373 (Corresponding author)

Luke Mounce, Research Fellow: [l.t.a.mounce@exeter.ac.uk](mailto:l.t.a.mounce@exeter.ac.uk), ORCID ID 0000-0002-6089-0661

Gary Abel, Associate Professor: [g.a.abel@exeter.ac.uk](mailto:g.a.abel@exeter.ac.uk), ORCID ID 0000-0003-2231-5161

Sarah G Dean, Professor in Psychology Applied to Rehabilitation and Health: [s.dean@exeter.ac.uk](mailto:s.dean@exeter.ac.uk), ORCID ID 0000-0002-3682-5149

John Campbell, Professor of General Practice and Primary Care: [john.compbell@exeter.ac.uk](mailto:john.compbell@exeter.ac.uk), ORCID ID 0000-0002-6752-3493

Fiona Warren, Senior Lecturer in Medical Statistics: [f.c.warren@exeter.ac.uk](mailto:f.c.warren@exeter.ac.uk), ORCID ID 0000-0002-3833-0182

Anne Spencer, Associate Professor: [a.e.spencer@exeter.ac.uk](mailto:a.e.spencer@exeter.ac.uk), ORCID ID 0000-0002-8163-3103

Antonieta Medina-Lara, Associate Professor in Health Economics: [a.medina-lara@exeter.ac.uk](mailto:a.medina-lara@exeter.ac.uk), ORCID ID 0000-0001-7325-8246

Martin Pitt, Professor of Applied Healthcare Modelling and Data Science: [m.pitt@exeter.ac.uk](mailto:m.pitt@exeter.ac.uk)

Elizabeth Shephard, Research Fellow: [e.a.shephard@exeter.ac.uk](mailto:e.a.shephard@exeter.ac.uk), ORCID ID 0000-0002-3610-3680

Marijke Shakespeare, Trial coordinator: [m.shakespeare@exeter.ac.uk](mailto:m.shakespeare@exeter.ac.uk)

Emily Fletcher, Research Fellow: [e.fletcher@exeter.ac.uk](mailto:e.fletcher@exeter.ac.uk), ORCID ID 0000-0003-1319-3051

Adrian Mercer, PPIE Representative, [zante256@gmail.com](mailto:zante256@gmail.com)

Raff Calitri, Research Fellow and Trial Manager, [r.calitri@exeter.ac.uk](mailto:r.calitri@exeter.ac.uk), ORCID ID 0000-0003-0889-4670

## Abstract

**Introduction.** The UK has worse cancer outcomes than most comparable countries, with a large contribution attributed to diagnostic delay. Electronic risk assessment tools (eRATs) have been developed to identify primary care patients with a  $\geq 2\%$  risk of cancer using features recorded in the electronic record.

**Methods and analysis.** This is a pragmatic cluster randomised controlled trial in English primary care. Individual general practices will be randomised in a 1:1 ratio to intervention (provision of eRATs for six common cancer sites) or to usual care. The primary outcome is cancer stage at diagnosis, dichotomised to stage 1 or 2 (early) or stage 3 or 4 (advanced) for these six cancers, assessed from national cancer registry data. Secondary outcomes include stage at diagnosis for a further six cancers without eRATs, use of urgent referral cancer pathways, total practice cancer diagnoses, routes to cancer diagnosis, and 30-day and 1-year cancer survival. Economic and process evaluations will be performed along with service delivery modelling. The primary analysis explores the proportion of cancer patients with early stage at diagnosis. The sample size calculation used an odds ratio of 0.8 for a cancer being diagnosed at advanced stage in the intervention arm compared with the control arm, equating to an absolute reduction of 4.8% as an incidence-weighted figure across the six cancers. This requires 530 practices overall, with the intervention active from April 2022 for 2 years.

**Ethics and dissemination.** The trial has approval from London City & East Research Ethics committee, reference number 19/LO/0615; protocol version 5.0, 9<sup>th</sup> May 2022. It is sponsored by the University of Exeter. Dissemination will be by journal publication, conferences, use of appropriate social media and direct sharing with cancer policymakers.

**Registration.** The trial is registered with ISRCTN: (trial no: ISRCTN22560297).

*Word Count: 5665*

**Key words:** Early cancer diagnosis, randomised controlled trial, clinical risk-assessment tools, General Practice



---

## Article summary

### Strengths and limitations of this study

- Improvements in primary care are seen as a key for improving early cancer diagnosis in the UK, and this trial is targeting that part of the diagnostic pathway.
  - This is a large, definitive trial, powered to identify a clinically important difference in cancer stage at diagnosis.
  - The trial is designed to minimise impact on participating practices with outcome data being obtained from routinely collected National Health Service data.
  - One limitation is that the UK's national imperative to improve cancer diagnosis after the COVID pandemic may mean use of other interventions (or eRATs themselves) are encouraged by policymakers, reducing the validity and reliability of the trial.
- 

### Introduction

An estimated 10,000 UK cancer deaths each year would not occur if the UK matched the outcomes of other European countries.(1) Much of the difference is attributed to diagnostic delay.(2) The NHS Long Term plan, published in January 2019, specifically targets an increase in the percentage of cancer patients whose cancer is stage 1 or 2 (thus potentially curable) at diagnosis to rise from the current 54% to 75% by 2028.(3) Diagnosis of cancer may occur by several routes, but the main ones are population screening, and diagnosis after symptoms have occurred. Although screening for cancer is effective for colorectal, breast, lung and cervical cancers,(4-6) less than 10% of the total new UK cancers are identified by this route. Most of the remainder are diagnosed after presenting with symptoms, usually to primary care. Of patients with cancer, just under 20% present with an emergency complication of their cancer; however, many of these patients have previously reported symptoms attributable to their cancer to primary care, but this presentation did not lead to a diagnosis of cancer.(7) Within general practice, many studies have aimed at identifying the symptoms of possible cancer and quantifying their predictive value.(8) One main output has been Risk Assessment Tools (generally abbreviated to RATs); these give precise estimates of the chance of an underlying cancer as a percentage figure. RATs provide precise estimates for single symptoms (e.g. the risk of cancer of the lung for a person aged 40 years or more with haemoptysis is 2.4%), as pairs of symptoms (haemoptysis accompanied by loss of weight is 9.2%) or as repeated symptoms (a re-attendance with haemoptysis is 17%).(9) RATs are published for the 18 most common adult cancers, accounting for nearly 90% of the total cancer burden. These publications have been highly influential: in particular, they strongly contributed to the National Institute of Healthcare Excellence (NICE) guideline, Suspected cancer: recognition and referral [NG12], which guides symptomatic diagnosis of cancer in the UK.(10)

1  
2  
3  
4  
5  
6  
7  
8  
9  
10  
11  
12  
13  
14  
15  
16  
17  
18  
19  
20  
21  
22  
23  
24  
25  
26  
27  
28  
29  
30  
31  
32  
33  
34  
35  
36  
37  
38  
39  
40  
41  
42  
43  
44  
45  
46  
47  
48  
49  
50  
51  
52  
53  
54  
55  
56  
57  
58  
59  
60

The initial RATs, of paper, mouse mat, calendar, or web-based forms, increased cancer diagnostic activity,(11) though impacts on hard outcomes such as stage at diagnosis or cancer survival were unknown. Electronic RATs (eRATs) for seven major cancers (lung, colorectal, pancreas, oesophago-gastric, bladder, kidney and ovary) have been developed for the two largest UK primary care electronic healthcare record systems, SystmOne and EMIS, used in around 80% of English practices. The software performs daily calculations of individual cancer risk in patients aged 40 and over, using coded symptoms and laboratory results in the patient's record over the past year, and prompts the general practitioner (GP) when the risk of one or more of these cancers is equal to or above 2%. Some form of electronic clinical decision support for cancer diagnosis has been downloaded by practices and used by at least one practice member in approximately 12% of English practices.(12). Two systematic reviews recently concluded that more research evidence was needed for impact on time to diagnosis and treatment, stage at diagnosis, and health outcomes, as well as research to understand how tools are used in GP consultations.(13) A feasibility trial of the oesophago-gastric eRAT published after these systematic reviews reported installation and regulatory problems that severely restricted usage,(14) and a vignette study of the colorectal RAT suggested it changed the GP's inclination to refer in 26% of usages.(15)

One crucial aspect of eRAT research relates to cost-effectiveness: annual NHS spending on cancer diagnosis is approximately £1bn.(16) Observational data showed increased use of the urgent cancer referral system to improve survival,(17) but there is insufficient data to inform a cost-effectiveness analysis of the subject.(13)

## Objectives

The overarching aim of the trial is to assess the clinical and cost-effectiveness of using eRATs for six cancer sites – colorectal, lung, bladder, kidney, oesophago-gastric and ovarian cancers - compared with usual care for patients in general practice. Our hypothesis is that provision of eRATs will expedite the diagnosis of symptomatic cancer resulting in better cancer outcomes.

The primary objective is to compare the effects of using eRATs (vs usual care) on the percentage of patients with a newly diagnosed cancer at one of the six sites whose cancer is staged as being stage 1 or 2 (versus stage 3 or 4).

A secondary objective is to investigate differences in the stage at diagnosis of a further six cancers without eRATs (combined): breast, melanoma, prostate, Non-Hodgkin lymphoma, larynx and uterus. This is to investigate the possibility of an effect whereby eRATs are associated with increased

1 diagnostic activity beyond the eRAT cancers. We will also investigate differences in: the number of  
2 patients diagnosed with the six eRAT cancers combined, and the total number of cancers (excluding  
3 non-melanoma skin cancer) diagnosed, use of the 2-week wait referral system (the main pathway for  
4 urgent investigation of possible cancer in England) or equivalent for the six eRAT cancers combined,  
5 and across all cancers; the routes to diagnosis for each of the six eRAT cancers,(18) and for the six  
6 comparator non-eRAT cancers; the proportion of patients on a 2-week wait pathway receiving a  
7 diagnosis of cancer; whether a patient on a 2-week wait pathway has a diagnosis of cancer established  
8 (or refuted) within 28 days; 30-day and 1-year survival for those with cancer; the rate of cancer  
9 investigations, namely colonoscopies, sigmoidoscopies, upper gastro-intestinal endoscopies, chest x-  
10 rays, abdominal ultrasounds, and abdominal CT scans. We will also conduct parallel cost-effectiveness  
11 analyses, service delivery modelling and a process evaluation.

## 21 **Methods and analysis**

### 23 ***Design and setting***

24 The study is a pragmatic cluster randomised-controlled trial in England, in primary care medical  
25 practices using one of the two (SystemOne or EMIS) electronic record keeping systems. The clusters  
26 are practices, a term which includes single practices, and small groups of practices agglomerated  
27 administratively to single entities. These will be randomised 1:1 to receive either the intervention  
28 (access to the suite of eRATs) or usual care. Appendix A shows [pathways to a cancer diagnosis in the](#)  
29 [UK](#) and illustrates how the intervention is expected to have an effect. It is unrealistic to offer eRATs  
30 to individual GPs, as there would be considerable contamination within any practice. Nevertheless,  
31 for a practice to be eligible to take part, we ask at least 50% of GPs in that practice to agree to use the  
32 eRATs. Although the intervention is at the practice level, some process and resource use measures  
33 and all main trial primary and secondary outcomes relate to individual patients.

### 43 ***Intervention***

#### 45 **The eRATs**

46 The eRATs have been developed by a specialist IT team, Informatica systems Ltd, in partnership with  
47 the cancer charity, Macmillan. The risk estimates in the eRATs are from the original research papers  
48 for each cancer site. (9, 19-24) Practices will access the software via a new cloud-based system called  
49 Skyline, specifically designed to facilitate efficient integration into GP clinical systems. CA marking of  
50 the Skyline version of eRATs was obtained in September 2021.

51 The eRATs have multiple functions. The first is the '*prompt*'. This collates relevant coded symptoms  
52 and blood tests in the patient's medical record from the previous 12 months, which are then assessed  
53 for the possibility of cancer, generating a risk score equivalent to the positive predictive value of the  
54  
55  
56  
57  
58  
59  
60

1 cancer features for each cancer. A prompt (pop-up), displaying the risk score(s), appears on screen  
2 when a registered user opens a patient's medical records and indicates that patient has a risk of 2%  
3 or higher for at least one of the studied cancers. A second function is the 'symptom checker', allowing  
4 the clinician to add additional patient's symptoms to the eRAT checklist on screen; this process  
5 automatically recalculates the risk of any of the six cancers. On reviewing the risk score from the  
6 prompt and/or symptom checker, the clinician then decides the best course of management, which  
7 may be: (i) clinical review in primary care; (ii) ordering of test/investigations; or (iii) referral into  
8 secondary care. Embedded within all eRATS are links to authoritative guidance regarding the early  
9 diagnosis of cancer, NICE NG12,(25), Macmillan's abbreviated NICE guidance,(26) and Cancer  
10 Research UK guidance. (27) These sources of information are added to assist management of the  
11 patient, but the decision whether – or not – to investigate is for the clinician and patient. Some EMIS  
12 practices also have access to the QCancer risk tool, (28) albeit embedded in a dormant state within  
13 the practice IT and record system, and requiring manual activation prior to operation. All practices will  
14 be asked not to use it during the trial.

### 26 Justification of cancer sites

27 RATs are available for 18 adult cancers, each varying in their incidence, ease of diagnosis, amenability  
28 to treatment and proportion presenting as an emergency.

29 We elected to study cancer sites a) which were in the top 15 cancers by incidence; b) for which curative  
30 treatment is reasonably possible in symptomatic patients;(29) and c) with a significant percentage of  
31 patients presenting as an emergency.(30). Using these criteria, six cancer sites were selected,  
32 amounting to approximately half of all incident cancers. The selected six were: lung, colorectal,  
33 oesophago-gastric, ovary, kidney and bladder. The remaining nine cancers were considered as  
34 comparators to examine for any practice level effect of increased cancer diagnostic activity. Three of  
35 these nine cancers, brain, pancreas and leukaemia, were removed for clinical and practical reasons:  
36 no eRAT is available for brain or leukaemia; in both brain and pancreas, symptomatic diagnosis is  
37 considered to have a very small likelihood of improving survival,(29) and in leukaemia, a full blood  
38 count (easily available in primary care) will usually establish the diagnosis, making an eRAT unlikely to  
39 expedite the diagnosis.(31)

### 54 Training practices in using eRATs

55 Training in the use of the eRATs uses short, pre-recorded videos available online co-ordinated by a  
56 practice 'research champion'. These show GPs how to use the prompt and symptom checker  
57 functions.  
58  
59  
60

### Duration of intervention

Practice recruitment started in August 2019 and is expected to finish at the end of March 2022, including the installation of the eRATs software. The trial was paused for 6 months in March 2020 due to Covid-19. The formal start of the intervention window will be 01/04/2022 (although some practices may have delayed installation) and will close for all intervention practices on 31/3/2024.

### Usual care

Patients presenting to the control practices will experience the GP's usual diagnostic approach. GPs in control practices will have no specific on-screen prompt, though they may have access to hard-copy (e.g. paper or mouse mat) versions of the RATs, or to other cancer tools such as those supporting structured follow-up of symptomatic patients not selected for initial investigation. For EMIS practices with Qcancer dormant in the system, control practices are expected to leave it dormant. We will document control practice use of RATs, other decision support tools, and access to and use of eRATs via interim and exit questionnaires completed within the first 12 months of a practice commencing the intervention and at the end of the trial. In line with intervention practices, trial time will formally begin for control practices on 01/04/2022 and end on 31/03/2024.

### Data collection window

Outcome data for all practices will be obtained for the 2-year period from 01/06/2022 to 29/05/2024. This data collection window is lagged behind the trial time window (01/04/2022 to 31/03/2024) in order to: a) provide some time for practices to become accustomed to how the intervention functions prior to data collection, and b) to have a 2-month window following the end of the intervention window in order to allow cancers to be diagnosed in patients seen towards the end of that window.

### Sample size

There are around 130,000 new diagnoses of the six included cancers in the UK annually.<sup>(32)</sup> As each of our six cancer sites has different proportions diagnosed at an early stage, the sample size calculation is based on a relative improvement in staging, using an odds ratio of 0.8 for a cancer being diagnosed at Stage 3/4 in the intervention arm compared with the control arm. This difference is quite large and equates to an absolute reduction of 4.8% in the intervention arm as an incidence-weighted figure across the six cancers. A much smaller improvement would still be clinically valuable but would necessitate an impossibly large trial.

For the inflation factor we have used an intra-cluster correlation coefficient based on our previous work, of 0.05.<sup>(33)</sup> An average cluster size of 23 patients with a diagnosed cancer with recorded stage

1 during 2-year follow-up is expected, with a coefficient of variation for cluster size of 0.7, giving a design  
2 effect of 2.66. For an individually randomised trial with 90% power and an alpha threshold of 0.05, the  
3 sample size would be 2,049 patients per arm. Adding in the design effect, this becomes 5,497 patients,  
4 requiring 239 practices per arm, and 478 practices in total. Due to changes in practice structure (such  
5 as practice mergers, closures or divisions), we anticipate the loss of up to 10% of recruited practices  
6 over the course of the trial; to account for this we will recruit a target of 530 practices overall,  
7 expecting 12,190 patients to be diagnosed with cancer in total.  
8  
9  
10  
11  
12  
13  
14

### 15 **Practice recruitment**

16 A total of 530 primary care practices across England will be recruited, supported by the NIHR Clinical  
17 Research Network (CRN) and strategic media releases to raise awareness of the trial. Practices that  
18 are proposing a split or a merger are not eligible for the trial, as the practices before or after the  
19 change may have been allocated to different arms in the trial. A method for identifying and managing  
20 unanticipated splits or mergers during the active phase of the trial is shown in Appendix B.  
21  
22  
23  
24  
25

26 Patients are not being recruited into this trial - patient consent is not being sought for the use of the  
27 eRATs during the consultation. This is because ERATs are essentially an extension and enhancement  
28 of existing diagnostic tools already available to the GP to support their clinical decision making. Other  
29 randomised controlled trials of interventions in primary care have taken this approach,(34) including  
30 the feasibility trial of the oesophago-gastric eRAT.(14, 35, 36) To promote patient awareness of the  
31 practice's participation in the ERICA trial, including requesting practices to add it to their websites and  
32 any social media feed. A selection of patients will be recruited to the nested process evaluation and  
33 health economics studies (see below and Appendices B and D).  
34  
35  
36  
37  
38  
39  
40

### 41 **Randomisation**

42 Practices will be randomised using a 1:1 ratio into one of two trial arms: usual diagnostic care (control)  
43 and usual diagnostic practice plus access to the suite of eRATs, as the intervention. Randomisation  
44 will be computer-generated and web-based, conducted by an independent member of staff at the  
45 Exeter Clinical Trials Unit (ExeCTU), overseen by the CTU statistician (not the trial statistician). To  
46 promote balance between the trial arms in practices' use of the 2-week wait system, and therefore  
47 propensity to refer to secondary care, we will minimise randomisation by age-sex standardised 2-week  
48 wait referral ratio (the best available proxy) in national tertiles. We will use simple randomisation to  
49 allocate the first 50 practices (~10% of the total target), and then apply minimisation by 2-week wait  
50 referral ratio tertile, taking into account the previous allocations to inform the minimisation algorithm.  
51 All allocations using the minimisation algorithm will retain a stochastic element, aimed at promoting  
52 allocation concealment.  
53  
54  
55  
56  
57  
58  
59  
60

1  
2 The data analysis will be carried out by the trial statistician and health-economist, blinded to  
3 treatment allocation and all primary outcome data are objective assessments of clinical outcome.  
4 Staging (the primary outcome) will be performed by pathologists unaware of trial participation or  
5 allocation. However, given the nature of the intervention, it is not possible to blind GPs or the GP  
6 practice to treatment allocation.  
7  
8  
9

## 10 11 12 13 **Outcome measures**

### 14 15 **Primary outcome**

16 Outcome measures will be captured at patient-level, using data routinely collected by the National  
17 Cancer Registration and Analysis Service (NCRAS). The primary outcome is whether a patient is  
18 diagnosed at stage 1 or 2 (early) or stage 3 or 4 (advanced). This division of staging is commonly used  
19 and is a targeted metric in the 2019 NHS Long Term Plan - for stage 1 and 2 cancers (for all staged  
20 cancers other than non-melanoma skin cancer) at diagnosis to comprise 75% of the total by 2028. The  
21 current UK overall incidence-weighted percentage of early stage at diagnosis was 55% in 2018, though  
22 for the six eRAT cancers, it is 35%.(37)  
23  
24  
25  
26  
27  
28  
29  
30

### 31 32 **Secondary outcomes**

33 A range of secondary outcomes will be examined:

- 34  
35 1. The binary stage at diagnosis of a further six cancers without eRATs will be identified from  
36 NCRAS, and compared between intervention and control practices. This is to investigate the  
37 possibility of a 'spill-over' effect whereby eRATs are associated with increased diagnostic  
38 activity beyond the eRAT cancers.  
39
- 40  
41 2. The practice's number of patients diagnosed with the six eRAT cancers combined, and the  
42 total number of cancer cases, from NCRAS.  
43
- 44  
45 3. The number of patients investigated or referred under the 2-week wait system for the six eRAT  
46 cancers combined, and in total, from Cancer Waiting Times data.  
47
- 48  
49 4. Route to diagnosis from the Routes to Diagnosis Dataset,(18) which uses Hospital Episode  
50 Statistics data. This will be categorised into four possible routes: emergency attendance, 2-  
51 week wait referral, GP referral, and "other". We will collect this information for each of the  
52 six eRAT cancers, and for the six comparator non-eRAT cancers.  
53
- 54  
55 5. 2-week wait performance measures, from Cancer Waiting Times data, for the six eRAT cancers  
56 combined, and for all cancer referrals:  
57  
58  
59  
60

1  
2  
3  
4  
5  
6  
7  
8  
9  
10  
11  
12  
13  
14  
15  
16  
17  
18  
19  
20  
21  
22  
23  
24  
25  
26  
27  
28  
29  
30  
31  
32  
33  
34  
35  
36  
37  
38  
39  
40  
41  
42  
43  
44  
45  
46  
47  
48  
49  
50  
51  
52  
53  
54  
55  
56  
57  
58  
59  
60

5.1 Whether a patient on a 2-week wait pathway received a diagnosis of cancer. When aggregated, for example at the practice-level, and expressed as the proportion of patients who received a cancer diagnosis, this is known as the conversion rate.

5.2 The duration between 2-week wait referral and diagnosis of cancer in days

5.3 Whether patients referred on a 2-week wait referral and who received a cancer diagnosis were diagnosed within 28 days, the Faster Diagnosis Standard (introduced in 2022).

5.4 Detection rate – the proportion of a practice’s cancers which are identified via the 2-week wait pathway.

6. Survival measures (from date of diagnosis): 30-day; 1-year (identified from NCRAS). 5-year survival will also be reported, but the main trial will report on 30 day and 1-year, with 5-year data being a subsidiary report. These outcomes will use all-cause mortality data from the Office for National Statistics.

7. Adverse events (using data from the Diagnostic Imaging Dataset): these are expected to be few, and largely related to complications from hospital investigation such as colonoscopy. There is no mechanism for adverse events to be collected using routine data. We will, however, estimate any change in the expected number of adverse events from imaging investigations (colonoscopies, sigmoidoscopies, upper gastro-intestinal endoscopies, chest x-rays, abdominal ultrasounds, and abdominal CT scans) through investigating any change in the rate of these investigations in intervention practices relative to control practices (see data analysis section). Potential adverse psychological consequences of being labelled with ‘possible cancer’ will be further explored in the process evaluation.

## Data collection

All primary and secondary outcome measures are available from NCRAS, DID and publicly available practice level data, including Cancer Waiting Times data. We will be using depersonalised (pseudo-anonymised) data. The Public Health England Office for Data Release (ODR) guidelines indicated that no legal gateway (e.g., section 251 approval) will be necessary to obtain these data.

## Data analysis

All analyses will follow CONSORT guidelines for cluster-randomised and pragmatic trials. The primary analysis, exploring the proportion of cancer patients with early stage at diagnosis, will use mixed-



1 effects logistic regression with a random intercept for practice to accommodate the hierarchical  
2 nature of the data (i.e. random allocation by practice, with participants nested within practice). This  
3 regression will include trial-arm at practice-level, and will adjust for patient-level covariates known to  
4 be associated with stage (age, sex, quintile of the income domain from the Index of Multiple  
5 Deprivation (IMD), and cancer site),(38) and the practice-level minimisation variable (national tertile  
6 of age-sex standardised two-week wait referral ratio). We will further adjust the model at the practice-  
7 level for list size, clinical IT system used, and Care Quality Commission (CQC) overall rating, should  
8 these variables be associated with stage in preliminary analyses (even if not unbalanced with respect  
9 to trial allocation). Trial arm and covariates will all be entered as fixed effects. The degree of change  
10 in the percentage of patients diagnosed at a late stage in intervention practices will be investigated  
11 by exploring the marginal distributions of trial arm on the probabilities predicted by these models.  
12  
13  
14  
15  
16  
17  
18  
19

20 For the secondary outcome of the stage at diagnosis of six cancers without eRATs, we will repeat the  
21 above model including data on the six non-eRAT cancers as well as the six eRAT cancers. This model  
22 will use all the variables described above, plus an indicator variable for whether the cancer site has an  
23 eRAT and an interaction term between this variable and trial arm. From this model, we will obtain  
24 odds ratios (with 95% CIs) for: (i) the “spill over” effect of having the intervention on cancer sites not  
25 included in the intervention, and (ii) for the relative effect of the intervention on stage for included  
26 cancer sites compared with those not included in the intervention.  
27  
28  
29  
30  
31  
32  
33

34 Mixed-effects logistic regression models with a random intercept for practice will also be fitted for the  
35 other secondary binary outcomes; route to diagnosis, conversion rate, and timeliness. These models  
36 will include trial arm as a practice-level effect, and will adjust at the patient-level for age, sex, and  
37 quintile of the Index of Multiple Deprivation (IMD) income domain, and at the practice-level for the  
38 minimisation variable (national tertile of age-sex standardised two-week wait referral ratio). These  
39 analyses will also adjust at the patient-level for cancer site (routes to diagnosis analyses) or for referral  
40 type (2-week wait analyses) as appropriate. The models will be further adjusted as in the main  
41 outcome variable analysis.  
42  
43  
44  
45  
46  
47  
48

49 Time-to-event secondary outcomes (length of waiting time, survival) will be analysed using mixed-  
50 effects parametric survival models with a random intercept for practice, and all other variables added  
51 as fixed effects. These models will include trial-arm as a practice-level effect, and will adjust for the  
52 same patient-level factors as described above (waiting times adjusted for referral pathway rather than  
53 cancer site as above), and the practice-level minimisation variable (national tertile of age-sex  
54 standardised 2-week wait referral ratio). The models will also use the same adjustment as the primary  
55  
56  
57  
58  
59  
60

1 outcome measure. An appropriate distribution to model the baseline hazard will be utilised, as  
2 determined by a comparison of the Akaike Information Criteria under different distributions.(39)  
3  
4

5 For rate outcomes (number of 2-week wait referrals, cancers, and imaging investigations), we will  
6 analyse the rates per 100,000 registered patients per year by age-sex strata using mixed-effects  
7 Poisson regression models including a random intercept for practice. These models will include trial-  
8 arm as a predictor and will adjust for the age and sex of the strata, and at the practice-level for the  
9 minimisation variable (2-week wait referral ratio) and deprivation (quintile of IMD overall score). The  
10 models will be further adjusted at the practice-level for list size, clinical IT system used, CQC overall  
11 rating, and for the age and sex case-mix of practices should these covariates be found to be associated  
12 with the outcome (even if not unbalanced with respect to allocation). Case-mix will be incorporated  
13 by including variables for counts of practice populations in different age-sex strata (5-year age groups  
14 by sex, excluding one age group-sex stratum that can be determined once all others are known).  
15  
16  
17  
18  
19  
20  
21  
22

23 All the above analyses will combine data for the six eRAT cancers for each model. For outcomes  
24 related to two-week wait referrals, data will be combined for all referral pathways relevant to the six  
25 eRAT cancers. To investigate whether the eRATs produce a “spill-over” effect, whereby diagnostic  
26 activity is increased for other cancers, we will repeat all analyses using data for the six non-eRAT  
27 cancers combined for each model. Investigation of a spill-over effect for 2-week wait referral  
28 outcomes will use data for all referral pathways combined.  
29  
30  
31  
32  
33

34 Additional sensitivity analyses will be conducted for the primary outcome in order to explore  
35 moderation arising from practice-level characteristics, using interaction terms. Although the trial has  
36 not been powered to detect low to moderate subgroup differences, such as differences in a single  
37 cancer site, large interaction effects that differ with respect to the direction of effect across subgroups  
38 are of interest. The potential impact of missing staging data on the primary outcome will also be  
39 explored through use of multiple imputation methods making use of auxiliary variables such as  
40 survival time, morphology and grade to improve the Missing At Random (MAR) assumption in line  
41 with previous work).(40)  
42  
43  
44  
45  
46  
47  
48  
49

### 50 **Data management**

51 Cancer registry data (NCRAS) will be managed and prepared by the registry themselves and  
52 securely, electronically transferred to the study team. There will be no patient identifiable data within  
53 these datasets. Data from NCRAS will be stored on the Secure Data Resource Hub at the University of  
54 Exeter (which meets requirements for secure storage of sensitive data) and linked to existing practice  
55  
56  
57  
58  
59  
60

1 data held within ExeCTU's REDCap database. The data will be stored and retained in accordance with  
2 registry policies.  
3

4 The nested studies rely on identifying patients from in-practice usage reports. These reports contain  
5 depersonalised (pseudo-anonymised) data. The practice will send a copy to the trial team with the  
6 original practice ID number removed. The local at practice reports will be securely and electronically  
7 transferred to a secure Exeter CTU computer.  
8  
9

10  
11  
12  
13 In the recruitment of patients (and NHS staff) for interviews, questionnaires, or permission for access  
14 to medical notes, participant details will be passed securely between NHS services and the research  
15 team. All participants agreeing to interview, to complete a questionnaire, and/or medical notes  
16 review, and all GPs agreeing to interview will be allocated a unique study ID, and the information  
17 linking their ID to their personal details will be kept securely at the University of Exeter. All other  
18 participant-related paper records will be anonymised and stored separately from the personal  
19 information. The electronic database for the trial will be stored on the secure servers of the University  
20 of Exeter with password-controlled access provided for the research team by ExeCTU. Single data  
21 entry with extensive in-built validity checks will be used to reduce the risk of transcription errors.  
22  
23  
24  
25  
26  
27  
28

29  
30 Audio recordings will be digitised, encrypted and stored on the University's secure server. Audio  
31 recordings will be retained until after anonymised transcripts have been finalised and analysed. At this  
32 stage they will be securely and permanently deleted. Access to personal data will be restricted to the  
33 research team. Names and participant details will not be passed to any third parties and no named  
34 individuals will be included in the outputs. All participants (patients, NHS staff) will be asked for their  
35 consent for the study team to retain interview transcripts for the purposes of future research by those  
36 involved directly in the study team or to be used for educational purposes.  
37  
38  
39  
40  
41  
42

43 Informatica Systems Ltd has developed a separate agreement ('Data processing deed') for  
44 intervention practices which will be used between the GP practices and Informatica Systems Ltd. The  
45 deed was necessary because the development of Skyline has impacted on the processing  
46 arrangements for the eRATs software that is used. The ERICA research study will still use  
47 the Organisation Information Document which outlines the research team's data processing  
48 requirements, to be signed between the practice and Sponsor.  
49  
50  
51  
52  
53

54  
55 All study data will be kept for 10 years (unless data registry policy requires otherwise) under secure  
56 conditions on University of Exeter secure servers. Data will also be subject to standard secure storage  
57 and usage policies.  
58  
59  
60

## **Trial monitoring and management**

### ***Trial Sponsor and Funders***

The University of Exeter is the trial sponsor. The trial funders are providing finance to run the trial. None of the funders or sponsor will be involved in the design or day-to-day conduct of the trial, analysis of data, or interpretation of findings.

### ***Trial Steering Committee (with Data Monitoring Committee responsibilities)***

The responsibilities of the Trial Steering Committee (TSC) will be to review the main study protocol and any amendments, monitor and supervise the trial towards its interim and overall objectives, review relevant information from other sources, and to help resolve problems brought by the Trial Management group (TMG). The TSC will therefore provide overall independent supervision for ERICA on behalf of the funders and the Sponsor. Meetings will be held at regular intervals determined by need and not less than twice a year. Routine business will be conducted by telephone, videoconference, and email. The TSC will also operate as a Data Monitoring Committee with responsibility to monitor the overall conduct of the trial. There will be a time lag between practices 'entering the trial' and data availability from cancer registries. The time lag will be such that data will only be available once practices have completed data collection. Therefore, interim analyses to assess whether the trial was effective, and to support a decision whether to stop the trial early, would be unnecessary as data collection (and practice participation) would have already ceased.

### ***Trial Management Group***

A TMG has been established and includes those responsible for the day-to-day management of the trial and those supporting the delivery of the trial and associated stakeholders, including representatives of the Local Clinical Research Networks (LCRN) and Macmillan. The group will monitor all aspects of the conduct and progress of the trial, ensure that the protocol is adhered to and take appropriate action to safeguard participants and the quality of the trial itself. The group will meet regularly (monthly in the first instance, until recruitment has completed) in person and/or by phone or over the internet (via MS Teams).

### ***Core Study Team***

The core study team (Chief investigator, Trial Manager (TM)) will meet weekly during the study. Day-to-day running of the trial will be the responsibility of the TM. The TM will have access to the ExeCTU suite of standard operating procedures (SOPs) and will ensure that the trial is run in compliance with

1 all relevant SOPs (e.g., assessment, processes and reporting, data management, study staff health and  
2 safety).

### 7 ***Nested Studies***

#### 9 **Health Economics**

11 We will estimate the cost and cost-effectiveness of the eRATs versus usual diagnostic practice using  
12 the primary perspective of the NHS and Personal Social Services (i.e. third-party payer). We will  
13 estimate the cost-effectiveness of the intervention based upon the primary outcome and secondary  
14 survival outcomes (30-day and 1-year; 5-year survival will be a subsidiary report) for the six cancer  
15 sites with eRATs and report the results using the latest guidelines.(41) colorectal, lung and ovarian  
16 cancers we will use decision analytic models to combine data from the within-trial analysis of ERICA  
17 intervention on costs and benefits, with longer estimates derived from the evidence synthesis of the  
18 costs and benefits of stage of diagnosis and disease progression to estimate the cost per Quality  
19 Adjusted Life Year (QALY) over the longer term.(42) For fuller details see Appendix C.

#### 27 **Service Delivery Modelling**

29 This will investigate the key factors central to the (re) organisation of NHS diagnostic services for  
30 cancer referrals. We will use a range of methods, both quantitative and qualitative, to analyse service  
31 delivery alternatives. Specifically, we will aim to use modelling approaches to explore the likely  
32 implications of different scenarios across dimensions of performance, outcomes and costs. Fuller  
33 details are in Appendix D.

#### 39 **Process Evaluation**

41 The process evaluation work aims to identify and investigate the contextual factors that impact upon  
42 the effectiveness of the eRATs with a particular focus on intervention fidelity and GP engagement. The  
43 impact of the eRATs on the patients' experience of their GP consultation and their experiences of  
44 subsequent care will also be explored. Fuller details are in Appendix E.

#### 51 **GP Workload**

53 This nested study aims to explore, in terms of consultation time, the impact of GPs using eRATs on GP  
54 workload and patient 'flow' through consulting sessions. It will also explore workload in the week  
55 following the index consultation in which an eRAT was activated. Fuller details are in Appendix F.

## Patient and Public Involvement and Engagement

Our Patient and Public Involvement and Engagement (PPIE) group, including cancer survivors, have been consulted widely during the development of this study. The PPIE group have reviewed and commented on the protocol and supported the development of all patient-facing materials including information sheets and study lay summaries. One experienced PPIE representative sits on the TMG and another is on the TSC. A total of seven people have joined our PPIE group for this study and will contribute by reviewing study materials and documentation, commenting upon and proof reading reports and contributing to dissemination activities. This group will be supported in their work by the South West Peninsula Applied Research Collaboration (PenARC) PPIE team, for example by attending workshops on critical appraisal skills. All PPIE representatives will be recompensed for their time given to the study.

## Ethics and Dissemination

A trial publication policy will be developed which outlines the plan for dissemination and will be in accordance with the International Committee of Medical Journal Editors. The results of the trial will be reported first to study collaborators and to the funder. The main report will be drafted by the TMG and circulated to all collaborators and the TSC for comment.

Access to the final trial datasets will be made publicly available unless contractual agreements between data providers limit such access.

## Ethical review

The trial has received favourable Ethical review from London City & East Research Ethics committee, reference number 19/LO/0615, with eight amendments between then and 2022, relating to three main areas: the delays caused by the COVID-19 pandemic, with its recruitment moratorium; an alteration in the mechanism by which the eRATs software were delivered; and the inclusion of a nested study focussing on the impact of eRATs on GP workload. Current protocol version – V 6.0, 8<sup>th</sup> August, 2022.

**Author contributions:** WH conceived of the trial. Substantial contributions to the design of the methods and research processes were made by WH, JC, LM, SD, GA, MP, AS, AML, FW, EF, ES, MS, AM and RC. The protocol was written by RC, LM, SD, GA, AS, EF, and MP under the overall editorial control of WH. All authors critically reviewed the protocol and provided approval of the final version.

**Funding statement:** This research is funded by a philanthropic donation by The Dennis and Mireille Gillings Foundation, Cancer Research UK (C8640/A23385), plus support from Macmillan in provision

1 of staff time, and the University of Exeter. The trial is registered with ISRCTN: (trial no:  
2 ISRCTN22560297) and on the CRUK trial registry (CRUK database no: 16163).  
3  
4

5 **Acknowledgements:** We would like to thank the NIHR Clinical Research Network for their support  
6 with recruitment, Macmillan for their contributions to the early eRAT work and ongoing support with  
7 practice recruitment and pilot testing. SD's time is partially supported by the National Institute of  
8 Health Research Applied Research Collaboration (ARC) South-West Peninsula.  
9

10  
11 **Disclaimer:** The views expressed are those of the authors and not necessarily those of the NHS, the  
12 NIHR or Department of Health.  
13  
14  
15  
16  
17

18  
19 **Competing interests statement:** WH has intellectual property rights to the original RATs, though has  
20 never sought to commercialize these. All other authors: no competing interests to declare.  
21  
22  
23  
24  
25  
26  
27  
28  
29  
30  
31  
32  
33  
34  
35  
36  
37  
38  
39  
40  
41  
42  
43  
44  
45  
46  
47  
48  
49  
50  
51  
52  
53  
54  
55  
56  
57  
58  
59  
60

## References

1. Richards MA. The size of the prize for earlier diagnosis of cancer in England. *Br J Cancer*. 2009;101.
2. Richards M, Thorlby R, Fisher R, Turton C. Unfinished business: An assessment of the national approach to improving cancer services in England 1995–2015. London; 2018.
3. NHS England. (2019) The NHS Long Term Plan [Available from: <https://www.longtermplan.nhs.uk/>].
4. de Koning HJ, van der Aalst CM, de Jong PA, Scholten ET, Nackaerts K, Heuvelmans MA, et al. Reduced Lung-Cancer Mortality with Volume CT Screening in a Randomized Trial. *New England Journal of Medicine*. 2020;382(6):503-13.
5. Richards M. THE INDEPENDENT REVIEW OF ADULT SCREENING PROGRAMMES. NHS England; 2019. Contract No.: 01089.
6. Landy R, Pesola F, Castanon A, Sasieni P. Impact of cervical screening on cervical cancer mortality: estimation using stage-specific results from a nested case-control study. *Br J Cancer*. 2016;115(9):1140-6.
7. Abel GA, Mendonca SC, McPhail S, Zhou Y, Elliss-Brookes L, Lyratzopoulos G. Emergency diagnosis of cancer and previous general practice consultations: insights from linked patient survey data. *British Journal of General Practice*. 2017.
8. Hamilton W, Walter FM, Rubin G, Neal RD. Improving early diagnosis of symptomatic cancer. *Nature Reviews Clinical Oncology*. 2016;13:740.
9. Hamilton W, Peters TJ, Round A, Sharp D. What are the clinical features of lung cancer before the diagnosis is made? A population based case-control study. *Thorax*. 2005;60(12):1059-65.
10. NICE. Suspected cancer: recognition and referral [NG12] 2015 [Available from: <https://www.nice.org.uk/guidance/ng12>].
11. Hamilton W, Green T, Martins T, Elliott K, Rubin G, Macleod U. Evaluation of risk assessment tools for suspected cancer in general practice: a cohort study. *British Journal of General Practice*. 2013;63(606):e30-e6.
12. Price S, Spencer A, Medina-Lara A, Hamilton W. Availability and use of cancer decision-support tools: a cross-sectional survey of UK primary care. *British Journal of General Practice*. 2019;69(684):e437.
13. Medina-Lara A, Grigore B, Lewis R, Peters J, Price S, Landa P, et al. Cancer diagnostic tools to aid decision-making in primary care: mixed-methods systematic reviews and cost-effectiveness analysis. *Health technology assessment (Winchester, England)*. 2020;24:66.
14. Rubin G, Walter FM, Emery J, Hamilton W, Hoare Z, Howse J, et al. Electronic clinical decision support tool for assessing stomach symptoms in primary care (ECASS): a feasibility study. *BMJ Open*. 2021;11(3):e041795.
15. Kostopoulou O, Arora K, Pálfi B. Using cancer risk algorithms to improve risk estimates and referral decisions. *Communications Medicine*. 2022;2(1):2.
16. Hamilton W. Diagnosing symptomatic cancer in the NHS. *BMJ : British Medical Journal*. 2015;351:h5311.
17. Møller H, Gildea C, Meechan D, Rubin G, Round T, Vedsted P. Use of the English urgent referral pathway for suspected cancer and mortality in patients with cancer: cohort study. *BMJ*. 2015;351.
18. Elliss-Brookes L, McPhail S, Ives A, Greenslade M, Shelton J, Hiom S. Routes to diagnosis for cancer - determining the patient journey using multiple routine data sets. *Br J Cancer*. 2012;107.
19. Hamilton W. The CAPER studies: five case-control studies aimed at identifying and quantifying the risk of cancer in symptomatic primary care patients. *Br J Cancer*. 2009;101 Suppl 2:S80-6.
20. Hamilton W, Peters TJ, Bankhead C, Sharp D. Risk of ovarian cancer in women with symptoms in primary care: population based case-control study. *BMJ*. 2009;339:b2998.



21. Hamilton W, Round A, Sharp D, Peters TJ. Clinical features of colorectal cancer before diagnosis: a population-based case-control study. *Br J Cancer*. 2005;93(4):399-405.
22. Shephard E, Neal R, Rose P, Walter F, Hamilton WT. Clinical features of kidney cancer in primary care: a case-control study using primary care records. *The British journal of general practice : the journal of the Royal College of General Practitioners*. 2013;63(609):e250-5.
23. Shephard EA, Stapley S, Neal RD, Rose P, Walter FM, Hamilton WT. Clinical features of bladder cancer in primary care. *The British journal of general practice : the journal of the Royal College of General Practitioners*. 2012;62(602):e598-604.
24. Stapley S, Peters TJ, Neal RD, Rose PW, Walter FM, Hamilton W. The risk of oesophago-gastric cancer in symptomatic patients in primary care: a large case-control study using electronic records. *Br J Cancer*. 2013;108(1):25-31.
25. NICE. Suspected cancer: recognition and referral [NG12]2015. Available from: <http://www.nice.org.uk/guidance/NG12>.
26. Macmillan. (2015) Rapid referral guidelines [available at: [https://www.macmillan.org.uk/\\_images/rapid-referral-toolkit-desktop\\_tcm9-291864.pdf](https://www.macmillan.org.uk/_images/rapid-referral-toolkit-desktop_tcm9-291864.pdf)].
27. Cancer Research UK. (2017) Cancer Stats 2017 [Available from: <http://www.cancerresearchuk.org/health-professional/cancer-statistics>].
28. Collins GS, Altman DG. Identifying patients with undetected gastro-oesophageal cancer in primary care: External validation of Qcancer(R) (Gastro-Oesophageal). *European journal of cancer (Oxford, England : 1990)*. 2013;49(5):1040-8.
29. Hamilton W, Stapley S, Campbell C, Lyratzopoulos G, Rubin G, Neal R. For which cancers might patients benefit most from expedited symptomatic diagnosis? Construction of a ranking order by a modified Delphi technique. *BMC Cancer*. 2015;15:820.
30. McPhail S, Johnson S, Greenberg D, Peake M, Rous B. Stage at diagnosis and early mortality from cancer in England. *Br J Cancer*. 2015;112(s1):S108-S15.
31. Shephard EA, Neal RD, Rose PW, Walter FM, Hamilton W. Symptoms of adult chronic and acute leukaemia before diagnosis: large primary care case-control studies using electronic records. *British Journal of General Practice*. 2016;66(644):e182-e8.
32. UK CR. Statistics by Cancer Type 2022 [Available from: <https://www.cancerresearchuk.org/health-professional/cancer-statistics/statistics-by-cancer-type>].
33. Barclay ME, Lyratzopoulos G, Greenberg DC, Abel GA. Missing data and chance variation in public reporting of cancer stage at diagnosis: Cross-sectional analysis of population-based data in England. *Cancer Epidemiology*. 2018;52:28-42.
34. Campbell JL, Fletcher E, Britten N, Green C, Holt TA, Lattimer V, et al. Telephone triage for management of same-day consultation requests in general practice (the ESTEEM trial): a cluster-randomised controlled trial and cost-consequence analysis. *The Lancet*. 2014;384(9957):1859-68.
35. Downs M, Turner S, Bryans M, Wilcock J, Keady J, Levin E, et al. Effectiveness of educational interventions in improving detection and management of dementia in primary care: cluster randomised controlled study. *BMJ*. 2006;332(7543):692.
36. Flottorp S, Oxman AD, Håvelsrud K, Treweek S, Herrin J. Cluster randomised controlled trial of tailored interventions to improve the management of urinary tract infections in women and sore throat. *Bmj*. 2002;325(7360):367.
37. National Disease Registration Service:. Case-mix adjusted percentage of cancers diagnosed at stages 1 and 2 in England, by Clinical Commissioning Group2020 25 Jan 2022. Available from: <https://www.gov.uk/government/statistics/case-mix-adjusted-percentage-cancers-diagnosed-at-stages-1-and-2-by-ccg-in-england/national-disease-registration-service-case-mix-adjusted-percentage-of-cancers-diagnosed-at-stages-1-and-2-in-england-by-clinical-commissioning-group>.
38. Lyratzopoulos G, Abel GA, Brown CH, Rous BA, Vernon SA, Roland M, et al. Socio-demographic inequalities in stage of cancer diagnosis: evidence from patients with female breast, lung, colon, rectal, prostate, renal, bladder, melanoma, ovarian and endometrial cancer. *Annals of Oncology*. 2012;24(3):843-50.
39. Bozdogan H. Model selection and Akaike's Information Criterion (AIC): The general theory and its analytical extensions. *Psychometrika*. 1987;52(3):345-70.

- 1  
2  
3  
4  
5  
6  
7  
8  
9  
10  
11  
12  
13  
14  
15  
16  
17  
18  
19  
20  
21  
22  
23  
24  
25  
26  
27  
28  
29  
30  
31  
32  
33  
34  
35  
36  
37  
38  
39  
40  
41  
42  
43  
44  
45  
46  
47  
48  
49  
50  
51  
52  
53  
54  
55  
56  
57  
58  
59  
60
40. Lyratzopoulos G, Abel GA, Brown CH, Rous BA, Vernon SA, Roland M, et al. Socio-demographic inequalities in stage of cancer diagnosis: evidence from patients with female breast, lung, colon, rectal, prostate, renal, bladder, melanoma, ovarian and endometrial cancer. *Ann Oncol*. 2013;24(3):843-50.
41. Husereau D, Drummond M, Augustovski F, de Bekker-Grob E, Briggs AH, Carswell C, et al. Consolidated Health Economic Evaluation Reporting Standards 2022 (CHEERS 2022) statement: updated reporting guidance for health economic evaluations. *BMJ*. 2022;376:e067975.
42. Weinstein MC, O'Brien B, Hornberger J, Jackson J, Johannesson M, McCabe C, et al. Principles of Good Practice for Decision Analytic Modeling in Health-Care Evaluation: Report of the ISPOR Task Force on Good Research Practices—Modeling Studies. *Value in Health*. 2003;6(1):9-17.

For peer review only

1  
2  
3  
4  
5  
6  
7  
8  
9  
10 **A pragmatic cluster randomised controlled trial assessing the clinical effectiveness and cost-**  
11 **effectiveness of electronic risk-assessment for cancer for patients in general practice (ERICA):**  
12

13 **Appendices**  
14  
15  
16  
17  
18  
19  
20  
21  
22  
23  
24  
25  
26  
27  
28  
29  
30  
31  
32  
33  
34  
35  
36  
37  
38  
39  
40  
41  
42  
43  
44  
45  
46  
47  
48  
49  
50  
51  
52  
53  
54  
55  
56  
57  
58  
59  
60

For peer review only

**Appendix A.** A simplified schema illustrating the pathways to a cancer diagnosis in the UK. The size of the arrow reflects the approximate proportion of cancers taking each route. The yellow central arrow represents where eRATs are expected to have an effect.

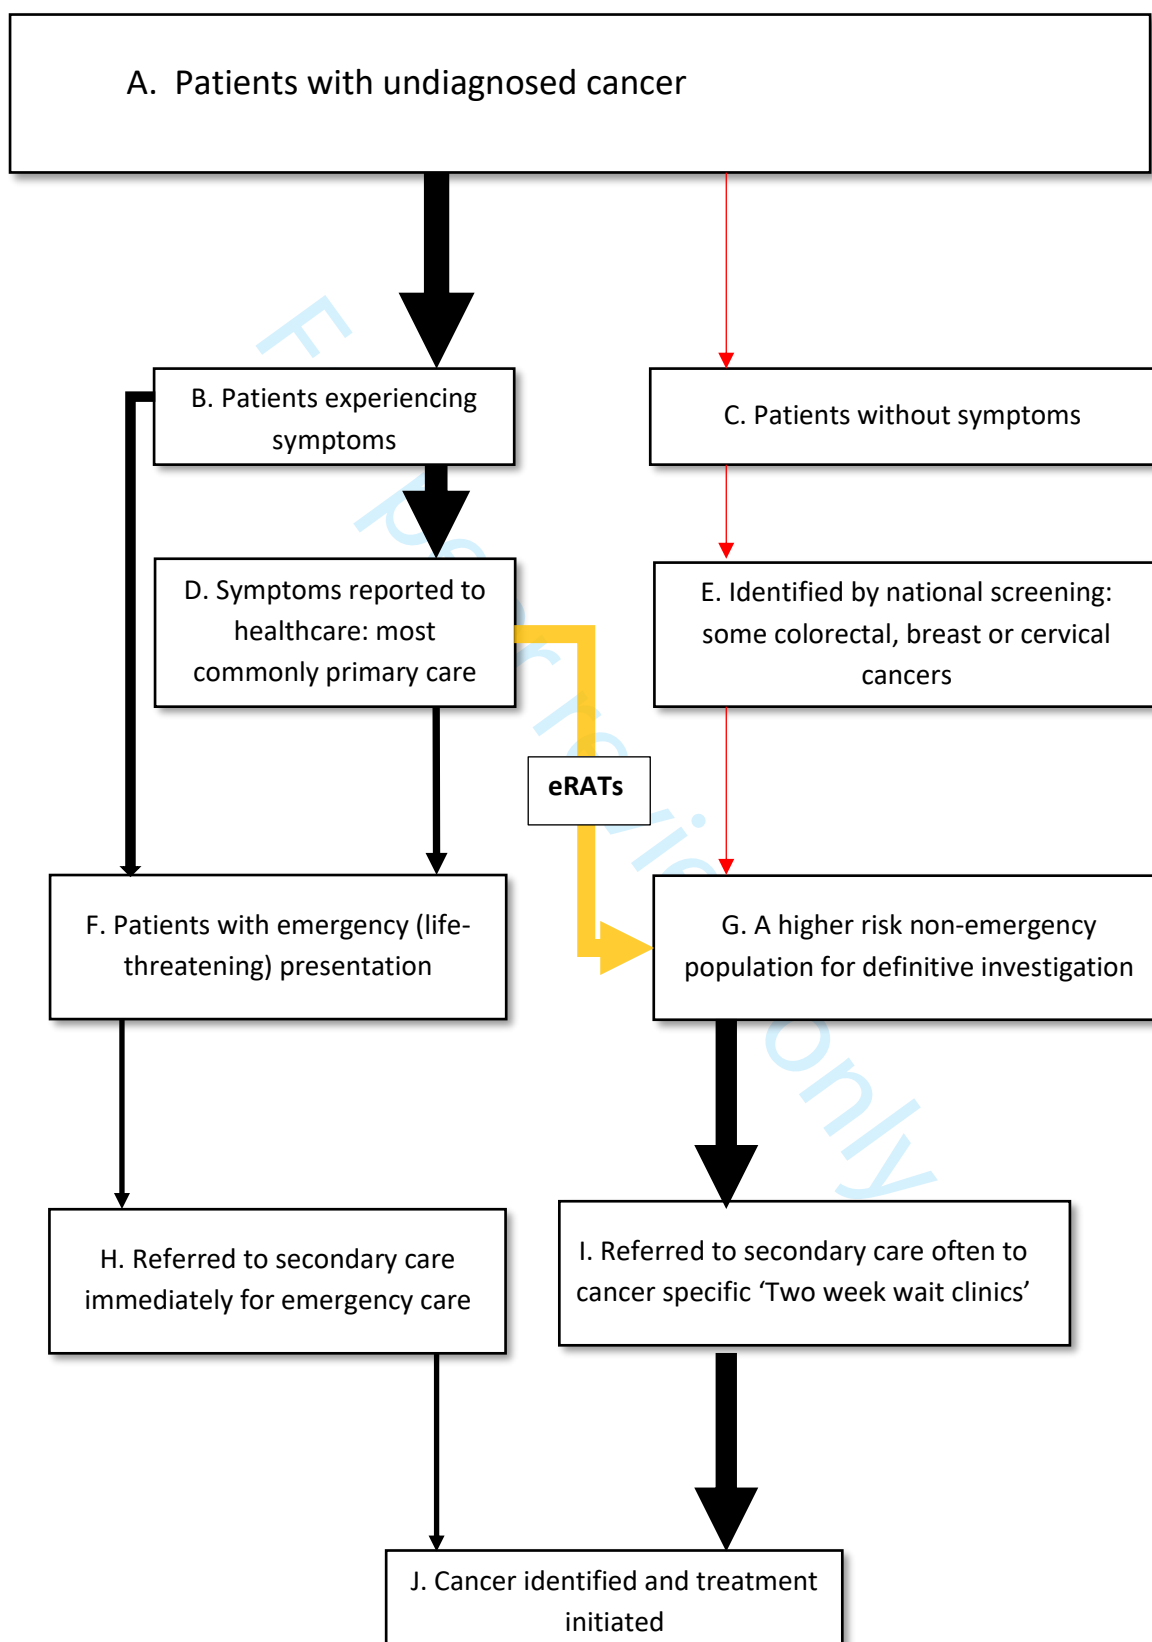

### ***Appendix B. Managing practice splits and mergers in analyses***

Although we will exclude practices that report imminent restructuring during recruitment, there may be unforeseen mergers or splits of practices. Where mergers and splits are concerned, this could mean, for example, that some of our practices who were in the control arm may merge with an intervention practice. Similarly, a non-trial practice may become part of a trial practice (intervention or control). Changes in practice size have implications on the denominator – the number of patients that each practice is likely to be contributing to our sample – and is a particular issue for three of our secondary outcome measures based on rates (cancer diagnosis rate, two-week wait referral rate, and adverse event rate). Importantly, however, this issue is not a problem for our primary outcome of staging.

We define a split and mergers as follows: Split – Where a population of patients registered to a single practice with a single practice code become registered with two or more individual practices with different practice codes. The practice codes of the new practices may be new codes (i.e. did not exist prior to the split) or one may inherit the original practice code (although this is not a requirement). The change in registration of patients must occur to a substantial number of patients and not at their request. Merger – Where a population of patients registered to one or more practices with different practice codes become registered at a single individual practice with a single practice code. The practice code of the new practice may be a new code (i.e., did not exist prior to the split) or it may inherit one of the original practice codes. A federation is not a “merger” in these terms.

Excluding practices who restructure during the trial may unnecessarily reduce our power. Therefore, we will try and accommodate changes in status. The Table outlines our approach. The assumption is that the change takes place at time T. Any practice which splits goes from X to Y and Z, and mergers are Z plus Y becoming X. Intervention practices are I, and comparison practices C.

Practice size fluctuations will be monitored in real time. Practice size data are freely and publicly available from NHS Digital and are updated monthly. Each month during the data collection, the trial statistician will download the practice size data and inspect size for all the practices in the trial (the statistician will remain blinded to outcome allocation). If the practice size differs by more than 10% the statistician will alert the trial manager, who will contact the research champion in the relevant practice to explore the reasons for this practice size change. Reasons (e.g., mergers, splits) will be recorded.

**Table: managing changes in practice size – mergers and splits**

| Split or merger                                                                                                                                                                                                                                                      | X pre change | Y pre change | Z pre change | X post change | Y post                                                                                                 | Z post |
|----------------------------------------------------------------------------------------------------------------------------------------------------------------------------------------------------------------------------------------------------------------------|--------------|--------------|--------------|---------------|--------------------------------------------------------------------------------------------------------|--------|
| <b>Split</b>                                                                                                                                                                                                                                                         | I            |              |              |               | I                                                                                                      | I      |
|                                                                                                                                                                                                                                                                      | C            |              |              |               | C                                                                                                      | C      |
| We will allow the daughter practices to withdraw from the trial if they desire, which would mean we lose Y or Z (or both). If daughter practices decide to withdraw, we will include data up to time T plus 2 months to allow for average diagnostic time to cancer. |              |              |              |               |                                                                                                        |        |
| <b>Merger</b>                                                                                                                                                                                                                                                        |              | I            | I            | I             |                                                                                                        |        |
|                                                                                                                                                                                                                                                                      |              | I            | C            | I             | There is likely to be wash over under these conditions, so the merged practice will be considered as I |        |
|                                                                                                                                                                                                                                                                      |              | I            | Non-trial    | I             |                                                                                                        |        |
|                                                                                                                                                                                                                                                                      |              | C            | Non-trial    | C             |                                                                                                        |        |
|                                                                                                                                                                                                                                                                      |              | C            | C            | C             |                                                                                                        |        |

We will manage changes in practice size at the data analysis stage of the trial. Where changes in list size of more than 10% within a month are seen, data for that practice will not be included in the analysis of rate outcomes from one month prior to the change. There are two exceptions to this; 1) splits where all the daughter practices remain in the trial and we continue to treat them as a single practice for rate analyses, 2) mergers where merged practices are in the same arm of the trial, and we will analyse them as a single practice from the start for rate analyses.

**Appendix C**

**Health Economics**

**Intervention costings.** The resources used in developing the training materials and videos (preparation and IT support) will be collected from the trial manager; nationally applicable unit costs will be applied. Estimates of the extent to which these videos are watched by practice staff will be based on information available from the website platform hosting the videos. Information on the resources use to install the eRATs onto the EMIS and SystemOne practice IT systems will be estimated in consultation with practice champions. These estimates will additionally aim to estimate: 1) the cost of installation in the trial and 2) the anticipated cost of future installation should eRATs be implemented nationally.

1 **Health related quality of life and resource use.** The Health Economics analysis will draw on the  
2  
3 estimated number of imaging investigations (colonoscopies, sigmoidoscopies, upper gastro-intestinal  
4  
5 endoscopies, chest x-rays, abdominal ultrasounds, and abdominal CT scans) using data from the  
6  
7 Diagnostic Imaging Dataset available in the main trial as well as estimates of GP workload from the  
8  
9 process evaluation. Practices will be offered remuneration of nearly £200 for the additional work.

10  
11 To investigate whether the eRATs intervention was associated with a change in health-related quality  
12  
13 of life using the EQ5D-5L and to provide more detailed information on primary care services and tests  
14  
15 used, we will sample patients in the intervention arm who had a consultation where an eRAT alert  
16  
17 occurred, and patients in the control arm who had a consultation where an eRAT alert would have  
18  
19 occurred. We will strategically target practices in both trial arms who have either high, medium, or  
20  
21 low two-week wait referral rates, matching the minimisation criteria in the main trial. It is anticipated  
22  
23 that 15-20 patients per practice over a 2-week period will have a consultation with an eRAT alert. All  
24  
25 patients who have an eRAT alert will be invited to complete a baseline questionnaire and a 3 month  
26  
27 follow-up Health Economics questionnaire, as will equivalent patients in the control arm. We  
28  
29 anticipate that 40% of patients will accept, and of these there will be 20% who do not respond. With  
30  
31 a conservative estimate of a cluster size of five patients responding to the questionnaire, plus using an  
32  
33 minimum clinically important difference of 0.1 for the EQ5D-5L (2) and a standard deviation of 0.23(3),  
34  
35 with an inter-cluster correlation coefficient of 0.03 (4), and an estimated coefficient of variation of  
36  
37 cluster size of 0.7, the sample size required to detect a between group difference with 90% power and  
38  
39 alpha of 0.05 was 28 clusters (140 participants) per arm. Participants who agree to take part will  
40  
41 receive the questionnaire as a hard copy, through the post, or electronically via email, depending on  
42  
43 the participant's preference. Nationally applicable unit costs will be used for all community health and  
44  
45 social care contacts (5) and secondary care services, tests and investigations will be costed using the  
46  
47 National Schedule of Reference Costs 2016-2017. (6)

#### 48 **Decision Analytic Model**

49 The modelling aims to predict the expected impact of a change in stage of diagnosis, and any resulting  
50  
51 change in the distribution of cancer stage at diagnosis (intervention vs. control) over time, building on  
52  
53 the published literature in this area.(7-10) The decision analytic models will not need to separately  
54  
55 model the diagnostic phase, and we will take the trial's primary outcomes, stage at diagnosis (Stage  
56  
57 1-4 separately and not collated into Stage 1-2 and Stage 3-4), to model the longer term effects on  
58  
59 survival, QALYs and secondary care costs.  
60

1 Scenario analysis will be used to examine the impact on the results of multiple parameters changing  
2 simultaneously (based on *a priori* judgement about the combination of parameters to include).(11)  
3 Probabilistic sensitivity analysis will be used to explore the proportion of results that are considered  
4 cost-effective in relation to a given cost-effectiveness threshold and these results will be illustrated  
5 graphically using a cost-effectiveness acceptability curve.(12)  
6  
7  
8  
9

10  
11 The study will follow the CHEERs guidelines for reporting cost-effectiveness studies and models,(13)  
12 and will discount both costs and outcomes at 3.5% as recommended by the National Institute of  
13 Health and Care Excellence.(14) Sensitivity analyses will examine alternative assumptions about the  
14 missing data mechanisms.(15)  
15  
16  
17  
18

### 19 **Service Evaluation**

20 We will draw upon published systematic reviews of Quality of Life measures, that are based on public  
21 preferences and measured in patients (as required by NICE guidelines (16) and that have been used  
22 for economic evaluation modelling studies.(17)  
23  
24  
25  
26

## 27 **Appendix D**

### 28 **Service Delivery Modelling**

#### 29 **Background and rationale**

30 Cancer diagnosis has become one of the principal areas of focus and concern for the NHS in  
31 England.(18) For some time, NHS performance in both early diagnosis, delays in referral, and  
32 associated survival rates has been poor relative to our national aspirations and when compared with  
33 other first world countries. This has worsened during the COVID pandemic. In this context, many of  
34 the issues of concern are centred on key aspects of service delivery. How the NHS organises its services  
35 is often pivotal in determining the cost, feasibility, and effectiveness. For instance, factors such as  
36 workforce availability, prioritisation, service location, scale, and resources are fundamental to the  
37 performance of the NHS in delivering effective cancer services.  
38  
39  
40  
41  
42  
43  
44  
45  
46  
47  
48

49 This component of the ERICA programme will investigate the key factors central to the organisation  
50 of NHS diagnostic services for cancer referrals. We will use a range of methods, both quantitative and  
51 qualitative, to analyse service delivery alternatives. Specifically, we will aim to build an economic  
52 model to assess the likely implications of different scenarios. Implementation of the eRAT diagnostic  
53 tool at primary care level is likely to impact directly on the follow-on pathway for cancer diagnosis (for  
54 example in terms of the volume and case mix of referred patients for diagnosis). Our model will  
55  
56  
57  
58  
59  
60



1 therefore provide an assessment of the likely effect of this impact in terms of costs and performance,  
2 and highlight any changes in organisation that might be implied by the introduction of the eRAT tool.  
3  
4  
5

6 This research will run in parallel with the substantive work conducted for the controlled trial of eRAT  
7 implementation within ERICA. It will also liaise closely with the detailed and standard analysis of cost-  
8 effectiveness for disease progression (which is inherently abstracted from the service delivery aspects  
9 of care) in order to provide an added dimension to the cost-effectiveness outputs from the ERICA  
10 study as a whole.  
11  
12  
13  
14

### 15 *Objectives*

16 To build and populate a model of the cancer diagnostic pathway for England, in order to provide an  
17 assessment of the costs and effectiveness of different scenarios for service delivery. In particular, we  
18 will investigate the potential aspects relative to implementation of eRATs based on the study data  
19 collected from the ERICA trial. In addition, qualitative research with NHS staff in secondary care will  
20 be used to assess key areas central to successful implementation and sustainability.  
21  
22  
23  
24  
25

### 26 *Methods*

27 A wide range of methods will be essential to fulfil the objectives of the work outlined here. Early work  
28 will include a literature search and survey of current systems for diagnostics in cancer. We will  
29 therefore conduct a systematic review of the related literature in the field and carry out a survey of  
30 current service delivery organisation across a range of settings. This work will aim to identify the key  
31 factors bearing on the organisation of services such a regional variation, metropolitan versus rural  
32 context, and population case mix differences.  
33  
34  
35  
36  
37  
38  
39

40 Phase two work will aim to build a model in order to capture the key elements of service delivery for  
41 diagnostic services for cancer. This will explore a range of modelling approaches and test which is most  
42 suited to specific needs. For example, discrete event simulation, Systems Dynamics, geographic  
43 analysis, and Markov modelling will all be tested in terms of their relevance and appropriateness to  
44 specific requirements. In this context it is highly likely that different modelling tools will be relevant to  
45 the diverse needs of the study, so no single approach will be dominant.  
46  
47  
48  
49  
50

51 Phase three will focus on the service delivery implications for the introduction of the eRAT diagnostic  
52 tool in primary care looking particularly at the potential knock-on effects in other areas of service.  
53  
54  
55

56 In addition to our modelling work, we will use qualitative methods, such as problem structuring  
57 methods, soft systems mapping, to provide an assessment of some key elements of implementation.  
58  
59  
60

## Data

A wide range of data will be used to complete this component of the work. We will aim to integrate sources from across routinely collected datasets such as those listed below to construct our models: NHS activity data, Waiting time data, Reference cost data, Diagnostic Imaging Data (DIDs), Hospital Episode Statistics (HES), Workforce reference data, GP and hospital referral data, QOF data, Population data (e.g. ONS). In addition, we will aim to incorporate the primary data derived from the main ERICA study in order to model and assess the pathway impact from the use of eRATs. We will also use the outputs from the standard economic analysis as an input for the cost effectiveness of the service delivery modelling. Output from the qualitative research will also provide important data for informing the outputs of this work, for example in feeding into the recommendations and conclusions of the study.

## Appendix E

### Process Evaluation

#### *Scope of process evaluation*

The process evaluation work aims to identify and investigate the contextual factors that impact upon the effectiveness of the eRATs with a particular focus on intervention fidelity and GP engagement. The impact of the eRATs on the patients' experience of their GP consultation and their experiences of subsequent care will also be explored. It is underpinned by the COM-B framework for understanding behaviour change (19). This framework will outline the interactive nature of how the GP's capability (IT skill for using the eRATs), opportunity (eRAT prompts), and motivation (to do the training and use all the eRAT features) might influence their behaviour – i.e. ongoing use of the eRATs, symptom checker, coding of symptoms and changes to referral letters. We will use a mixed-methods approach to explore how the intervention was delivered (including fidelity and dose - if the eRATs were being used as intended and their degree of use across intervention practices and over time) and GP engagement with and acceptability of using the eRATs (GP's experiences of the eRATs).(20) For delivery, we will be particularly interested in fidelity of function. (21) GPs will be given clear training videos on how to use the eRATs and we will explore the extent to which GPs engaged with training as well as how they subsequently engaged with the software, and the GP's experiences of how it impacted on the GP-patient relationship in order to evaluate how they responded to the intervention.

#### *Methods*

*Intervention fidelity and GP engagement (intervention arm only):* Prior to the start of the intervention GPs require a minimum level of training in how to use the eRATs. Although the software is designed to be intuitive, a clinical system specific walkthrough for the two main functions of the eRATs (prompt and symptom checker) and FAQs will be available via separate videos. The research champion will be

1 given access to the videos and can disseminate the video content to all GPs in the practice (by showing  
2 the videos during a practice meeting, providing a demonstration themselves, or passing on the  
3 weblink). Once practices have started the data collection phase, we will invite up to 10 research  
4 champions to interview to discuss in depth their experiences of the set-up and training procedures  
5 and to explore whether their GPs have the capability, opportunity and motivation to use the eRATs.  
6 We will purposively sample research champions based on whether they are from a practice with a  
7 high, middle or low two-week wait referral rate, which software system their practice uses, their  
8 gender, and their level of experience in practice (10+ years vs. less than 10 years in practice).  
9

10 Detailed eRAT usage can be captured for all IT systems. Usage will be captured in two ways – i) via a  
11 central log and ii) via local ‘at practice’ reports. For i), usage logs will be routinely and automatically  
12 sent from the practice to the Informatica ‘digital warehouse’ and will contain anonymised, practice-  
13 level data for each eRAT including reports of: how many times the prompt was shown, how many  
14 times the symptom checker was used, the number of times the symptoms were changed during use  
15 of the symptom checker, the length of time the symptom checker was open for, and whether clinical  
16 guidance was accessed from the eRAT. These centrally reported logs will be available on a monthly  
17 basis throughout the course of the trial and will be securely sent from Informatica to the research  
18 team who will add the data to the trial database.  
19

20 For ii), usage will be examined via reports run locally at each practice. These reports include individual  
21 patient level data outlining which eRAT was triggered, the patient’s risk score on the eRAT, when the  
22 symptom checker was opened and closed, patient’s age and sex, and a list of possible eRAT symptoms  
23 and whether they were changed. These reports contain depersonalised (pseudo-anonymised) data.  
24 As it is possible to potentially identify the patient via the practice ID number we will ask practices to  
25 make a copy of the report, add in a new patient study ID variable (e.g., p1, p2, p3, etc) and save it to  
26 the practice computer. We will then ask them to send a copy to the trial team with the original practice  
27 ID number removed. They will also send the file with a predetermined practice ID number. These  
28 measures should ensure the data is anonymised. The local at practice reports will be securely and  
29 electronically transferred to a secure Exeter CTU computer.  
30

31 Intervention fidelity (Intervention and control). We will ask all research champions in the intervention  
32 practice to complete a short questionnaire (online via a secure, University approved provider)  
33 detailing their experience of installing software, using the eRATs, and whether alternative risk tools  
34 have also been used. We will ask research champions at control practices their experiences of being  
35 in the trial and whether they have started using any cancer risk tools. The questionnaires will be  
36

1 completed at two time points – i) within 12 months of the start of the intervention; ii) at the end of  
2 the data collection period.  
3  
4

5  
6 For identifying GPs to interview, we will use maximum variation purposive sampling (sampling on  
7 practice two-week wait referral rate (high vs. medium vs. low); software system used, gender, length  
8 of time in practice (10+years vs. < 10 years), and working status (part time vs full time)) and expect to  
9 interview up to 18 GPs from intervention practices to ask them about their experience of the eRATs  
10 including the training provided, any impacts on the consultation and their clinical decision making, as  
11 well as any changes in symptom coding behaviour. We will invite GPs to interview after the  
12 intervention has been running for at least 3 months. Written information will be provided about the  
13 interview study and written consent will be taken prior to the interview and will be verbally confirmed  
14 before the interview commences. Interviews will be audio-recorded and carried out by telephone,  
15 face-to-face (only if it is safe to do so), or over the internet (e.g., Zoom or MS Teams) depending on  
16 the GP's preference, by members of the research team using a pre-defined topic guide that focuses  
17 on their training and capability to use eRATs, their opportunity to use the eRATs over the study period  
18 and their motivation to continue using the system. If a face-to-face interview is chosen (and safe to  
19 perform), interviews will take place in a private room at the practice. The researcher will comply with  
20 the lone worker policy, ensuring that have a 'buddy' within the research team monitoring their  
21 activities and whereabouts. The interviews may raise sensitive issues such as workload and GP  
22 overburden or burnout: the interview study information sheet will provide appropriate sources for  
23 accessing confidential support. GPs will be reminded that they have the right to not answer any  
24 question, stop the interview or withdraw from the interview study; if there is insufficient time to fully  
25 discuss issues GPs will be offered a follow-up time to complete the interview.  
26  
27  
28  
29  
30  
31  
32  
33  
34  
35  
36  
37  
38  
39  
40

41 *GP coding behaviour:* It is possible that the eRATs will impact GP coding behaviour - GP coding  
42 behaviour for cancer specific symptoms may increase; this would cause a minor increase in triggering  
43 of eRATs. We will explore the impact of eRATs on coding behaviour in the interviews (see above) and,  
44 resources permitting, will also examine the impact on coding rates using the following approach. We  
45 will purposively sample 12 intervention practices and 12 control practices in the South/South West of  
46 England based on two-week wait referral rate (i.e., 4 low, 4 moderate, 4 high referring practices) and  
47 which software system is being used. In the first instance we will invite practices who are participating  
48 in the nested study to support this work. If insufficient numbers agree, we will approach other  
49 practices who are not participating in the nested studies. We will explore the rate of coding of the  
50 most frequent symptom for each eRAT cancer in the study that underpins that particular cancer (e.g.  
51 cough, abdominal pain, haematuria)(22-25) for a month in the first three months of entry into ERICA,  
52 and for the same calendar month a year and two years later (as some symptoms have seasonal  
53  
54  
55  
56  
57  
58  
59  
60

1 variation). This will be performed retrospectively, by the search code being given to the research  
2 champion, who will arrange for the search to be conducted in the practice. The results of the search  
3 will be emailed to the research team.  
4  
5

6  
7  
8 *Patient experience of care:* We will adopt a phased, targeted recruitment strategy with an aim to  
9 purposively sample up to (based on two-week rate referral rate (low vs. medium vs. high); gender, age  
10 (40-60 vs. 60+)) 32 patients from the intervention arm. We will approach five practices at a time (and  
11 expect to recruit around 20 practices to reach the target number of participants), to ensure that we  
12 can interview participants in a timely manner.  
13  
14  
15

16  
17  
18 The in-practice eRAT reports are the mechanism by which we will be able to identify individuals to  
19 invite to participate in the activities associated with the process evaluation. The local (at practice)  
20 reporting mechanism will allow the research team to identify individuals for whom the eRATs were  
21 used and thus who are potentially eligible to participate in a semi-structured interview. Purposive  
22 sampling will take place – practices will hold the master eRAT report containing both the patients  
23 practice ID number and the new patient study ID. The research team will let the practice know the  
24 patient study IDs for those whom an invitation letter will be sent. Practices will be offered  
25 remuneration of nearly £200 for the additional work.  
26  
27  
28  
29  
30  
31

32  
33 Via the GP practice, the research team will send out a letter and information booklet to the identified  
34 patients to invite participation in an interview to discuss their experience of care. We will adopt a  
35 longitudinal case study design (26) – patients' care pathways will differ, some will receive referrals  
36 into secondary care for investigations and tests, while some will be on a 'watch and wait' plan,  
37 revisiting their GP at an agreed interval. Some patients will have tests for cancer and the test will  
38 indicate that there is no cancer (false positives) whereas some patients will be diagnosed with cancer.  
39 So that we can fully capture all patient groups at different stages of their care, individuals will be  
40 invited for repeat interviews at regular intervals (i.e., at least one month apart and no more than 3  
41 interviews within 12 months).  
42  
43  
44  
45  
46  
47  
48

49  
50 We aim to perform the first interview within one month of the consultation in which an eRAT was  
51 triggered. Written information about the interview study will have been provided and written  
52 informed consent will be taken prior to all interviews, and will be verbally confirmed before the  
53 interview commences. Interviews will be audio-recorded and carried out by members of the research  
54 team using pre-defined topic guides. The initial interview will be conducted face-to-face at the  
55 participant's home or via video conferencing software such as MS Teams at a time convenient for the  
56 participant, with any subsequent interview conducted either face-to-face, over the phone, or via video  
57  
58  
59  
60

1 conference software, depending upon the participant's preference. We will monitor the progression  
2 of the Covid-19 pandemic and fully adhere to government advice around social distancing and travel.  
3 We will not put the research team or participants at risk and will primarily conduct interviews online.  
4 If it is safe to conduct face-to-face interviews, the researcher will comply with the lone worker policy,  
5 ensuring that have a 'buddy' within the research team monitoring their activities, whereabouts and  
6 expected completion time. The interviews may raise anxiety or concerns related to uncertainty about  
7 diagnosis during the referral and investigation period or the watch and wait period; or psychological  
8 distress associated with a cancer diagnosis or a false-positive result. The interview study information  
9 sheet will provide appropriate sources for accessing confidential support and patients will be  
10 reminded that they have the right to not answer any question, stop the interview or withdraw from  
11 the interview study.  
12  
13  
14  
15  
16  
17  
18  
19  
20  
21

#### 22 Management of adverse consequences

23 As a result of being referred for tests or investigations there is a risk of an adverse incident. If referral  
24 rates do increase as a result of access to eRATs, there is an increased risk of an adverse event (AE) to  
25 patients of practices allocated to the intervention. We are not routinely tracking individuals  
26 throughout the trial and there is no mechanism for monitoring any AEs as a result of referral. However,  
27 psychological distress may be a consequence of referral. Individuals for whom cancer is diagnosed at  
28 an early stage may be relieved by the diagnosis and see the psychological distress as justifiable.  
29 Individuals for whom a referral does not lead to a diagnosis of cancer (false positives) may have  
30 undergone unnecessary psychological distress. Our process evaluation work will help us to understand  
31 the extent of this and its potential impact on the individuals' life.  
32  
33  
34  
35  
36  
37  
38  
39

40 During interviews, patients may report being distressed – either as a result of research activity or as a  
41 result of their health, and events in their private lives. Should such a situation arise, the researchers  
42 will implement the trial risk protocol and manage the participant in accordance with this policy.  
43 Participants will be reminded that they have the right to not answer any question, stop the interview  
44 or withdraw from the interview study. Under high-risk situations (e.g. where there is perceived  
45 immediate risk to a participant's health), the study team may be required to break confidentiality, to  
46 inform appropriate authorities who will need to provide essential care services. We will also signpost  
47 participants to sources of support. This information will be outlined in the Participant Information  
48 Sheet. Participants will be informed of possible benefits and known risks of participation in the  
49 interviews by means of a Patient Information Sheet and through discussion with the research team.  
50 Written consent will be obtained immediately prior to the interview study.  
51  
52  
53  
54  
55  
56  
57  
58  
59  
60

1 There are minimal risks to researchers as most interviews will take place in the GP practices or by  
2 telephone/online; however, if a home visit is undertaken to interview patient participants the  
3 researcher will follow the lone worker policy: researchers will make sure that their whereabouts,  
4 contact telephone number and estimated time of return are known to their colleagues and/or  
5 manager. Researchers will also have the opportunity to debrief with a senior colleague on the research  
6 team should they need any support after conducting an interview; this debrief may be in person or by  
7 telephone.  
8  
9  
10  
11  
12  
13

### 14 *Analysis*

15 For the quantitative results the individual data sources will be summarised descriptively, including a  
16 summary of data completeness. For the qualitative data we will adopt a framework approach (27)  
17 which allows the inclusion of key concepts and ideas identified from the literature, alongside themes  
18 emerging from the data. The framework approach produces a structured output matrix, with cells of  
19 data organised by practice and by code (a descriptive label applied to a section of transcript).  
20  
21  
22  
23  
24  
25

26 At least two researchers will work on the analysis. Interviews will be audio recorded, transcribed and  
27 anonymised. Data familiarisation will be achieved through the listening to and reading of interview  
28 recordings and transcripts. Transcripts will be imported into the qualitative data analysis software  
29 package NVivo 11 (QSR International) to facilitate data management, sharing and development of a  
30 coding framework. A proportion of the interview transcripts will be coded by each researcher. The  
31 'constant comparative method' (28) will be utilised: each incident in the data will be compared with  
32 other incidents for similarities and differences and any 'negative cases', where a case does not fit the  
33 pattern or cannot be explained by the emerging analysis, will be explored and recorded. Following this  
34 initial coding, a PPIE meeting (one for the GP interviews and one for the patient interviews) will be  
35 held to discuss the emerging themes from the interviews, and to gain alternative perspectives from  
36 the PPIE group on those themes. Following the PPIE meeting, the analytical framework will be  
37 developed, incorporating researcher and PPIE perspectives on the results, with a final set of themes  
38 and codes being agreed upon.  
39  
40  
41  
42  
43  
44  
45  
46  
47  
48  
49

50 The analytical framework will be applied to all interview transcripts; one researcher will index all  
51 transcripts, with a second researcher indexing a proportion, to check the reliability of the indexing and  
52 to ensure that the themes of the framework are being interpreted consistently. Any differences in  
53 interpretation will be discussed between the two researchers. Following the indexing process, data  
54 will be charted into the structured output matrix, which will summarise the data on each theme from  
55 all transcripts. A subsequent meeting of the PPIE group will be held once all of the results from the  
56 process evaluation have been gathered to gain a users' perspective of the global findings.  
57  
58  
59  
60

1  
2  
3 The final step in the process evaluation analysis will be to integrate results from the various mixed  
4 method data sources using a triangulation protocol(29) to give a more complete picture once  
5 individual data sources have been individually analysed. We plan to create a summary matrix, known  
6 as a convergence coding matrix, which summarises the findings from each data source after assessing  
7 whether the findings are in agreement, partial agreement or no agreement, or whether the data  
8 source is silent for the finding under consideration i.e. when a theme or finding arises from one data  
9 set but not another.  
10  
11  
12  
13  
14  
15

## 16 Reporting

17 The process evaluation results will be briefly summarised for inclusion in the main trial report and  
18 publication, separate dissemination (reports, presentations and publications) will provide further  
19 details of the process evaluation findings.  
20  
21  
22  
23  
24  
25

## 26 Appendix F

### 27 GP Workload

#### 28 *Background and rationale*

29  
30  
31  
32 GPs manage a high and rising workload of increasingly complex patient care with many competing  
33 demands to attend to within ten-minute consultations. (30) This, combined with ongoing recruitment  
34 and retention challenges, has contributed to a GP workforce 'crisis'. (31-36) The workload implications  
35 for GPs of using electronic tools such as eRATs during consultations is unclear.(37) ERICA provides an  
36 opportunity to examine whether the use of eRATs by GPs, and the possible subsequent discussion of  
37 cancer risk with patients, may impact consultation length and patient 'flow' through consulting  
38 sessions. This nested study aims to explore, in terms of consultation time, the impact of GPs using  
39 eRATs on GP workload and patient 'flow' through consulting sessions. It will also explore workload in  
40 the week following the index consultation in which an eRAT was activated, when relevant letters may  
41 be generated, referrals made, investigations followed through, or clinical discussions engaged in.  
42  
43  
44  
45  
46  
47  
48  
49

#### 50 *Objectives*

51 The specific objectives in respect of consultations and sessions are:  
52  
53  
54

55 (i) to measure and compare the duration of consultations and sessions in which an eRAT has been  
56 activated with consultations where eRATs have not been activated;  
57  
58  
59  
60



1 (ii) to measure and compare the duration of subsequent consultations in the same session after an  
2 eRAT has been activated with consultations in sessions where eRATs have not been activated;

3  
4  
5  
6 (iii) to explore the frequency of interactions with patients' medical records by a GP in the week  
7 following a consultation during which an eRAT was activated.  
8  
9

### 10 *Methods*

11 An observational quantitative study will be conducted in a sub-sample of ERICA intervention practices  
12 to examine the durations of consultations and consulting sessions in which eRATs are activated.  
13  
14

### 15 *Sample size*

16 The basis for the sub-study sample size calculation is on the number of consultations likely to occur  
17 over a two-week period within ERICA practices, in which an eRAT will be 'activated' (i.e. an eRAT  
18 prompt is shown and/or clinician uses an eRAT symptom checker). A number of assumptions are of  
19 note:  
20  
21  
22  
23

24 The first assumption is that a half-day GP consulting session, typically lasting four hours and comprised  
25 of ten-minute consultations, would be associated with a total of 24 consultations. Second, practices  
26 have an average headcount of seven GPs (informed by GP workforce data from NHS Digital). (38) Third,  
27 a GP is assumed to work an average of 6.7 half-day consulting sessions per week. (39) An average  
28 practice would therefore provide a total of 1,126 GP consultations per week.  
29  
30  
31  
32  
33

34 Accurate estimations of how often an eRAT will be activated, are not yet established in previous  
35 research on usage of cancer decision tools in UK general practice. (40,41) Two clinical members of the  
36 research team have estimated that an eRAT may be expected to be activated once per GP, per week.  
37 This estimate would suggest that approximately 15% of consulting sessions will involve a consultation  
38 where the eRAT tool was activated.  
39  
40  
41  
42  
43  
44

45 The standard deviation for both the length of a consultation and of a whole consulting session from  
46 previous literature was four minutes and 20 minutes respectively. (42-44) Project team discussion  
47 concluded that a minimally important difference in time for an individual consultation would be  
48 between two and five minutes; for a consulting session this minimally important difference would be  
49 approximately 10 minutes.  
50  
51  
52  
53

54 Statistical power to detect a time difference of between two and five minutes in eRAT consultations  
55 versus non-eRAT consultations is also in excess of >80%, even if eRATs are observed to have been  
56 activated in just 1:40 consulting (2.5% of sessions), the basis of the most conservative estimate. The  
57  
58  
59  
60

1 power to detect a difference of 10 minutes in sessions where eRATs have been activated compared  
2 with sessions where eRATs have not been activated is >80%, even if eRATs affect only 2.5% of sessions.  
3 A two-week observation period would provide sufficient data and power to detect differences in the  
4 length of consultations and sessions where an eRAT is activated and those where an eRAT is not  
5 activated.  
6  
7  
8  
9

## 10 Outcome measures

### 11 Primary outcome

12 The primary outcome is the length of time (in minutes) of consultations. These will be consultations  
13 during which an eRAT is activated and also those during which an eRAT is not activated. For the  
14 purposes of this sub-study, a consultation is defined as starting when the patient's electronic medical  
15 record is opened by a GP, for the purpose of conducting either a face-to-face or telephone/video  
16 interaction with the patient, and ending when the record is closed. Home visits will be excluded due  
17 to difficulty in accessing accurate time information. Consultations with health professionals who  
18 would not make referral decisions (e.g. practice nurses, physiotherapists, pharmacists, healthcare  
19 assistants) will also be excluded.  
20  
21  
22  
23  
24  
25  
26  
27

### 28 Secondary outcomes

29 In addition to our primary outcome, we propose to examine the following secondary outcomes:

- 30 • The length of time (in minutes) of consulting sessions. For the purposes of this study, a session is  
31 defined as a half-day period comprised of individual patients' pre-booked or same-day  
32 consultations. The half-day periods are typically 'morning' or 'afternoon', although some practices  
33 offer early morning and evening sessions as well. (45)  
34
- 35 • The number of instances of opening a patient's electronic medical record in the week following  
36 an eRAT being activated.  
37  
38  
39  
40  
41

### 42 Practice recruitment

43 An initial pilot in up to three ERICA intervention practices will be undertaken and plans for data  
44 collection methods revisited at that point. Practices will be approached by an invitation email and  
45 provided with an information sheet detailing the nature of the study and providing contact details of  
46 the researcher. No individual patients will be recruited.  
47  
48  
49  
50

51 *A note on practice recruitment to the nested studies:* We expect to recruit up to 91 practices across  
52 the nested studies (56 in the health economics nested study, up to 20 in the process evaluation and  
53 up to 15 in the sub-study on GP workload) practices. Practices will only be asked to help with one of  
54 the health economic nested study, the process evaluation nested study, or the GP workload sub-study.  
55  
56  
57  
58  
59  
60

## *Data collection*

### *Identifying consultations where an eRAT is activated*

The Process Evaluation describes earlier how a local 'at practice' report will be run for practices in order to collect patient-level data on eRATs usage. This report will be run for practices recruited to this nested study, covering a two-week period.

### *Measuring durations of consultations and sessions*

The eRATs usage report will provide the start and end time of the tool usage, but not the duration of a consultation. A further search function (developed within SystemOne for this nested study) will provide data on the timings of all consultations occurring between two dates (referred to as the 'appointments report'). The consultations identified in the eRAT usage report will be cross-referenced with the consultations in the appointments report. A variable will be added to denote which consultations involved an eRAT being activated and which did not.

### *Measuring workload in the week following an eRAT being activated*

The eRATs usage report will identify the relevant patient records for which an audit will be run in SystemOne. The audit will provide data on instances of the records being opened and closed by practice staff during the week following the index activation of an eRAT.

## *Data analysis*

Data will be analysed in Stata. Descriptive statistics summarising participating practices and GPs will be presented. Although practice level data will be presented, it will be anonymised (e.g. practice A, B, etc) to protect the identities of individual practitioners or practices.

The primary analysis of the durations of consultations in which an eRAT is activated, will take the form of a mixed-effects linear regression with random intercepts to account for clustering within GPs and for GPs clustering within practices. This regression will adjust for consulting GP, time of day, day of week, and consultation mode (face-to-face, telephone, video). Residuals will be checked for normality. As duration data are typically not normally distributed, the data will be transformed if needed, using log transformation. Bootstrapping of the data will also be undertaken if needed. Similar mixed-effects linear regression models with random intercepts will also be performed for secondary outcomes; the duration of consulting sessions, and the number of instances of opening a patient's electronic medical record in the week following an eRAT being activated. For all models where duration is the outcome linear models will be used, but for the count of opening medical records Poisson models will be used.

## *Governance and ethical considerations*

### *Consent*

Individual patient consent is not sought within ERICA for the running of the eRAT usage report. The reports in SystmOne, described for this nested study, will not contain identifiable patient data nor clinically sensitive information and so patient consent for these reports will also not be sought.

### *Data protection/management and confidentiality*

The eRAT usage report and the SystmOne reports will contain pseudo-anonymised data: a patient identifier. However, the reports will contain variables denoting date, time and consulting GP, which will allow cross-referencing, so practices will be asked to delete the patient identifier before sending the report securely and electronically to a secure Exeter CTU computer using a predetermined practice ID number. These measures will ensure the data are anonymised. In the event that the researcher visits the practice to run the SystmOne reports, the files will be anonymised in the same way before the researcher leaves. Practices will keep the original 'master' report files containing the patient's practice computer ID.

### *Finance*

The additional work for the nested study, outside of ERICA costs, is for practices to run the reports in SystmOne and send the report files securely to the researcher. Alternatively, the researcher will visit the practice to run the reports, which may require time of a practice administrator or manager for logging in to the clinical system and orientation. In both scenarios, this time would be covered by nested study research costs at a rate of £50 per hour, and each practice will be offered reimbursement for up to 2 hours. Travel costs for the researcher to visit practices where needed are estimated at £0.45 per mile for a 75 mile round-trip per practice (South West).

## References

1. Neal RD, Din NU, Hamilton W, Ukoumunne OC, Carter B, Stapley S, et al. Comparison of cancer diagnostic intervals before and after implementation of NICE guidelines: analysis of data from the UK General Practice Research Database. *Br J Cancer*. 2014;110(3):584-92.
2. Pickard AS, Neary MP, Cella D. Estimation of minimally important differences in EQ-5D utility and VAS scores in cancer. *Health and quality of life outcomes*. 2007;5:70-.
3. Kind P, Hardman G, Macran S. UK population norms for EQ-5D. Centre for Health Economics, University of York; 1999.
4. Man M-S, Chaplin K, Mann C, Bower P, Brookes S, Fitzpatrick B, et al. Improving the management of multimorbidity in general practice: protocol of a cluster randomised controlled trial (The 3D Study). *BMJ Open*. 2016;6(4):e011261.
5. Curtis L. Unit Costs of Health and Social Care 2020 [Available from: <https://www.pssru.ac.uk/project-pages/unit-costs/unit-costs-2020/>]. 2020.
6. Department of Health and Social Care. NHS reference costs 2019 to 2020 [Available from: <https://improvement.nhs.uk/resources/reference-costs/>]. 2020.
7. Caro JJ, Briggs AH, Siebert U, Kuntz KM. Modeling good research practices--overview: a report of the ISPOR-SMDM Modeling Good Research Practices Task Force-1. *Medical decision making : an international journal of the Society for Medical Decision Making*. 2012;32(5):667-77.
8. Siebert U, Alagoz O, Bayoumi AM, Jahn B, Owens DK, Cohen DJ, et al. State-Transition Modeling:A Report of the ISPOR-SMDM Modeling Good Research Practices Task Force--3. *Medical Decision Making*. 2012;32(5):690-700.
9. Schwander B, Hiligsmann M, Nuijten M, Evers S. Systematic review and overview of health economic evaluation models in obesity prevention and therapy. *Expert review of pharmacoeconomics & outcomes research*. 2016;16(5):561-70.
10. Wang BC, Furnback W. Modelling the long-term outcomes of bariatric surgery: A review of cost-effectiveness studies. *Best practice & research Clinical gastroenterology*. 2013;27(6):987-95.
11. Andronis L, Barton P, Bryan S. Sensitivity analysis in economic evaluation: an audit of NICE current practice and a review of its use and value in decision-making. *Health Technol Assess*. 2009;13(29):iii, ix-xi, 1-61.
12. Fenwick E, O'Brien BJ, Briggs A. Cost-effectiveness acceptability curves--facts, fallacies and frequently asked questions. *Health economics*. 2004;13(5):405-15.
13. Husereau D, Drummond M, Petrou S, Carswell C, Moher D, Greenberg D, et al. Consolidated Health Economic Evaluation Reporting Standards (CHEERS) statement. *Value Health*. 2013;16(2):e1-5.
14. NICE. Guide to the Methods of Technology Appraisals, Section 5.6 Discounting [Available from: <https://www.nice.org.uk/process/pmg9/chapter/the-reference-case#discounting>]. 2013.
15. Faria R, Gomes M, Epstein D, White IR. A guide to handling missing data in cost-effectiveness analysis conducted within randomised controlled trials. *Pharmacoeconomics*. 2014;32(12):1157-70.
16. Brazier J, Longworth L. NICE DSU Technical Support Document 8: An introduction to the measurement and valuation of health for NICE submissions. In: Health, editor. 2011.
17. Tengs TO, Wallace A. One thousand health-related quality-of-life estimates. *Medical care*. 2000;38(6):583-637.
18. NHS England. (2019) The NHS Long Term Plan [Available from: <https://www.longtermplan.nhs.uk/>].
19. Michie S, van Stralen MM, West R. The behaviour change wheel: a new method for characterising and designing behaviour change interventions. *Implementation science : IS*. 2011;6:42-.
20. Grant A, Treweek S, Dreischulte T, Foy R, Guthrie B. Process evaluations for cluster-randomised trials of complex interventions: a proposed framework for design and reporting. *Trials*. 2013;14:15.
21. Hawe P, Shiell A, Riley T. Complex interventions: how "out of control" can a randomised controlled trial be? *BMJ (Clinical research ed)*. 2004;328(7455):1561-3.
22. Shephard EA, Stapley S, Neal RD, Rose P, Walter FM, Hamilton WT. Clinical features of bladder cancer in primary care. *The British journal of general practice : the journal of the Royal College of General Practitioners*. 2012;62(602):e598-604.
23. Shephard E, Neal R, Rose P, Walter F, Hamilton WT. Clinical features of kidney cancer in primary care: a case-control study using primary care records. *The British journal of general practice : the journal of the Royal College of General Practitioners*. 2013;63(609):e250-5.

24. Hamilton W. The CAPER studies: five case-control studies aimed at identifying and quantifying the risk of cancer in symptomatic primary care patients. *Br J Cancer*. 2009;101 Suppl 2:S80-6.
25. Stapley S, Peters TJ, Neal RD, Rose PW, Walter FM, Hamilton W. The risk of oesophago-gastric cancer in symptomatic patients in primary care: a large case-control study using electronic records. *Br J Cancer*. 2013;108(1):25-31.
26. Yin R. *Case Study Research: Design and Methods*. London: Sage Publications 2003.
27. Ritchie J, Spencer L, O'Connor W. Carrying out Qualitative Analysis. In: Ritchie J, Lewis J, editors. *Qualitative Research Practice, A guide for Social Science Students and Researchers* London: Sage; 2003.
28. Corbin J, Strauss A. *Basics of qualitative research: Techniques and procedures for developing grounded theory*. London: Sage publications; 2014.
29. O'Cathain A, Murphy E, Nicholl J. Three techniques for integrating data in mixed methods studies. *BMJ*. 2010;341:c4587.
30. Hobbs FDR, Bankhead C, Mukhtar T, Stevens S, Perera-Salazar R, Holt T, et al. Clinical workload in UK primary care: a retrospective analysis of 100 million consultations in England, 2007-14. *Lancet* 2016;387:2323-30. [http://dx.doi.org/10.1016/S0140-6736\(16\)00620-6](http://dx.doi.org/10.1016/S0140-6736(16)00620-6)
31. Baird B, Charles A, Honeyman M, Maguire D, Das P. *Understanding pressures in general practice: The Kings Fund*; 2016.
32. Campbell J CR, Sansom A. *Retaining the experienced GP workforce in direct patient care (ReGROUP): final report*. Exeter: University of Exeter Medical School; 2015.
33. Sansom A, Terry R, Fletcher E, Salisbury C, Long L, Richards SH, et al. Why do GPs leave direct patient care and what might help to retain them? A qualitative study of GPs in South West England. *BMJ Open* 2018;8:e019849. <http://dx.doi.org/10.1136/bmjopen-2017-019849>
34. Roland M, Everington S. Tackling the crisis in general practice. *BMJ* 2016;352:i942. <http://dx.doi.org/10.1136/bmj.i942>
35. Fletcher E, Abel GA, Anderson R, Richards SH, Salisbury C, Dean SG, et al. Quitting patient care and career break intentions among general practitioners in South West England: findings of a census survey of general practitioners. *BMJ Open* 2017;7:e015853. <http://dx.doi.org/10.1136/bmjopen-2017-015853>
36. Walker B, Moss, C., Gibson, J., Sutton, M., Spooner, S., Checkland, K. *Tenth National GP Worklife Survey*. Manchester: Policy Research Unit in Commissioning and the Healthcare System Manchester Centre for Health Economics; 2019.
37. Fletcher E, Burns, A., Wiering, B., Lavi, D., Shephard, E., Hamilton, W., Campbell, J. L., Abel, G. Workload and workflow implications associated with the use of electronic risk assessment tools used by health professionals in general practice: a scoping review. In: University of Exeter Medical School; 2022.
38. NHS Digital. *General Practice Workforce 30 September 2019*. NHS Digital; 2019. URL: <https://digital.nhs.uk/data-and-information/publications/statistical/general-and-personal-medical-services/final-30-september-2019#resources> (Accessed 11/02/20).
39. Gibson J, Sutton M, Spooner S, Checkland K. *Ninth National GP Worklife Survey 2017*. In; 2017.
40. Moffat J, Ironmonger L. *Clinical Decision Support Tool for Cancer (CDS) Project evaluation report to the Department of Health*; 2014.
41. Robinson R, Poirier V, Watson S. *Using Cancer Decision Support Tools to support the early diagnosis of cancer*; 2017.
42. Salisbury C, Procter S, Stewart K, Bowen L, Purdy S, Ridd M, et al. The content of general practice consultations: cross-sectional study based on video recordings. *British Journal of General Practice* 2013;63:e751. <http://dx.doi.org/10.3399/bjgp13X674431>
43. Elmore N, Burt J, Abel G, Maratos FA, Montague J, Campbell J, et al. Investigating the relationship between consultation length and patient experience: a cross-sectional study in primary care. *Br J Gen Pract* 2016;66:e896-e903. <http://dx.doi.org/10.3399/bjgp16X687733>
44. Orton PK, Pereira Gray D. Factors influencing consultation length in general/family practice. *Fam Pract* 2016;33:529-34. <http://dx.doi.org/10.1093/fampra/cmz056>
45. NHS. *Working life (GP)*. NHS; 2022. URL: <https://www.healthcareers.nhs.uk/explore-roles/doctors/roles-doctors/general-practice-gp/working-life> (Accessed 2022).



STANDARD PROTOCOL ITEMS: RECOMMENDATIONS FOR INTERVENTIONAL TRIALS

## SPIRIT 2013 Checklist: Recommended items to address in a clinical trial protocol and related documents\*

| Section/item                      | Item No | Description                                                                                                                                                                                                                                                                              | Addressed on page number |
|-----------------------------------|---------|------------------------------------------------------------------------------------------------------------------------------------------------------------------------------------------------------------------------------------------------------------------------------------------|--------------------------|
| <b>Administrative information</b> |         |                                                                                                                                                                                                                                                                                          |                          |
| Title                             | 1       | Descriptive title identifying the study design, population, interventions, and, if applicable, trial acronym                                                                                                                                                                             | Title page               |
| Trial registration                | 2a      | Trial identifier and registry name. If not yet registered, name of intended registry                                                                                                                                                                                                     | 1 & 15                   |
|                                   | 2b      | All items from the World Health Organization Trial Registration Data Set                                                                                                                                                                                                                 | n/a                      |
| Protocol version                  | 3       | Date and version identifier                                                                                                                                                                                                                                                              | 1 & 15                   |
| Funding                           | 4       | Sources and types of financial, material, and other support                                                                                                                                                                                                                              | 15                       |
| Roles and responsibilities        | 5a      | Names, affiliations, and roles of protocol contributors                                                                                                                                                                                                                                  | 15                       |
|                                   | 5b      | Name and contact information for the trial sponsor                                                                                                                                                                                                                                       | 1                        |
|                                   | 5c      | Role of study sponsor and funders, if any, in study design; collection, management, analysis, and interpretation of data; writing of the report; and the decision to submit the report for publication, including whether they will have ultimate authority over any of these activities | 12                       |
|                                   | 5d      | Composition, roles, and responsibilities of the coordinating centre, steering committee, endpoint adjudication committee, data management team, and other individuals or groups overseeing the trial, if applicable (see Item 21a for data monitoring committee)                         | 12-13                    |

1 **Introduction**

2

3 Background and rationale 6a Description of research question and justification for undertaking the trial, including summary of relevant studies (published and unpublished) examining benefits and harms for each intervention 2-3

4

5

6 6b Explanation for choice of comparators 5-7

7

8 Objectives 7 Specific objectives or hypotheses 3-4

9

10 Trial design 8 Description of trial design including type of trial (eg, parallel group, crossover, factorial, single group), allocation ratio, and framework (eg, superiority, equivalence, noninferiority, exploratory) 4

11

12

13

14 **Methods: Participants, interventions, and outcomes**

15

16 Study setting 9 Description of study settings (eg, community clinic, academic hospital) and list of countries where data will be collected. Reference to where list of study sites can be obtained 4

17

18

19 Eligibility criteria 10 Inclusion and exclusion criteria for participants. If applicable, eligibility criteria for study centres and individuals who will perform the interventions (eg, surgeons, psychotherapists) 7

20

21

22 Interventions 11a Interventions for each group with sufficient detail to allow replication, including how and when they will be administered 4-5

23

24

25 11b Criteria for discontinuing or modifying allocated interventions for a given trial participant (eg, drug dose change in response to harms, participant request, or improving/worsening disease) n/a

26

27

28 11c Strategies to improve adherence to intervention protocols, and any procedures for monitoring adherence (eg, drug tablet return, laboratory tests) 14 and Appx D

29

30

31 11d Relevant concomitant care and interventions that are permitted or prohibited during the trial 4-7

32

33

34 Outcomes 12 Primary, secondary, and other outcomes, including the specific measurement variable (eg, systolic blood pressure), analysis metric (eg, change from baseline, final value, time to event), method of aggregation (eg, median, proportion), and time point for each outcome. Explanation of the clinical relevance of chosen efficacy and harm outcomes is strongly recommended 8-9

35

36

37

38

39

40 Participant timeline 13 Time schedule of enrolment, interventions (including any run-ins and washouts), assessments, and visits for participants. A schematic diagram is highly recommended (see Figure) 6

41

42

43

44

45

46



|    |                                                                     |     |                                                                                                                                                                                                                                                                                                                                                                                                              |       |
|----|---------------------------------------------------------------------|-----|--------------------------------------------------------------------------------------------------------------------------------------------------------------------------------------------------------------------------------------------------------------------------------------------------------------------------------------------------------------------------------------------------------------|-------|
| 1  | Sample size                                                         | 14  | Estimated number of participants needed to achieve study objectives and how it was determined, including clinical and statistical assumptions supporting any sample size calculations                                                                                                                                                                                                                        | 6-7   |
| 2  |                                                                     |     |                                                                                                                                                                                                                                                                                                                                                                                                              |       |
| 3  |                                                                     |     |                                                                                                                                                                                                                                                                                                                                                                                                              |       |
| 4  | Recruitment                                                         | 15  | Strategies for achieving adequate participant enrolment to reach target sample size                                                                                                                                                                                                                                                                                                                          | 7     |
| 5  |                                                                     |     |                                                                                                                                                                                                                                                                                                                                                                                                              |       |
| 6  |                                                                     |     |                                                                                                                                                                                                                                                                                                                                                                                                              |       |
| 7  | <b>Methods: Assignment of interventions (for controlled trials)</b> |     |                                                                                                                                                                                                                                                                                                                                                                                                              |       |
| 8  | Allocation:                                                         |     |                                                                                                                                                                                                                                                                                                                                                                                                              |       |
| 9  |                                                                     |     |                                                                                                                                                                                                                                                                                                                                                                                                              |       |
| 10 | Sequence                                                            | 16a | Method of generating the allocation sequence (eg, computer-generated random numbers), and list of any factors for stratification. To reduce predictability of a random sequence, details of any planned restriction (eg, blocking) should be provided in a separate document that is unavailable to those who enrol participants or assign interventions                                                     | 7     |
| 11 | generation                                                          |     |                                                                                                                                                                                                                                                                                                                                                                                                              |       |
| 12 |                                                                     |     |                                                                                                                                                                                                                                                                                                                                                                                                              |       |
| 13 |                                                                     |     |                                                                                                                                                                                                                                                                                                                                                                                                              |       |
| 14 |                                                                     |     |                                                                                                                                                                                                                                                                                                                                                                                                              |       |
| 15 |                                                                     |     |                                                                                                                                                                                                                                                                                                                                                                                                              |       |
| 16 | Allocation                                                          | 16b | Mechanism of implementing the allocation sequence (eg, central telephone; sequentially numbered, opaque, sealed envelopes), describing any steps to conceal the sequence until interventions are assigned                                                                                                                                                                                                    | 7     |
| 17 | concealment                                                         |     |                                                                                                                                                                                                                                                                                                                                                                                                              |       |
| 18 | mechanism                                                           |     |                                                                                                                                                                                                                                                                                                                                                                                                              |       |
| 19 |                                                                     |     |                                                                                                                                                                                                                                                                                                                                                                                                              |       |
| 20 | Implementation                                                      | 16c | Who will generate the allocation sequence, who will enrol participants, and who will assign participants to interventions                                                                                                                                                                                                                                                                                    | 7     |
| 21 |                                                                     |     |                                                                                                                                                                                                                                                                                                                                                                                                              |       |
| 22 |                                                                     |     |                                                                                                                                                                                                                                                                                                                                                                                                              |       |
| 23 |                                                                     |     |                                                                                                                                                                                                                                                                                                                                                                                                              |       |
| 24 | Blinding (masking)                                                  | 17a | Who will be blinded after assignment to interventions (eg, trial participants, care providers, outcome assessors, data analysts), and how                                                                                                                                                                                                                                                                    | 7-8   |
| 25 |                                                                     |     |                                                                                                                                                                                                                                                                                                                                                                                                              |       |
| 26 |                                                                     |     |                                                                                                                                                                                                                                                                                                                                                                                                              |       |
| 27 |                                                                     | 17b | If blinded, circumstances under which unblinding is permissible, and procedure for revealing a participant's allocated intervention during the trial                                                                                                                                                                                                                                                         | n/a   |
| 28 |                                                                     |     |                                                                                                                                                                                                                                                                                                                                                                                                              |       |
| 29 |                                                                     |     |                                                                                                                                                                                                                                                                                                                                                                                                              |       |
| 30 |                                                                     |     |                                                                                                                                                                                                                                                                                                                                                                                                              |       |
| 31 | <b>Methods: Data collection, management, and analysis</b>           |     |                                                                                                                                                                                                                                                                                                                                                                                                              |       |
| 32 |                                                                     |     |                                                                                                                                                                                                                                                                                                                                                                                                              |       |
| 33 | Data collection                                                     | 18a | Plans for assessment and collection of outcome, baseline, and other trial data, including any related processes to promote data quality (eg, duplicate measurements, training of assessors) and a description of study instruments (eg, questionnaires, laboratory tests) along with their reliability and validity, if known. Reference to where data collection forms can be found, if not in the protocol | 9-12  |
| 34 | methods                                                             |     |                                                                                                                                                                                                                                                                                                                                                                                                              |       |
| 35 |                                                                     |     |                                                                                                                                                                                                                                                                                                                                                                                                              |       |
| 36 |                                                                     |     |                                                                                                                                                                                                                                                                                                                                                                                                              |       |
| 37 |                                                                     |     |                                                                                                                                                                                                                                                                                                                                                                                                              |       |
| 38 |                                                                     |     |                                                                                                                                                                                                                                                                                                                                                                                                              |       |
| 39 |                                                                     | 18b | Plans to promote participant retention and complete follow-up, including list of any outcome data to be collected for participants who discontinue or deviate from intervention protocols                                                                                                                                                                                                                    | 11-12 |
| 40 |                                                                     |     |                                                                                                                                                                                                                                                                                                                                                                                                              |       |
| 41 |                                                                     |     |                                                                                                                                                                                                                                                                                                                                                                                                              |       |
| 42 |                                                                     |     |                                                                                                                                                                                                                                                                                                                                                                                                              |       |
| 43 |                                                                     |     |                                                                                                                                                                                                                                                                                                                                                                                                              |       |
| 44 |                                                                     |     |                                                                                                                                                                                                                                                                                                                                                                                                              |       |
| 45 |                                                                     |     |                                                                                                                                                                                                                                                                                                                                                                                                              |       |
| 46 |                                                                     |     |                                                                                                                                                                                                                                                                                                                                                                                                              |       |

|    |                                 |     |                                                                                                                                                                                                                                                                                                                                       |               |
|----|---------------------------------|-----|---------------------------------------------------------------------------------------------------------------------------------------------------------------------------------------------------------------------------------------------------------------------------------------------------------------------------------------|---------------|
| 1  | Data management                 | 19  | Plans for data entry, coding, security, and storage, including any related processes to promote data quality (eg, double data entry; range checks for data values). Reference to where details of data management procedures can be found, if not in the protocol                                                                     | 11-12         |
| 2  |                                 |     |                                                                                                                                                                                                                                                                                                                                       |               |
| 3  |                                 |     |                                                                                                                                                                                                                                                                                                                                       |               |
| 4  |                                 |     |                                                                                                                                                                                                                                                                                                                                       |               |
| 5  | Statistical methods             | 20a | Statistical methods for analysing primary and secondary outcomes. Reference to where other details of the statistical analysis plan can be found, if not in the protocol                                                                                                                                                              | 9-11          |
| 6  |                                 |     |                                                                                                                                                                                                                                                                                                                                       |               |
| 7  |                                 |     |                                                                                                                                                                                                                                                                                                                                       |               |
| 8  |                                 | 20b | Methods for any additional analyses (eg, subgroup and adjusted analyses)                                                                                                                                                                                                                                                              | 11            |
| 9  |                                 |     |                                                                                                                                                                                                                                                                                                                                       |               |
| 10 |                                 | 20c | Definition of analysis population relating to protocol non-adherence (eg, as randomised analysis), and any statistical methods to handle missing data (eg, multiple imputation)                                                                                                                                                       | 11            |
| 11 |                                 |     |                                                                                                                                                                                                                                                                                                                                       |               |
| 12 |                                 |     |                                                                                                                                                                                                                                                                                                                                       |               |
| 13 |                                 |     |                                                                                                                                                                                                                                                                                                                                       |               |
| 14 | <b>Methods: Monitoring</b>      |     |                                                                                                                                                                                                                                                                                                                                       |               |
| 15 |                                 |     |                                                                                                                                                                                                                                                                                                                                       |               |
| 16 | Data monitoring                 | 21a | Composition of data monitoring committee (DMC); summary of its role and reporting structure; statement of whether it is independent from the sponsor and competing interests; and reference to where further details about its charter can be found, if not in the protocol. Alternatively, an explanation of why a DMC is not needed | 12-13         |
| 17 |                                 |     |                                                                                                                                                                                                                                                                                                                                       |               |
| 18 |                                 |     |                                                                                                                                                                                                                                                                                                                                       |               |
| 19 |                                 |     |                                                                                                                                                                                                                                                                                                                                       |               |
| 20 |                                 |     |                                                                                                                                                                                                                                                                                                                                       |               |
| 21 |                                 |     |                                                                                                                                                                                                                                                                                                                                       |               |
| 22 |                                 | 21b | Description of any interim analyses and stopping guidelines, including who will have access to these interim results and make the final decision to terminate the trial                                                                                                                                                               | n/a           |
| 23 |                                 |     |                                                                                                                                                                                                                                                                                                                                       |               |
| 24 |                                 |     |                                                                                                                                                                                                                                                                                                                                       |               |
| 25 | Harms                           | 22  | Plans for collecting, assessing, reporting, and managing solicited and spontaneously reported adverse events and other unintended effects of trial interventions or trial conduct                                                                                                                                                     | 9, Appendix D |
| 26 |                                 |     |                                                                                                                                                                                                                                                                                                                                       |               |
| 27 |                                 |     |                                                                                                                                                                                                                                                                                                                                       |               |
| 28 | Auditing                        | 23  | Frequency and procedures for auditing trial conduct, if any, and whether the process will be independent from investigators and the sponsor                                                                                                                                                                                           | n/a           |
| 29 |                                 |     |                                                                                                                                                                                                                                                                                                                                       |               |
| 30 |                                 |     |                                                                                                                                                                                                                                                                                                                                       |               |
| 31 |                                 |     |                                                                                                                                                                                                                                                                                                                                       |               |
| 32 | <b>Ethics and dissemination</b> |     |                                                                                                                                                                                                                                                                                                                                       |               |
| 33 |                                 |     |                                                                                                                                                                                                                                                                                                                                       |               |
| 34 | Research ethics approval        | 24  | Plans for seeking research ethics committee/institutional review board (REC/IRB) approval                                                                                                                                                                                                                                             | 15            |
| 35 |                                 |     |                                                                                                                                                                                                                                                                                                                                       |               |
| 36 |                                 |     |                                                                                                                                                                                                                                                                                                                                       |               |
| 37 | Protocol amendments             | 25  | Plans for communicating important protocol modifications (eg, changes to eligibility criteria, outcomes, analyses) to relevant parties (eg, investigators, REC/IRBs, trial participants, trial registries, journals, regulators)                                                                                                      | 12-13         |
| 38 |                                 |     |                                                                                                                                                                                                                                                                                                                                       |               |
| 39 |                                 |     |                                                                                                                                                                                                                                                                                                                                       |               |
| 40 |                                 |     |                                                                                                                                                                                                                                                                                                                                       |               |
| 41 |                                 |     |                                                                                                                                                                                                                                                                                                                                       |               |
| 42 |                                 |     |                                                                                                                                                                                                                                                                                                                                       |               |

|    |                               |     |                                                                                                                                                                                                                                                                                     |                                                                                                              |
|----|-------------------------------|-----|-------------------------------------------------------------------------------------------------------------------------------------------------------------------------------------------------------------------------------------------------------------------------------------|--------------------------------------------------------------------------------------------------------------|
| 1  | Consent or assent             | 26a | Who will obtain informed consent or assent from potential trial participants or authorised surrogates, and how (see Item 32)                                                                                                                                                        | 11 & Appendices B & D (only relevant for nested studies)                                                     |
| 2  |                               |     |                                                                                                                                                                                                                                                                                     |                                                                                                              |
| 3  |                               |     |                                                                                                                                                                                                                                                                                     |                                                                                                              |
| 4  |                               |     |                                                                                                                                                                                                                                                                                     |                                                                                                              |
| 5  |                               | 26b | Additional consent provisions for collection and use of participant data and biological specimens in ancillary studies, if applicable                                                                                                                                               | 11 & Appendices B & D (only relevant for nested studies)                                                     |
| 6  |                               |     |                                                                                                                                                                                                                                                                                     |                                                                                                              |
| 7  |                               |     |                                                                                                                                                                                                                                                                                     |                                                                                                              |
| 8  |                               |     |                                                                                                                                                                                                                                                                                     |                                                                                                              |
| 9  | Confidentiality               | 27  | How personal information about potential and enrolled participants will be collected, shared, and maintained in order to protect confidentiality before, during, and after the trial                                                                                                | 11-12                                                                                                        |
| 10 |                               |     |                                                                                                                                                                                                                                                                                     |                                                                                                              |
| 11 |                               |     |                                                                                                                                                                                                                                                                                     |                                                                                                              |
| 12 |                               |     |                                                                                                                                                                                                                                                                                     |                                                                                                              |
| 13 | Declaration of interests      | 28  | Financial and other competing interests for principal investigators for the overall trial and each study site                                                                                                                                                                       | 15                                                                                                           |
| 14 |                               |     |                                                                                                                                                                                                                                                                                     |                                                                                                              |
| 15 |                               |     |                                                                                                                                                                                                                                                                                     |                                                                                                              |
| 16 | Access to data                | 29  | Statement of who will have access to the final trial dataset, and disclosure of contractual agreements that limit such access for investigators                                                                                                                                     | 14                                                                                                           |
| 17 |                               |     |                                                                                                                                                                                                                                                                                     |                                                                                                              |
| 18 |                               |     |                                                                                                                                                                                                                                                                                     |                                                                                                              |
| 19 | Ancillary and post-trial care | 30  | Provisions, if any, for ancillary and post-trial care, and for compensation to those who suffer harm from trial participation                                                                                                                                                       | n/a                                                                                                          |
| 20 |                               |     |                                                                                                                                                                                                                                                                                     |                                                                                                              |
| 21 |                               |     |                                                                                                                                                                                                                                                                                     |                                                                                                              |
| 22 | Dissemination policy          | 31a | Plans for investigators and sponsor to communicate trial results to participants, healthcare professionals, the public, and other relevant groups (eg, via publication, reporting in results databases, or other data sharing arrangements), including any publication restrictions | 14                                                                                                           |
| 23 |                               |     |                                                                                                                                                                                                                                                                                     |                                                                                                              |
| 24 |                               |     |                                                                                                                                                                                                                                                                                     |                                                                                                              |
| 25 |                               |     |                                                                                                                                                                                                                                                                                     |                                                                                                              |
| 26 |                               |     |                                                                                                                                                                                                                                                                                     |                                                                                                              |
| 27 |                               | 31b | Authorship eligibility guidelines and any intended use of professional writers                                                                                                                                                                                                      | 14                                                                                                           |
| 28 |                               |     |                                                                                                                                                                                                                                                                                     |                                                                                                              |
| 29 |                               | 31c | Plans, if any, for granting public access to the full protocol, participant-level dataset, and statistical code                                                                                                                                                                     | 14                                                                                                           |
| 30 |                               |     |                                                                                                                                                                                                                                                                                     |                                                                                                              |
| 31 | <b>Appendices</b>             |     |                                                                                                                                                                                                                                                                                     |                                                                                                              |
| 32 |                               |     |                                                                                                                                                                                                                                                                                     |                                                                                                              |
| 33 | Informed consent materials    | 32  | Model consent form and other related documentation given to participants and authorised surrogates                                                                                                                                                                                  | Not applicable for main trial. Multiple documents for each nested study, available from authors upon request |
| 34 |                               |     |                                                                                                                                                                                                                                                                                     |                                                                                                              |
| 35 |                               |     |                                                                                                                                                                                                                                                                                     |                                                                                                              |
| 36 |                               |     |                                                                                                                                                                                                                                                                                     |                                                                                                              |
| 37 |                               |     |                                                                                                                                                                                                                                                                                     |                                                                                                              |
| 38 |                               |     |                                                                                                                                                                                                                                                                                     |                                                                                                              |
| 39 |                               |     |                                                                                                                                                                                                                                                                                     |                                                                                                              |
| 40 |                               |     |                                                                                                                                                                                                                                                                                     |                                                                                                              |
| 41 |                               |     |                                                                                                                                                                                                                                                                                     |                                                                                                              |
| 42 |                               |     |                                                                                                                                                                                                                                                                                     |                                                                                                              |
| 43 |                               |     |                                                                                                                                                                                                                                                                                     |                                                                                                              |
| 44 |                               |     |                                                                                                                                                                                                                                                                                     |                                                                                                              |
| 45 |                               |     |                                                                                                                                                                                                                                                                                     |                                                                                                              |
| 46 |                               |     |                                                                                                                                                                                                                                                                                     |                                                                                                              |

1 Biological 33 Plans for collection, laboratory evaluation, and storage of biological specimens for genetic or molecular n/a  
2 specimens analysis in the current trial and for future use in ancillary studies, if applicable  
3

---

4 \*It is strongly recommended that this checklist be read in conjunction with the SPIRIT 2013 Explanation & Elaboration for important clarification on the items.  
5 Amendments to the protocol should be tracked and dated. The SPIRIT checklist is copyrighted by the SPIRIT Group under the Creative Commons  
6 [“Attribution-NonCommercial-NoDerivs 3.0 Unported”](#) license.  
7  
8  
9  
10  
11  
12  
13  
14  
15  
16  
17  
18  
19  
20  
21  
22  
23  
24  
25  
26  
27  
28  
29  
30  
31  
32  
33  
34  
35  
36  
37  
38  
39  
40  
41  
42  
43  
44  
45  
46

For peer review only
